# Supplementary material for: In defense of Apocynaceae: inference on evolution of pyrrolizidine alkaloids from evolution of an enzyme in their biosynthetic pathway, homospermidine synthase
Source: bioRxiv or medRxiv preprint supplement (doi:10.1101/2023.04.01.535177), 2024-02-28
Supplement: Supplementary file [file media-2.pdf]

**Table S1:** Sampled sequences, including species name of the source sample and its tribal/subfamily placement, the name of each sequence in the three alignments (initial, full dataset, and reduced dataset alignments), the amino acid motif (when the sequence contains exon 6, where the motif occurs), voucher information (Collector, collection number, herbarium code), and the Genbank or 1kp accession number. Repeat sequence names in the Full and Reduced datasets indicate that associated contigs in the Initial alignment have been concatenated.  $\Psi$  in the sequence name indicates that it is a possible pseudogene (i.e. includes a non-terminal stop codon).

| Subfamily/Tribe | Taxon name                                   | Initial alignment sequence name                     | Full dataset sequence name                  | Reduced dataset sequence name              | aa motif | Voucher info                                                                                                              | Genbank/1kp Accession |
|-----------------|----------------------------------------------|-----------------------------------------------------|---------------------------------------------|--------------------------------------------|----------|---------------------------------------------------------------------------------------------------------------------------|-----------------------|
| Alyxieae        | <i>Plectaneia thouarsii</i> Roem. & Schult.  | Plectaneia_thouarsii                                | Plectaneia_thouarsii                        | Plectaneia_thouarsii                       | IXXXN    | Livshultz et al. 2018                                                                                                     | MG817707              |
| Amsonieae       | <i>Amsonia hubrichtii</i> Woodson            | Amsonia_hubrichtii_1                                | Amsonia_hubrichtii_1                        | Amsonia_hubrichtii_1                       | IXXXN    | Phytometasyn, <a href="https://bioinformatics.tugraz.at/phytometasyn/">https://bioinformatics.tugraz.at/phytometasyn/</a> | MG805363              |
| Amsonieae       | <i>Amsonia hubrichtii</i> Woodson            | Amsonia_hubrichtii_2                                | Amsonia_hubrichtii_2                        | Amsonia_hubrichtii_2                       | IXXXN    | Phytometasyn, <a href="https://bioinformatics.tugraz.at/phytometasyn/">https://bioinformatics.tugraz.at/phytometasyn/</a> | MG805364              |
| Amsonieae       | <i>Amsonia orientalis</i> Decne.             | Amsonia_orientalis_PA97_contig0_dhs_exon1-4_ $\Psi$ | Amsonia_orientalis_PA97_dhs_exon1-4_ $\Psi$ |                                            |          | M. Endress s.n. (Z)                                                                                                       | ON793188              |
| Amsonieae       | <i>Amsonia orientalis</i> Decne.             | Amsonia_orientalis_PA97_contig1_dhs_exon5-7         | Amsonia_orientalis_PA97_dhs_exon1-7         | Amsonia_orientalis_PA97_dhs_exon1-7        | IXXXN    | M. Endress s.n. (Z)                                                                                                       | ON793189              |
| Amsonieae       | <i>Amsonia orientalis</i> Decne.             | Amsonia_orientalis_PA97_contig2_dhs_exon5-7         | Amsonia_orientalis_PA97_dhs_exon1-7         | Amsonia_orientalis_PA97_dhs_exon1-7        | IXXXN    | M. Endress s.n. (Z)                                                                                                       | ON793190              |
| Amsonieae       | <i>Amsonia orientalis</i> Decne.             | Amsonia_orientalis_PA97_contig3_dhs_exon1-4         | Amsonia_orientalis_PA97_dhs_exon1-7         | Amsonia_orientalis_PA97_dhs_exon1-7        |          | M. Endress s.n. (Z)                                                                                                       | ON793191              |
| Apocyneae       | <i>Aganosma cymosa</i> (Roxb.) G.Don         | Aganosma_cymosa                                     |                                             |                                            | IXXXN    | Livshultz et al. 2018                                                                                                     | MG817670              |
| Apocyneae       | <i>Aganosma schlechteriana</i> H.Lév.        | Aganosma_schlechteriana_T LA24_contig0_dhs_exon1-7  | Aganosma_schlechteriana_T LA24_dhs_exon1-7  | Aganosma_schlechteriana_T LA24_dhs_exon1-7 | IXXXN    | Newman et al. 1069 (A)                                                                                                    | ON793192              |
| Apocyneae       | <i>Aganosma schlechteriana</i> H.Lév.        | Aganosma_schlechteriana_T LA24_contig1_hss_exon1-7  | Aganosma_schlechteriana_T LA24_hss_exon1-7  | Aganosma_schlechteriana_T LA24_hss_exon1-7 | VXXXD    | Newman et al. 1069 (A)                                                                                                    | ON793193              |
| Apocyneae       | <i>Aganosma schlechteriana</i> H.Lév.        | Aganosma_schlechteriana_T LA24_contig2_hss_exon1-4  | Aganosma_schlechteriana_T LA24_hss_exon1-4  |                                            |          | Newman et al. 1069 (A)                                                                                                    | ON793194              |
| Apocyneae       | <i>Amalocalyx microlobus</i> Pierre ex Spire | Amalocalyx_microlobus                               | Amalocalyx_microlobus                       | Amalocalyx_microlobus                      | IXXXN    | Livshultz et al. 2018                                                                                                     | MG817680              |

|             |                                                         |                                                              |                                                  |                                                 |       |                                    |          |
|-------------|---------------------------------------------------------|--------------------------------------------------------------|--------------------------------------------------|-------------------------------------------------|-------|------------------------------------|----------|
| Apocynaceae | <i>Amalocalyx microlobus</i><br>Pierre ex Spire         | Amalocalyx_microlobus_TL<br>A272_contig0_hss_exon1-4         | Amalocalyx_microlobus_TL<br>A272_hss_exon1-6     | Amalocalyx_microlobus_TL<br>A272_hss_exon1-6    |       | D. J. Middleton et al.<br>2618 (A) | ON793195 |
| Apocynaceae | <i>Amalocalyx microlobus</i><br>Pierre ex Spire         | Amalocalyx_microlobus_TL<br>A272_contig1_hss_exon5-6         | Amalocalyx_microlobus_TL<br>A272_hss_exon1-6     | Amalocalyx_microlobus_TL<br>A272_hss_exon1-6    | VXXXD | D. J. Middleton et al.<br>2618 (A) | ON793196 |
| Apocynaceae | <i>Amalocalyx microlobus</i><br>Pierre ex Spire         | Amalocalyx_microlobus_TL<br>A272_contig2_dhs_exon1-7         | Amalocalyx_microlobus_TL<br>A272_dhs_exon1-7     | Amalocalyx_microlobus_TL<br>A272_dhs_exon1-7    | IXXXN | D. J. Middleton et al.<br>2618 (A) | ON793197 |
| Apocynaceae | <i>Amphineurion marginatum</i><br>(Roxb.) D.J.Middleton | Amphineurion_marginatum_<br>55_contig0_hss_exon2-7           | Amphineurion_marginatum_<br>55_hss_exon1-7       | Amphineurion_marginatum_<br>55_hss_exon1-7      | VXXXD | D. J. Middleton et al.<br>2527 (A) | ON793198 |
| Apocynaceae | <i>Amphineurion marginatum</i><br>(Roxb.) D.J.Middleton | Amphineurion_marginatum_<br>55_contig1_hss_exon1             | Amphineurion_marginatum_<br>55_hss_exon1-7       | Amphineurion_marginatum_<br>55_hss_exon1-7      |       | D. J. Middleton et al.<br>2527 (A) | ON793199 |
| Apocynaceae | <i>Amphineurion marginatum</i><br>(Roxb.) D.J.Middleton | Amphineurion_marginatum_<br>55_contig2_dhs_exon1-7           | Amphineurion_marginatum_<br>55_dhs_exon1-7       | Amphineurion_marginatum_<br>55_dhs_exon1-7      | IXXXN | D. J. Middleton et al.<br>2527 (A) | ON793200 |
| Apocynaceae | <i>Anodendron affine</i> (Hook.<br>& Arn.) Druce        | Anodendron_affine_PA79_co<br>ntig0_hss_exon1-7               | Anodendron_affine_PA79_hs<br>s1_exon1-7          | Anodendron_affine_PA79_hs<br>s1_exon1-7         | VXXXD | T. Livshultz T2014-3<br>(PH)       | ON793201 |
| Apocynaceae | <i>Anodendron affine</i> (Hook.<br>& Arn.) Druce        | Anodendron_affine_PA79_co<br>ntig1_dhs_exon1-7               | Anodendron_affine_PA79_dh<br>s_exon1-7           | Anodendron_affine_PA79_dh<br>s_exon1-7          | IXXXN | T. Livshultz T2014-3<br>(PH)       | ON793202 |
| Apocynaceae | <i>Anodendron affine</i> (Hook.<br>& Arn.) Druce        | Anodendron_affine_PA79_co<br>ntig2_hss_exon1-7               | Anodendron_affine_PA79_hs<br>s2_exon1-7          | Anodendron_affine_PA79_hs<br>s2_exon1-7         | VXXXD | T. Livshultz T2014-3<br>(PH)       | ON793203 |
| Apocynaceae | <i>Anodendron oblongifolium</i><br>Hemsl.               | Anodendron_oblongifolium_<br>1                               |                                                  |                                                 |       | Livshultz et al. 2018              | MG817676 |
| Apocynaceae | <i>Anodendron oblongifolium</i><br>Hemsl.               | Anodendron_oblongifolium_<br>2                               |                                                  |                                                 |       | Livshultz et al. 2018              | MG817675 |
| Apocynaceae | <i>Anodendron oblongifolium</i><br>Hemsl.               | Anodendron_oblongifolium_<br>PA100_contig0_hss_exon3-<br>7_ψ | Anodendron_oblongifolium_<br>PA100_hss_exon3-7_ψ |                                                 | VXXXD | W. Takeuchi 14513 (A)              | ON793204 |
| Apocynaceae | <i>Anodendron oblongifolium</i><br>Hemsl.               | Anodendron_oblongifolium_<br>PA100_contig1_hss_exon4-7       | Anodendron_oblongifolium_<br>PA100_hss_exon4-7   |                                                 | VXXXD | W. Takeuchi 14513 (A)              | ON793205 |
| Apocynaceae | <i>Anodendron oblongifolium</i><br>Hemsl.               | Anodendron_oblongifolium_<br>PA100_contig2_hss_exon1-6       | Anodendron_oblongifolium_<br>PA100_hss1_exon1-6  | Anodendron_oblongifolium_<br>PA100_hss1_exon1-6 | VXXXD | W. Takeuchi 14513 (A)              | ON793206 |
| Apocynaceae | <i>Anodendron oblongifolium</i><br>Hemsl.               | Anodendron_oblongifolium_<br>PA100_contig3_hss_exon1-2       | Anodendron_oblongifolium_<br>PA100_hss_exon1-2   |                                                 |       | W. Takeuchi 14513 (A)              | ON793207 |
| Apocynaceae | <i>Anodendron oblongifolium</i><br>Hemsl.               | Anodendron_oblongifolium_<br>PA100_contig4_hss_exon3-7       | Anodendron_oblongifolium_<br>PA100_hss2_exon3-7  | Anodendron_oblongifolium_<br>PA100_hss2_exon3-7 | VXXXD | W. Takeuchi 14513 (A)              | ON793208 |

|             |                                                  |                                                     |                                             |                                             |        |                                                                                         |                                                   |
|-------------|--------------------------------------------------|-----------------------------------------------------|---------------------------------------------|---------------------------------------------|--------|-----------------------------------------------------------------------------------------|---------------------------------------------------|
| Apocynaceae | <i>Anodendron oblongifolium</i> Hemsl.           | Anodendron_oblongifolium_PA100_contig5_dhs_exon1-7  | Anodendron_oblongifolium_PA100_dhs_exon1-7  | Anodendron_oblongifolium_PA100_dhs_exon1-7  | IXXXXN | W. Takeuchi 14513 (A)                                                                   | ON793209                                          |
| Apocynaceae | <i>Anodendron parviflorum</i> (Roxb.) I.M.Turner | Anodendron_parviflorum_1                            |                                             |                                             |        | Livshultz et al. 2018                                                                   | MG817667                                          |
| Apocynaceae | <i>Anodendron parviflorum</i> (Roxb.) I.M.Turner | Anodendron_parviflorum_2                            |                                             |                                             |        | Livshultz et al. 2018                                                                   | MG817666                                          |
| Apocynaceae | <i>Anodendron parviflorum</i> (Roxb.) I.M.Turner | Anodendron_parviflorum_TL_A135_contig0_dhs_exon1-7  | Anodendron_parviflorum_TL_A135_dhs_exon1-7  | Anodendron_parviflorum_TL_A135_dhs_exon1-7  | IXXXXN | D. J. Middleton et al. 3159 (A)                                                         | ON793210                                          |
| Apocynaceae | <i>Anodendron parviflorum</i> (Roxb.) I.M.Turner | Anodendron_parviflorum_TL_A135_contig1_hss_exon1-7  | Anodendron_parviflorum_TL_A135_hss_exon1-7  | Anodendron_parviflorum_TL_A135_hss_exon1-7  | VXXXXD | D. J. Middleton et al. 3159 (A)                                                         | ON793211                                          |
| Apocynaceae | <i>Apocynum androsaemifolium</i> L.              | Apocynum_androsaemifolium                           | Apocynum_androsaemifolium                   | Apocynum_androsaemifolium                   | IXXXXN | 1KP, <a href="http://www.onekp.com/public_data.html">www.onekp.com/public_data.html</a> | scaffold-JCLQ-2009881-Apocynum_androsaemifolium-A |
| Apocynaceae | <i>Apocynum androsaemifolium</i> L.              | Apocynum_androsaemifolium_TLA35_contig0_dhs_exon1-3 | Apocynum_androsaemifolium_TLA35_dhs_exon1-7 | Apocynum_androsaemifolium_TLA35_dhs_exon1-7 |        | T. Livshultz 03-32c (GH, BH)                                                            | ON793212                                          |
| Apocynaceae | <i>Apocynum androsaemifolium</i> L.              | Apocynum_androsaemifolium_TLA35_contig1_hss_exon6_⌋ | Apocynum_androsaemifolium_TLA35_hss_exon6_⌋ |                                             |        | T. Livshultz 03-32c (GH, BH)                                                            | ON793213                                          |
| Apocynaceae | <i>Apocynum androsaemifolium</i> L.              | Apocynum_androsaemifolium_TLA35_contig2_dhs_exon4-7 | Apocynum_androsaemifolium_TLA35_dhs_exon1-7 | Apocynum_androsaemifolium_TLA35_dhs_exon1-7 | IXXXXN | T. Livshultz 03-32c (GH, BH)                                                            | ON793214                                          |
| Apocynaceae | <i>Apocynum cannabinum</i> L.                    | Apocynum_cannabinum_44_contig0_hss_exon5-7_⌋        | Apocynum_cannabinum_44_hss_exon4-7_⌋        |                                             | VXXXXD | T. Livshultz 03-28 (BH)                                                                 | ON793215                                          |
| Apocynaceae | <i>Apocynum cannabinum</i> L.                    | Apocynum_cannabinum_44_contig1_hss_exon4-5_⌋        | Apocynum_cannabinum_44_hss_exon4-7_⌋        |                                             |        | T. Livshultz 03-28 (BH)                                                                 | ON793216                                          |
| Apocynaceae | <i>Apocynum cannabinum</i> L.                    | Apocynum_cannabinum_44_contig2_dhs_exon1-7          | Apocynum_cannabinum_44_dhs_exon1-7          | Apocynum_cannabinum_44_dhs_exon1-7          | IXXXXN | T. Livshultz 03-28 (BH)                                                                 | ON793217                                          |
| Apocynaceae | <i>Apocynum pictum</i> Schrenk                   | Apocynum_pictum_PA84_contig0_dhs_exon1-3            | Apocynum_pictum_PA84_dhs_exon1-7            | Apocynum_pictum_PA84_dhs_exon1-7            |        | F. Konta & N. Abjusalik 35598 (NY)                                                      | ON793218                                          |
| Apocynaceae | <i>Apocynum pictum</i> Schrenk                   | Apocynum_pictum_PA84_contig1_hss_exon5-6_⌋          | Apocynum_pictum_PA84_hss_exon5-6_⌋          |                                             | VXXXXD | F. Konta & N. Abjusalik 35598 (NY)                                                      | ON793219                                          |

|             |                                              |                                                    |                                            |                                            |        |                                       |          |
|-------------|----------------------------------------------|----------------------------------------------------|--------------------------------------------|--------------------------------------------|--------|---------------------------------------|----------|
| Apocynaceae | <i>Apocynum pictum</i> Schrenk               | Apocynum_pictum_PA84_c<br>ntig2_dhs_exon4-7        | Apocynum_pictum_PA84_dh<br>s_exon1-7       | Apocynum_pictum_PA84_dh<br>s_exon1-7       | IXXXN  | F. Konta & N. Abjusalik<br>35598 (NY) | ON793220 |
| Apocynaceae | <i>Apocynum venetum</i> L.                   | Apocynum_venetum_PA80_c<br>ontig0_dhs_exon4-7      | Apocynum_venetum_PA80_<br>dhs_exon1-7      | Apocynum_venetum_PA80_<br>dhs_exon1-7      | IXXXN  | M. Oganessian et al. 08-<br>0516 (NY) | ON793221 |
| Apocynaceae | <i>Apocynum venetum</i> L.                   | Apocynum_venetum_PA80_c<br>ontig1_dhs_exon1-3      | Apocynum_venetum_PA80_<br>dhs_exon1-7      | Apocynum_venetum_PA80_<br>dhs_exon1-7      |        | M. Oganessian et al. 08-<br>0516 (NY) | ON793222 |
| Apocynaceae | <i>Apocynum venetum</i> L.                   | Apocynum_venetum_PA80_c<br>ontig2_hss_exon5-6_ψ    | Apocynum_venetum_PA80_<br>hss_exon5-6_ψ    |                                            | VXXXXS | M. Oganessian et al. 08-<br>0516 (NY) | ON793223 |
| Apocynaceae | <i>Apocynum venetum</i> L.                   | Apocynum_venetum_PA82_c<br>ontig0_dhs_exon4-7      | Apocynum_venetum_PA82_<br>dhs_exon1-7      | Apocynum_venetum_PA82_<br>dhs_exon1-7      | IXXXN  | F. Konta & N. Abjusalik<br>35600 (NY) | ON793224 |
| Apocynaceae | <i>Apocynum venetum</i> L.                   | Apocynum_venetum_PA82_c<br>ontig1_hss_exon5-7_ψ    | Apocynum_venetum_PA82_<br>hss_exon5-7_ψ    |                                            | VXXXXN | F. Konta & N. Abjusalik<br>35600 (NY) | ON793225 |
| Apocynaceae | <i>Apocynum venetum</i> L.                   | Apocynum_venetum_PA82_c<br>ontig2_dhs_exon1-3      | Apocynum_venetum_PA82_<br>dhs_exon1-7      | Apocynum_venetum_PA82_<br>dhs_exon1-7      |        | F. Konta & N. Abjusalik<br>35600 (NY) | ON793226 |
| Apocynaceae | <i>Beaumontia murtonii</i> Craib             | Beaumontia_murtonii_53_co<br>ntig0_hss_exon1-6     | Beaumontia_murtonii_53_hss<br>_exon1-6     | Beaumontia_murtonii_53_hss<br>_exon1-6     | VXXXXD | D. J. Middleton et al.<br>2195 (A)    | ON793227 |
| Apocynaceae | <i>Beaumontia murtonii</i> Craib             | Beaumontia_murtonii_53_co<br>ntig1_dhs_exon1-4     | Beaumontia_murtonii_53_dh<br>s_exon1-7     | Beaumontia_murtonii_53_dh<br>s_exon1-7     |        | D. J. Middleton et al.<br>2195 (A)    | ON793228 |
| Apocynaceae | <i>Beaumontia murtonii</i> Craib             | Beaumontia_murtonii_53_co<br>ntig2_dhs_exon5-7     | Beaumontia_murtonii_53_dh<br>s_exon1-7     | Beaumontia_murtonii_53_dh<br>s_exon1-7     | IXXXN  | D. J. Middleton et al.<br>2195 (A)    | ON793229 |
| Apocynaceae | <i>Beaumontia murtonii</i> Craib             | Beaumontia_murtonii_53_co<br>ntig3_hss_exon4       | Beaumontia_murtonii_53_hss<br>_exon4       |                                            |        | D. J. Middleton et al.<br>2195 (A)    | ON793230 |
| Apocynaceae | <i>Chonemorpha fragrans</i><br>(Moon) Alston | Chonemorpha_fragrans                               |                                            |                                            | IXXXN  | Livshultz et al. 2018                 | MG817681 |
| Apocynaceae | <i>Chonemorpha fragrans</i><br>(Moon) Alston | Chonemorpha_fragrans_TLA<br>37_contig0_dhs_exon1-7 | Chonemorpha_fragrans_TLA<br>37_dhs_exon1-7 | Chonemorpha_fragrans_TLA<br>37_dhs_exon1-7 | IXXXN  | D. J. Middleton et al. 220<br>(A)     | ON793231 |

|             |                                                              |                                                        |                                                |                                                |       |                                    |          |
|-------------|--------------------------------------------------------------|--------------------------------------------------------|------------------------------------------------|------------------------------------------------|-------|------------------------------------|----------|
| Apocynaceae | <i>Chonemorpha fragrans</i><br>(Moon) Alston                 | Chonemorpha_fragrans_TLA<br>37_contig1_hss_exon5-7     | Chonemorpha_fragrans_TLA<br>37_hss_exon1-7     | Chonemorpha_fragrans_TLA<br>37_hss_exon1-7     | VXXXD | D. J. Middleton et al. 220<br>(A)  | ON793232 |
| Apocynaceae | <i>Chonemorpha fragrans</i><br>(Moon) Alston                 | Chonemorpha_fragrans_TLA<br>37_contig2_hss_exon1-3     | Chonemorpha_fragrans_TLA<br>37_hss_exon1-7     | Chonemorpha_fragrans_TLA<br>37_hss_exon1-7     |       | D. J. Middleton et al. 220<br>(A)  | ON793233 |
| Apocynaceae | <i>Epigynum auritum</i><br>(C.K.Schneid.) Tsiang &<br>P.T.Li | Epigynum_auritum                                       | Epigynum_auritum                               | Epigynum_auritum                               | IXXXN | Livshultz et al. 2018              | MG817671 |
| Apocynaceae | <i>Epigynum cochinchinensis</i><br>(Pierre) D.J. Middleton   | Epigynum_cochinchinensis_<br>TLA62_contig0_dhs_exon1-7 | Epigynum_cochinchinensis_<br>TLA62_dhs_exon1-7 | Epigynum_cochinchinensis_<br>TLA62_dhs_exon1-7 | IXXXN | D. J. Middleton et al. 209<br>(A)  | ON793234 |
| Apocynaceae | <i>Epigynum cochinchinensis</i><br>(Pierre) D.J. Middleton   | Epigynum_cochinchinensis_<br>TLA62_contig1_hss_exon1-4 | Epigynum_cochinchinensis_<br>TLA62_hss_exon1-6 | Epigynum_cochinchinensis_<br>TLA62_hss_exon1-6 |       | D. J. Middleton et al. 209<br>(A)  | ON793235 |
| Apocynaceae | <i>Epigynum cochinchinensis</i><br>(Pierre) D.J. Middleton   | Epigynum_cochinchinensis_<br>TLA62_contig2_hss_exon5-6 | Epigynum_cochinchinensis_<br>TLA62_hss_exon1-6 | Epigynum_cochinchinensis_<br>TLA62_hss_exon1-6 | VXXXD | D. J. Middleton et al. 209<br>(A)  | ON793236 |
| Apocynaceae | <i>Epigynum griffithianum</i><br>Wight                       | Epigynum_griffithianum_TL<br>A195_contig0_hss_exon1-4  | Epigynum_griffithianum_TL<br>A195_hss_exon1-6  | Epigynum_griffithianum_TL<br>A195_hss_exon1-6  |       | D. J. Middleton et al.<br>1934 (A) | ON793237 |
| Apocynaceae | <i>Epigynum griffithianum</i><br>Wight                       | Epigynum_griffithianum_TL<br>A195_contig1_hss_exon5-6  | Epigynum_griffithianum_TL<br>A195_hss_exon1-6  | Epigynum_griffithianum_TL<br>A195_hss_exon1-6  | VXXXD | D. J. Middleton et al.<br>1934 (A) | ON793238 |
| Apocynaceae | <i>Epigynum griffithianum</i><br>Wight                       | Epigynum_griffithianum_TL<br>A195_contig2_hss_exon5-6  | Epigynum_griffithianum_TL<br>A195_hss_exon1-6  | Epigynum_griffithianum_TL<br>A195_hss_exon1-6  | VXXXD | D. J. Middleton et al.<br>1934 (A) | ON793239 |
| Apocynaceae | <i>Epigynum griffithianum</i><br>Wight                       | Epigynum_griffithianum_TL<br>A195_contig3_dhs_exon1-7  | Epigynum_griffithianum_TL<br>A195_dhs_exon1-7  | Epigynum_griffithianum_TL<br>A195_dhs_exon1-7  | IXXXN | D. J. Middleton et al.<br>1934 (A) | ON793240 |
| Apocynaceae | <i>Ichnocarpus frutescens</i><br>(L.) W.T.Aiton              | Ichnocarpus_frutescens_TL6<br>21_contig0_hss_exon1-4   | Ichnocarpus_frutescens_TL6<br>21_hss_exon1-6   | Ichnocarpus_frutescens_TL6<br>21_hss_exon1-6   |       | D. J. Middleton et al.<br>5135 (E) | ON793241 |
| Apocynaceae | <i>Ichnocarpus frutescens</i><br>(L.) W.T.Aiton              | Ichnocarpus_frutescens_TL6<br>21_contig1_hss_exon5-6   | Ichnocarpus_frutescens_TL6<br>21_hss_exon1-6   | Ichnocarpus_frutescens_TL6<br>21_hss_exon1-6   | VXXXD | D. J. Middleton et al.<br>5135 (E) | ON793242 |
| Apocynaceae | <i>Ichnocarpus frutescens</i><br>(L.) W.T.Aiton              | Ichnocarpus_frutescens_TL6<br>21_contig2_dhs_exon1-7   | Ichnocarpus_frutescens_TL6<br>21_dhs_exon1-7   | Ichnocarpus_frutescens_TL6<br>21_dhs_exon1-7   | IXXXN | D. J. Middleton et al.<br>5135 (E) | ON793243 |
| Apocynaceae | <i>Papuechites aambe</i><br>(Warb.) Markgr.                  | Papuechites_aambe                                      |                                                |                                                | VXXXD | Livshultz et al. 2018              | MG817665 |
| Apocynaceae | <i>Papuechites aambe</i><br>(Warb.) Markgr.                  | Papuechites_aambe_TLA130<br>_contig0_hss_exon1-7       | Papuechites_aambe_TLA130<br>_hss_exon1-7       | Papuechites_aambe_TLA130<br>_hss_exon1-7       | VXXXD | W. Takeuchi & Ama<br>16124 (A)     | ON793244 |
| Apocynaceae | <i>Papuechites aambe</i><br>(Warb.) Markgr.                  | Papuechites_aambe_TLA130<br>_contig1_dhs_exon1-7       | Papuechites_aambe_TLA130<br>_dhs_exon1-7       | Papuechites_aambe_TLA130<br>_dhs_exon1-7       | IXXXN | W. Takeuchi & Ama<br>16124 (A)     | ON793245 |

|             |                                                               |                                                     |                                             |                                             |       |                                      |          |
|-------------|---------------------------------------------------------------|-----------------------------------------------------|---------------------------------------------|---------------------------------------------|-------|--------------------------------------|----------|
| Apocynaceae | <i>Pottsia laxiflora</i> (Blume) Kuntze                       | Pottsia_laxiflora                                   | Pottsia_laxiflora                           | Pottsia_laxiflora                           | IXXXN | Livshultz et al. 2018                | MG817686 |
| Apocynaceae | <i>Streptochites chinensis</i> (Merr.) D.J.Middleton & Livsh. | Streptochites_chinensis                             |                                             |                                             | IXXXN | Livshultz et al. 2018                | MG817692 |
| Apocynaceae | <i>Streptochites chinensis</i> (Merr.) D.J.Middleton & Livsh. | Streptochites_chinensis_54_contig0_hss_exon1-6      | Streptochites_chinensis_54_hss_exon1-6      | Streptochites_chinensis_54_hss_exon1-6      | VXXXD | D. J. Middleton et al. 2301 (A)      | ON793246 |
| Apocynaceae | <i>Streptochites chinensis</i> (Merr.) D.J.Middleton & Livsh. | Streptochites_chinensis_54_contig1_hss_exon6        | Streptochites_chinensis_54_hss_exon6        |                                             |       | D. J. Middleton et al. 2301 (A)      | ON793247 |
| Apocynaceae | <i>Streptochites chinensis</i> (Merr.) D.J.Middleton & Livsh. | Streptochites_chinensis_54_contig2_dhs_exon1-7      | Streptochites_chinensis_54_dhs_exon1-7      | Streptochites_chinensis_54_dhs_exon1-7      | IXXXN | D. J. Middleton et al. 2301 (A)      | ON793248 |
| Apocynaceae | <i>Trachelospermum asiaticum</i> (Siebold & Zucc.) Nakai      | Trachelospermum_asiaticum_PA66B_contig0_hss_exon2-4 | Trachelospermum_asiaticum_PA66B_hss_exon1-7 | Trachelospermum_asiaticum_PA66B_hss_exon1-7 |       | D. J. Middleton et al. 3355 (A)      | ON793249 |
| Apocynaceae | <i>Trachelospermum asiaticum</i> (Siebold & Zucc.) Nakai      | Trachelospermum_asiaticum_PA66B_contig1_hss_exon5-7 | Trachelospermum_asiaticum_PA66B_hss_exon1-7 | Trachelospermum_asiaticum_PA66B_hss_exon1-7 | VXXXD | D. J. Middleton et al. 3355 (A)      | ON793250 |
| Apocynaceae | <i>Trachelospermum asiaticum</i> (Siebold & Zucc.) Nakai      | Trachelospermum_asiaticum_PA66B_contig2_hss_exon1   | Trachelospermum_asiaticum_PA66B_hss_exon1-7 | Trachelospermum_asiaticum_PA66B_hss_exon1-7 |       | D. J. Middleton et al. 3355 (A)      | ON793251 |
| Apocynaceae | <i>Trachelospermum asiaticum</i> (Siebold & Zucc.) Nakai      | Trachelospermum_asiaticum_PA66B_contig3_hss_exon2-4 | Trachelospermum_asiaticum_PA66B_hss_exon1-7 | Trachelospermum_asiaticum_PA66B_hss_exon1-7 |       | D. J. Middleton et al. 3355 (A)      | ON793252 |
| Apocynaceae | <i>Trachelospermum asiaticum</i> (Siebold & Zucc.) Nakai      | Trachelospermum_asiaticum_PA66B_contig4_hss_exon5-6 | Trachelospermum_asiaticum_PA66B_hss_exon1-7 | Trachelospermum_asiaticum_PA66B_hss_exon1-7 | VXXXD | D. J. Middleton et al. 3355 (A)      | ON793253 |
| Apocynaceae | <i>Trachelospermum asiaticum</i> (Siebold & Zucc.) Nakai      | Trachelospermum_asiaticum_PA66B_contig5_dhs_exon1-7 | Trachelospermum_asiaticum_PA66B_dhs_exon1-7 | Trachelospermum_asiaticum_PA66B_dhs_exon1-7 | IXXXN | D. J. Middleton et al. 3355 (A)      | ON793254 |
| Apocynaceae | <i>Trachelospermum axillare</i> Hook.f.                       | Trachelospermum_axillare                            |                                             |                                             | IXXXN | Livshultz et al. 2018                | MG817696 |
| Apocynaceae | <i>Trachelospermum axillare</i> Hook.f.                       | Trachelospermum_axillare_T LA84_contig0_dhs_exon1-4 | Trachelospermum_axillare_T LA84_dhs_exon1-4 |                                             |       | Suksathan & D. J. Middleton 1852 (A) | ON793255 |
| Apocynaceae | <i>Trachelospermum axillare</i> Hook.f.                       | Trachelospermum_axillare_T LA84_contig1_hss_exon2-4 | Trachelospermum_axillare_T LA84_hss_exon2-7 | Trachelospermum_axillare_T LA84_hss_exon2-7 |       | Suksathan & D. J. Middleton 1852 (A) | ON793256 |
| Apocynaceae | <i>Trachelospermum axillare</i> Hook.f.                       | Trachelospermum_axillare_T LA84_contig2_hss_exon5-7 | Trachelospermum_axillare_T LA84_hss_exon2-7 | Trachelospermum_axillare_T LA84_hss_exon2-7 | VXXXD | Suksathan & D. J. Middleton 1852 (A) | ON793257 |

|              |                                                          |                                                              |                                                  |                                                |        |                                                                                                  |                                                        |
|--------------|----------------------------------------------------------|--------------------------------------------------------------|--------------------------------------------------|------------------------------------------------|--------|--------------------------------------------------------------------------------------------------|--------------------------------------------------------|
| Apocynaceae  | <i>Trachelospermum axillare</i> Hook.f.                  | Trachelospermum_axillare_T<br>LA84_contig3_dhs_exon5-<br>7_Ψ | Trachelospermum_axillare_T<br>LA84_dhs_exon5-7_Ψ |                                                | IXXXN  | Suksathan & D. J.<br>Middleton 1852 (A)                                                          | ON793258                                               |
| Apocynaceae  | <i>Trachelospermum axillare</i> Hook.f.                  | Trachelospermum_axillare_T<br>LA84_contig4_dhs_exon1-7       | Trachelospermum_axillare_T<br>LA84_dhs_exon1-7   | Trachelospermum_axillare_T<br>LA84_dhs_exon1-7 | IXXXN  | Suksathan & D. J.<br>Middleton 1852 (A)                                                          | ON793259                                               |
| Apocynaceae  | <i>Vallaris solanacea</i> (Roth)<br>Kuntze               | Vallaris_solanacea_TLA90_c<br>ontig0_hss_exon1-7             | Vallaris_solanacea_TLA90_h<br>ss_exon1-7         | Vallaris_solanacea_TLA90_h<br>ss_exon1-7       | VXXXXD | D. J. Middleton et al.<br>1704 (A)                                                               | ON793260                                               |
| Apocynaceae  | <i>Vallaris solanacea</i> (Roth)<br>Kuntze               | Vallaris_solanacea_TLA90_c<br>ontig1_dhs_exon1-4             | Vallaris_solanacea_TLA90_d<br>hs_exon1-7         | Vallaris_solanacea_TLA90_d<br>hs_exon1-7       |        | D. J. Middleton et al.<br>1704 (A)                                                               | ON793261                                               |
| Apocynaceae  | <i>Vallaris solanacea</i> (Roth)<br>Kuntze               | Vallaris_solanacea_TLA90_c<br>ontig2_dhs_exon5-7             | Vallaris_solanacea_TLA90_d<br>hs_exon1-7         | Vallaris_solanacea_TLA90_d<br>hs_exon1-7       | IXXXN  | D. J. Middleton et al.<br>1704 (A)                                                               | ON793262                                               |
| Asclepiadeae | <i>Asclepias curassavica</i> L.                          | Asclepias_curassavica                                        | Asclepias_curassavica                            | Asclepias_curassavica                          | IXXXN  | 1KP,<br><a href="http://www.onekp.com/public_data.html">www.onekp.com/public_data.html</a>       | scaffold-DSUV-<br>2056201-<br>Asclepia_curassav<br>ica |
| Asclepiadeae | <i>Asclepias syriaca</i> L.                              | Asclepias_syriaca_1_Ψ                                        | Asclepias_syriaca_1_Ψ                            |                                                | IXXXN  | Milkweed Genome<br>Project,<br><a href="http://milkweedgenome.org">http://milkweedgenome.org</a> | MG817650                                               |
| Asclepiadeae | <i>Asclepias syriaca</i> L.                              | Asclepias_syriaca_2                                          | Asclepias_syriaca_2                              | Asclepias_syriaca_2                            | IXXXN  | Milkweed Genome<br>Project,<br><a href="http://milkweedgenome.org">http://milkweedgenome.org</a> | MG817647                                               |
| Asclepiadeae | <i>Calotropis gigantea</i> (L.)<br>W.T.Aiton             | Calotropis_gigantea_dhs                                      | Calotropis_gigantea_dhs                          | Calotropis_gigantea_dhs                        | IXXXN  | Hoopes et al. 2018                                                                               |                                                        |
| Asclepiadeae | <i>Calotropis gigantea</i> (L.)<br>W.T.Aiton             | Calotropis_gigantea_hss                                      | Calotropis_gigantea_hss                          | Calotropis_gigantea_hss                        | IXXXN  | Hoopes et al. 2018                                                                               |                                                        |
| Asclepiadeae | <i>Calotropis gigantea</i> (L.)<br>W.T.Aiton             | Calotropis_gigantea_hss_Ψ                                    | Calotropis_gigantea_hss_Ψ                        |                                                | IXXXD  | Hoopes et al. 2018                                                                               |                                                        |
| Asclepiadeae | <i>Diplolepis geminiflora</i><br>(Decne.) Liede & Rapini | Diplolepis_geminiflora_36_c<br>ontig0_dhs_exon1-4            | Diplolepis_geminiflora_36_d<br>hs_exon1-7        | Diplolepis_geminiflora_36_d<br>hs_exon1-7      |        | Hansen 633 (OKLA)                                                                                | ON793263                                               |

|                  |                                                              |                                                    |                                            |                                            |       |                                           |          |
|------------------|--------------------------------------------------------------|----------------------------------------------------|--------------------------------------------|--------------------------------------------|-------|-------------------------------------------|----------|
| Asclepiadeae     | <i>Diplolepis geminiflora</i><br>(Decne.) Liede & Rapini     | Diplolepis_geminiflora_36_c<br>ontig1_hss_exon3-7  | Diplolepis_geminiflora_36_h<br>ss_exon1-7  | Diplolepis_geminiflora_36_h<br>ss_exon1-7  | IXXXN | Hansen 633 (OKLA)                         | ON793264 |
| Asclepiadeae     | <i>Diplolepis geminiflora</i><br>(Decne.) Liede & Rapini     | Diplolepis_geminiflora_36_c<br>ontig2_dhs_exon5-7  | Diplolepis_geminiflora_36_d<br>hs_exon1-7  | Diplolepis_geminiflora_36_d<br>hs_exon1-7  | IXXXN | Hansen 633 (OKLA)                         | ON793265 |
| Asclepiadeae     | <i>Diplolepis geminiflora</i><br>(Decne.) Liede & Rapini     | Diplolepis_geminiflora_36_c<br>ontig3_hss_exon1-2  | Diplolepis_geminiflora_36_h<br>ss_exon1-7  | Diplolepis_geminiflora_36_h<br>ss_exon1-7  |       | Hansen 633 (OKLA)                         | ON793266 |
| Asclepiadeae     | <i>Peplonia adnata</i><br>(E.Fourn.) U.C.S.Silva &<br>Rapini | Peplonia_adnata_PA113_cont<br>ig0_hss_exon1-7      | Peplonia_adnata_PA113_hss<br>_exon1-7      | Peplonia_adnata_PA113_hss<br>_exon1-7      | IXXXN | C. Bitencourt 440<br>(HUEFS)              | ON793267 |
| Asclepiadeae     | <i>Peplonia adnata</i><br>(E.Fourn.) U.C.S.Silva &<br>Rapini | Peplonia_adnata_PA113_cont<br>ig1_dhs_exon1-7      | Peplonia_adnata_PA113_dhs<br>_exon1-7      | Peplonia_adnata_PA113_dhs<br>_exon1-7      |       | C. Bitencourt 440<br>(HUEFS)              | ON793268 |
| Asclepiadeae     | <i>Peplonia adnata</i><br>(E.Fourn.) U.C.S.Silva &<br>Rapini | Peplonia_adnata_PA113_cont<br>ig2_dhs_exon5-7      | Peplonia_adnata_PA113_dhs<br>_exon1-7      | Peplonia_adnata_PA113_dhs<br>_exon1-7      | IXXXN | C. Bitencourt 440<br>(HUEFS)              | ON793269 |
| Asclepiadeae     | <i>Tassadia berterioanum</i><br>(Spreng.) W.D.Stevens        | Tassadia_berterioanum_PA34<br>_contig0_dhs_exon1-4 | Tassadia_berterioanum_PA34<br>_dhs_exon1-7 | Tassadia_berterioanum_PA34<br>_dhs_exon1-7 |       | Fuentes 3904 (OKLA)                       | ON793270 |
| Asclepiadeae     | <i>Tassadia berterioanum</i><br>(Spreng.) W.D.Stevens        | Tassadia_berterioanum_PA34<br>_contig1_hss_exon1-7 | Tassadia_berterioanum_PA34<br>_hss_exon1-7 | Tassadia_berterioanum_PA34<br>_hss_exon1-7 | IXXXN | Fuentes 3904 (OKLA)                       | ON793271 |
| Asclepiadeae     | <i>Tassadia berterioanum</i><br>(Spreng.) W.D.Stevens        | Tassadia_berterioanum_PA34<br>_contig2_dhs_exon5-7 | Tassadia_berterioanum_PA34<br>_dhs_exon1-7 | Tassadia_berterioanum_PA34<br>_dhs_exon1-7 | IXXXN | Fuentes 3904 (OKLA)                       | ON793272 |
| Asclepiadeae     | <i>Tassadia propinqua</i><br>Decne.                          | Tassadia_propinqua_33_conti<br>g0_hss_exon1-7_ψ    | Tassadia_propinqua_33_hss_<br>exon1-7_ψ    |                                            | IXXXN | Vieira et al. 71 (OKLA)                   | ON793273 |
| Asclepiadeae     | <i>Tassadia propinqua</i><br>Decne.                          | Tassadia_propinqua_33_conti<br>g1_dhs_exon5-7      | Tassadia_propinqua_33_dhs_<br>exon1-7      | Tassadia_propinqua_33_dhs_<br>exon1-7      | IXXXN | Vieira et al. 71 (OKLA)                   | ON793274 |
| Asclepiadeae     | <i>Tassadia propinqua</i><br>Decne.                          | Tassadia_propinqua_33_conti<br>g2_hss_exon3-7      | Tassadia_propinqua_33_hss_<br>exon3-7      | Tassadia_propinqua_33_hss_<br>exon3-7      | IXXXN | Vieira et al. 71 (OKLA)                   | ON793275 |
| Asclepiadeae     | <i>Tassadia propinqua</i><br>Decne.                          | Tassadia_propinqua_33_conti<br>g3_dhs_exon1-4      | Tassadia_propinqua_33_dhs_<br>exon1-7      | Tassadia_propinqua_33_dhs_<br>exon1-7      |       | Vieira et al. 71 (OKLA)                   | ON793276 |
| Aspidospermateae | <i>Haplophyton crooksii</i><br>(L.D.Benson) L.D.Benson       | Haplophyton_crooksii                               | Haplophyton_crooksii                       | Haplophyton_crooksii                       | IXXXN | Livshultz et al. 2018                     | MG817713 |
| Baisseeae        | <i>Baissea myrtifolia</i> (Benth.)<br>Pichon                 | Baissea_myrtifolia_TL638_c<br>ontig0_hss_exon1-7   | Baissea_myrtifolia_TL638_h<br>ss_exon1-7   | Baissea_myrtifolia_TL638_h<br>ss_exon1-7   | IXXXD | B. M. Musyoki & O. J.<br>Hansen 1004 (BR) | ON793277 |
| Baisseeae        | <i>Baissea myrtifolia</i> (Benth.)<br>Pichon                 | Baissea_myrtifolia_TL638_c<br>ontig1_dhs_exon1-4_ψ | Baissea_myrtifolia_TL638_d<br>hs_exon1-4_ψ |                                            |       | B. M. Musyoki & O. J.<br>Hansen 1004 (BR) | ON793278 |



|             |                                                   |                                                   |                                           |                                           |       |                                                                                                                                |          |
|-------------|---------------------------------------------------|---------------------------------------------------|-------------------------------------------|-------------------------------------------|-------|--------------------------------------------------------------------------------------------------------------------------------|----------|
| Baisseeae   | <i>Baissea myrtifolia</i> (Benth.) Pichon         | Baissea_myrtifolia_TL638_c<br>ontig2_dhs_exon4-7  | Baissea_myrtifolia_TL638_d<br>hs_exon4-7  |                                           | IXXXN | B. M. Musyoki & O. J. Hansen 1004 (BR)                                                                                         | ON793279 |
| Baisseeae   | <i>Baissea myrtifolia</i> (Benth.) Pichon         | Baissea_myrtifolia_TL638_c<br>ontig3_dhs_exon1-7  | Baissea_myrtifolia_TL638_d<br>hs_exon1-7  | Baissea_myrtifolia_TL638_d<br>hs_exon1-7  | IXXXN | B. M. Musyoki & O. J. Hansen 1004 (BR)                                                                                         | ON793280 |
| Baisseeae   | <i>Baissea viridiflora</i> (Schumann) de Kruif    | Baissea_viridiflora_TL622_c<br>ontig0_hss_exon1-6 | Baissea_viridiflora_TL622_h<br>ss_exon1-6 | Baissea_viridiflora_TL622_h<br>ss_exon1-6 | IXXXD | Mrs. H. M. Richards 16770 (BR)                                                                                                 | ON793281 |
| Baisseeae   | <i>Baissea viridiflora</i> (Schumann) de Kruif    | Baissea_viridiflora_TL622_c<br>ontig1_dhs_exon1-7 | Baissea_viridiflora_TL622_d<br>hs_exon1-7 | Baissea_viridiflora_TL622_d<br>hs_exon1-7 | IXXXN | Mrs. H. M. Richards 16770 (BR)                                                                                                 | ON793282 |
| Baisseeae   | <i>Oncinotis glabrata</i> (Baill.) Stapf ex Hiern | Oncinotis_glabrata_TL417_c<br>ontig0_dhs_exon1-7  | Oncinotis_glabrata_TL417_d<br>hs_exon1-7  | Oncinotis_glabrata_TL417_d<br>hs_exon1-7  | IXXXN | C. C. H. Jongkind et al. 1350 (US)                                                                                             | ON793283 |
| Baisseeae   | <i>Oncinotis glabrata</i> (Baill.) Stapf ex Hiern | Oncinotis_glabrata_TL417_c<br>ontig1_hss_exon1-7  | Oncinotis_glabrata_TL417_h<br>ss_exon1-7  | Oncinotis_glabrata_TL417_h<br>ss_exon1-7  | IXXXD | C. C. H. Jongkind et al. 1350 (US)                                                                                             | ON793284 |
| Carisseae   | <i>Carissa spinarum</i> L.                        | Carissa_spinarum                                  |                                           |                                           | IXXXN | Livshultz et al. 2018                                                                                                          | MG817712 |
| Ceropegieae | <i>Hoodia gordonii</i> Sweet ex Decne.            | Hoodia_gordonii                                   |                                           |                                           |       | Medicinal Plant Genomics Resource, <a href="http://medicinalplantgenomics.msu.edu/">http://medicinalplantgenomics.msu.edu/</a> | MF597728 |
| Echiteae    | <i>Echites turriger</i> Woodson                   | Echites_turriger                                  |                                           |                                           | IXXXN | Livshultz et al. 2018                                                                                                          | MG817668 |
| Echiteae    | <i>Echites turriger</i> Woodson                   | Echites_turriger_TLA137_co<br>ntig0_dhs_exon1-7   | Echites_turriger_TLA137_dh<br>s_exon1-7   | Echites_turriger_TLA137_dh<br>s_exon1-7   | IXXXN | W. P. Spencer & J. K. Williams 2 (SHST)                                                                                        | ON793285 |

|          |                                 |                                                     |                                           |                                          |       |                                            |          |
|----------|---------------------------------|-----------------------------------------------------|-------------------------------------------|------------------------------------------|-------|--------------------------------------------|----------|
| Echiteae | <i>Echites turriger</i> Woodson | Echites_turriger_TLA137_co<br>ntig1_hss_exon1-7     | Echites_turriger_TLA137_hs<br>s_exon1-7   | Echites_turriger_TLA137_hs<br>s_exon1-7  | VXXXD | W. P. Spencer & J. K.<br>Williams 2 (SHST) | ON793286 |
| Echiteae | <i>Echites turriger</i> Woodson | Echites_turriger_TLA137_co<br>ntig2_hss_exon5-6_⌋   | Echites_turriger_TLA137_hs<br>s_exon5-6_⌋ |                                          | VXXXD | W. P. Spencer & J. K.<br>Williams 2 (SHST) | ON793287 |
| Echiteae | <i>Echites umbellatus</i> Jacq. | Echites_umbellatus_1                                | Echites_umbellatus_1                      | Echites_umbellatus_1                     | VXXXD | Livshultz et al. 2018                      | MG817655 |
| Echiteae | <i>Echites umbellatus</i> Jacq. | Echites_umbellatus_2                                | Echites_umbellatus_2                      | Echites_umbellatus_2                     | VXXXD | Livshultz et al. 2018                      | MG817656 |
| Echiteae | <i>Echites umbellatus</i> Jacq. | Echites_umbellatus_3                                | Echites_umbellatus_3                      | Echites_umbellatus_3                     | IXXXN | Livshultz et al. 2018                      | MG817677 |
| Echiteae | <i>Echites umbellatus</i> Jacq. | Echites_umbellatus_4                                | Echites_umbellatus_4                      | Echites_umbellatus_4                     | IXXXN | Livshultz et al. 2018                      | MG817654 |
| Echiteae | <i>Echites umbellatus</i> Jacq. | Echites_umbellatus_PA74_co<br>ntig0_dhs_exon1-7     | Echites_umbellatus_PA74_dh<br>s_exon1-7   | Echites_umbellatus_PA74_dh<br>s_exon1-7  | IXXXN | S. Koptur 1176 (PH)                        | ON793295 |
| Echiteae | <i>Echites umbellatus</i> Jacq. | Echites_umbellatus_PA74_co<br>ntig1_hss_exon1-7     | Echites_umbellatus_PA74_hs<br>s_exon1-7   | Echites_umbellatus_PA74_hs<br>s_exon1-7  | VXXXD | S. Koptur 1176 (PH)                        | ON793296 |
| Echiteae | <i>Echites umbellatus</i> Jacq. | Echites_umbellatus_PA74_co<br>ntig2_hss_exon4-5_⌋   | Echites_umbellatus_PA74_hs<br>s_exon4-5_⌋ |                                          |       | S. Koptur 1176 (PH)                        | ON793297 |
| Echiteae | <i>Echites umbellatus</i> Jacq. | Echites_umbellatus_PA76_co<br>ntig0_dhs_exon1-7     | Echites_umbellatus_PA76_dh<br>s1_exon1-7  | Echites_umbellatus_PA76_dh<br>s1_exon1-7 | IXXXN | S. Koptur 1176 (PH)                        | ON793290 |
| Echiteae | <i>Echites umbellatus</i> Jacq. | Echites_umbellatus_PA76_co<br>ntig1_hss_contig1-7   | Echites_umbellatus_PA76_hs<br>s1_exon1-7  | Echites_umbellatus_PA76_hs<br>s1_exon1-7 | VXXXD | S. Koptur 1176 (PH)                        | ON793291 |
| Echiteae | <i>Echites umbellatus</i> Jacq. | Echites_umbellatus_PA76_co<br>ntig2_hss_contig4-5_⌋ | Echites_umbellatus_PA76_hs<br>s_exon4-5_⌋ |                                          |       | S. Koptur 1176 (PH)                        | ON793292 |
| Echiteae | <i>Echites umbellatus</i> Jacq. | Echites_umbellatus_PA76_co<br>ntig3_hss_contig1-7   | Echites_umbellatus_PA76_hs<br>s2_exon1-7  | Echites_umbellatus_PA76_hs<br>s2_exon1-7 | VXXXD | S. Koptur 1176 (PH)                        | ON793293 |
| Echiteae | <i>Echites umbellatus</i> Jacq. | Echites_umbellatus_PA76_co<br>ntig4_dhs_exon1-7     | Echites_umbellatus_PA76_dh<br>s2_exon1-7  | Echites_umbellatus_PA76_dh<br>s2_exon1-7 | IXXXN | S. Koptur 1176 (PH)                        | ON793294 |
| Echiteae | <i>Echites umbellatus</i> Jacq. | Echites_umbellatus_PA86_co<br>ntig0_hss_exon1-7     | Echites_umbellatus_PA86_hs<br>s_exon1-7   | Echites_umbellatus_PA86_hs<br>s_exon1-7  | VXXXD | S. Koptur 1176 (PH)                        | ON793288 |

|          |                                                                      |                                                    |                                            |                                            |       |                                 |          |
|----------|----------------------------------------------------------------------|----------------------------------------------------|--------------------------------------------|--------------------------------------------|-------|---------------------------------|----------|
| Echiteae | <i>Echites umbellatus</i> Jacq.                                      | Echites_umbellatus_PA86_contig1_dhs_exon1-7        | Echites_umbellatus_PA86_dhs_exon1-7        | Echites_umbellatus_PA86_dhs_exon1-7        | IXXXN | S. Koptur 1176 (PH)             | ON793289 |
| Echiteae | <i>Echites woodsonianus</i> Monach.                                  | Echites_woodsonianus                               |                                            |                                            | VXXXD | Livshultz et al. 2018           | MG817658 |
| Echiteae | <i>Echites woodsonianus</i> Monach.                                  | Echites_woodsonianus_2                             | Echites_woodsonianus_2                     | Echites_woodsonianus_2                     | IXXXN | Livshultz et al. 2018           | MG817657 |
| Echiteae | <i>Laubertia boissieri</i> A.DC.                                     | Laubertia_boissieri_TL220_contig0_dhs_exon1-7      | Laubertia_boissieri_TL220_dhs_exon1-7      | Laubertia_boissieri_TL220_dhs_exon1-7      | IXXXN | R. Seidel & E. Vargas 1103 (MO) | ON793298 |
| Echiteae | <i>Laubertia boissieri</i> A.DC.                                     | Laubertia_boissieri_TL220_contig1_hss_exon1-7      | Laubertia_boissieri_TL220_hss_exon1-7      | Laubertia_boissieri_TL220_hss_exon1-7      | VXXXD | R. Seidel & E. Vargas 1103 (MO) | ON793299 |
| Echiteae | <i>Laubertia boissieri</i> A.DC.                                     | Laubertia_boissieri_TL220_contig2_dhs_exon3_ψ      | Laubertia_boissieri_TL220_dhs_exon3_ψ      |                                            |       | R. Seidel & E. Vargas 1103 (MO) | ON793300 |
| Echiteae | <i>Macropharynx peltata</i> (Vell.) J.F.Morales, M.E.Endress & Liede | Macropharynx_peltata_49_contig0_hss_exon1-7        | Macropharynx_peltata_49_hss_exon1-7        | Macropharynx_peltata_49_hss_exon1-7        | VXXXD | F. Billiet S3526 (BR)           | ON793301 |
| Echiteae | <i>Macropharynx peltata</i> (Vell.) J.F.Morales, M.E.Endress & Liede | Macropharynx_peltata_49_contig1_dhs_exon1-7        | Macropharynx_peltata_49_dhs_exon1-7        | Macropharynx_peltata_49_dhs_exon1-7        | IXXXN | F. Billiet S3526 (BR)           | ON793302 |
| Echiteae | <i>Macropharynx spectabilis</i> (Stadelm.) Woodson                   | Macropharynx_spectabilis_TL210_contig0_hss_exon1-7 | Macropharynx_spectabilis_TL210_hss_exon1-7 | Macropharynx_spectabilis_TL210_hss_exon1-7 | VXXXD | M. Nee 46049 (NY)               | ON793303 |
| Echiteae | <i>Macropharynx spectabilis</i> (Stadelm.) Woodson                   | Macropharynx_spectabilis_TL210_contig1_dhs_exon1-4 | Macropharynx_spectabilis_TL210_dhs_exon1-7 | Macropharynx_spectabilis_TL210_dhs_exon1-7 |       | M. Nee 46049 (NY)               | ON793304 |
| Echiteae | <i>Macropharynx spectabilis</i> (Stadelm.) Woodson                   | Macropharynx_spectabilis_TL210_contig2_dhs_exon5-7 | Macropharynx_spectabilis_TL210_dhs_exon1-7 | Macropharynx_spectabilis_TL210_dhs_exon1-7 | IXXXN | M. Nee 46049 (NY)               | ON793305 |
| Echiteae | <i>Macropharynx spectabilis</i> (Stadelm.) Woodson                   | Macropharynx_spectabilis_TL210_contig3_hss_exon2-3 | Macropharynx_spectabilis_TL210_hss_exon2-3 |                                            |       | M. Nee 46049 (NY)               | ON793306 |
| Echiteae | <i>Parsonsia alboflavescens</i> (Dennst.) Mabb.                      | Parsonsia_alboflavescens_DS                        |                                            |                                            | IXXXN | Livshultz et al. 2018           | MG817648 |
| Echiteae | <i>Parsonsia alboflavescens</i> (Dennst.) Mabb.                      | Parsonsia_alboflavescens_HS                        |                                            |                                            | VXXXD | Livshultz et al. 2018           | MG817649 |
| Echiteae | <i>Parsonsia alboflavescens</i> (Dennst.) Mabb.                      | Parsonsia_alboflavescens_HS_ORF                    |                                            |                                            | VXXXD | Livshultz et al. 2018           | MG873186 |

|          |                                                                  |                                                    |                                            |                                            |       |                              |          |
|----------|------------------------------------------------------------------|----------------------------------------------------|--------------------------------------------|--------------------------------------------|-------|------------------------------|----------|
| Echiteae | <i>Parsonsia alboflavescens</i> (Dennst.) Mabb.                  | Parsonsia_alboflavescens_PA_90_contig0_hss_exon1-7 | Parsonsia_alboflavescens_PA_90_hss_exon1-7 | Parsonsia_alboflavescens_PA_90_hss_exon1-7 | VXXXD | T. Livshultz 2011-14 (PH)    | ON793307 |
| Echiteae | <i>Parsonsia alboflavescens</i> (Dennst.) Mabb.                  | Parsonsia_alboflavescens_PA_90_contig1_dhs_exon1-4 | Parsonsia_alboflavescens_PA_90_dhs_exon1-7 | Parsonsia_alboflavescens_PA_90_dhs_exon1-7 |       | T. Livshultz 2011-14 (PH)    | ON793308 |
| Echiteae | <i>Parsonsia alboflavescens</i> (Dennst.) Mabb.                  | Parsonsia_alboflavescens_PA_90_contig2_dhs_exon5-7 | Parsonsia_alboflavescens_PA_90_dhs_exon1-7 | Parsonsia_alboflavescens_PA_90_dhs_exon1-7 | IXXXN | T. Livshultz 2011-14 (PH)    | ON793309 |
| Echiteae | <i>Parsonsia alboflavescens</i> (Dennst.) Mabb.                  | Parsonsia_alboflavescens_PA_90_contig3_hss_exon3_↓ | Parsonsia_alboflavescens_PA_90_hss_exon3_↓ |                                            |       | T. Livshultz 2011-14 (PH)    | ON793310 |
| Echiteae | <i>Parsonsia eucalyptophylla</i> F.Muell.                        | Parsonsia_eucalyptophylla_1                        | Parsonsia_eucalyptophylla_1                | Parsonsia_eucalyptophylla_1                | VXXXD | Livshultz et al. 2018        | MG817688 |
| Echiteae | <i>Parsonsia eucalyptophylla</i> F.Muell.                        | Parsonsia_eucalyptophylla_2                        | Parsonsia_eucalyptophylla_2                | Parsonsia_eucalyptophylla_2                | VXXXD | Livshultz et al. 2018        | MG817689 |
| Echiteae | <i>Prestonia coalita</i> (Vell.) Woodson                         | Prestonia_coalita_1                                | Prestonia_coalita_1                        | Prestonia_coalita_1                        | VXXXD | Livshultz et al. 2018        | MG817652 |
| Echiteae | <i>Prestonia coalita</i> (Vell.) Woodson                         | Prestonia_coalita_2                                | Prestonia_coalita_2                        | Prestonia_coalita_2                        | VXXXD | Livshultz et al. 2018        | MG817653 |
| Echiteae | <i>Prestonia coalita</i> (Vell.) Woodson                         | Prestonia_coalita_3                                | Prestonia_coalita_3                        | Prestonia_coalita_3                        | IXXXN | Livshultz et al. 2018        | MG817664 |
| Echiteae | <i>Prestonia portobellensis</i> (Beurl.) Woodson                 | Prestonia_portobellensis_51_contig0_hss_exon4-7    | Prestonia_portobellensis_51_hss_exon1-7    | Prestonia_portobellensis_51_hss_exon1-7    | VXXXD | F. Ventura 21262 (NY)        | ON793311 |
| Echiteae | <i>Prestonia portobellensis</i> (Beurl.) Woodson                 | Prestonia_portobellensis_51_contig1_hss_exon1-3    | Prestonia_portobellensis_51_hss_exon1-7    | Prestonia_portobellensis_51_hss_exon1-7    |       | F. Ventura 21262 (NY)        | ON793312 |
| Echiteae | <i>Prestonia portobellensis</i> (Beurl.) Woodson                 | Prestonia_portobellensis_51_contig2_hss_exon6      | Prestonia_portobellensis_51_hss_exon6      |                                            |       | F. Ventura 21262 (NY)        | ON793313 |
| Echiteae | <i>Prestonia portobellensis</i> (Beurl.) Woodson                 | Prestonia_portobellensis_51_contig3_dhs_exon4-7    | Prestonia_portobellensis_51_dhs_exon4-7    |                                            | IXXXN | F. Ventura 21262 (NY)        | ON793314 |
| Echiteae | <i>Prestonia portobellensis</i> (Beurl.) Woodson                 | Prestonia_portobellensis_51_contig4_dhs_exon1-7    | Prestonia_portobellensis_51_dhs_exon1-7    | Prestonia_portobellensis_51_dhs_exon1-7    | IXXXN | F. Ventura 21262 (NY)        | ON793315 |
| Echiteae | <i>Rhodocalyx riedelii</i> (Müll.Arg.) J.F.Morales & M.E.Endress | Rhodocalyx_riedelii_TL205_contig0_hss_exon1-7      | Rhodocalyx_riedelii_TL205_hss_exon1-7      | Rhodocalyx_riedelii_TL205_hss_exon1-7      | VXXXD | Solomon & Escobar 12465 (NY) | ON793316 |

|              |                                                                        |                                                         |                                                 |                                                 |       |                                           |          |
|--------------|------------------------------------------------------------------------|---------------------------------------------------------|-------------------------------------------------|-------------------------------------------------|-------|-------------------------------------------|----------|
| Echiteae     | <i>Rhodocalyx riedelii</i><br>(Müll.Arg.) J.F.Morales &<br>M.E.Endress | Rhodocalyx_riedelii_TL205_<br>contig1_dhs_exon1-7       | Rhodocalyx_riedelii_TL205_<br>dhs_exon1-7       | Rhodocalyx_riedelii_TL205_<br>dhs_exon1-7       | IXXXN | Solomon & Escobar<br>12465 (NY)           | ON793317 |
| Echiteae     | <i>Rhodocalyx rotundifolius</i><br>Müll.Arg.                           | Rhodocalyx_rotundifolius_P<br>A109b_contig0_dhs_exon1-7 | Rhodocalyx_rotundifolius_P<br>A109b_dhs_exon1-7 | Rhodocalyx_rotundifolius_P<br>A109b_dhs_exon1-7 | IXXXN | C. O. Dourados 169<br>(HUEFS)             | ON793318 |
| Echiteae     | <i>Rhodocalyx rotundifolius</i><br>Müll.Arg.                           | Rhodocalyx_rotundifolius_P<br>A109b_contig1_hss_exon1-7 | Rhodocalyx_rotundifolius_P<br>A109b_hss_exon1-7 | Rhodocalyx_rotundifolius_P<br>A109b_hss_exon1-7 | VXXXD | C. O. Dourados 169<br>(HUEFS)             | ON793319 |
| Echiteae     | <i>Rhodocalyx rotundifolius</i><br>Müll.Arg.                           | Rhodocalyx_rotundifolius_P<br>A109b_contig2_hss_exon1-5 | Rhodocalyx_rotundifolius_P<br>A109b_hss_exon1-5 |                                                 |       | C. O. Dourados 169<br>(HUEFS)             | ON793320 |
| Echiteae     | <i>Temnadenia odorifera</i><br>(Vell.) J.F.Morales                     | Temnadenia_odorifera_TL21<br>3_contig0_hss_exon3-7      | Temnadenia_odorifera_TL21<br>3_hss_exon3-7      |                                                 | VXXXD | A. O. Simões & R. B.<br>Singer 1035 (UEC) | ON793321 |
| Echiteae     | <i>Temnadenia odorifera</i><br>(Vell.) J.F.Morales                     | Temnadenia_odorifera_TL21<br>3_contig1_hss_exon1-7      | Temnadenia_odorifera_TL21<br>3_hss_exon1-7      | Temnadenia_odorifera_TL21<br>3_hss_exon1-7      | VXXXD | A. O. Simões & R. B.<br>Singer 1035 (UEC) | ON793322 |
| Echiteae     | <i>Temnadenia odorifera</i><br>(Vell.) J.F.Morales                     | Temnadenia_odorifera_TL21<br>3_contig2_dhs_exon1-7      | Temnadenia_odorifera_TL21<br>3_dhs_exon1-7      | Temnadenia_odorifera_TL21<br>3_dhs_exon1-7      | IXXXN | A. O. Simões & R. B.<br>Singer 1035 (UEC) | ON793323 |
| Fockeeae     | <i>Fockea edulis</i> (Thunb.)<br>K.Schum                               | Fockea_edulis                                           |                                                 |                                                 | IXXXN | Livshultz et al. 2018                     | MG817697 |
| Fockeeae     | <i>Fockea edulis</i> (Thunb.)<br>K.Schum                               | Fockea_edulis_TL184_contig<br>0_dhs_exon1-4             | Fockea_edulis_TL184_dhs_e<br>xon1-7             | Fockea_edulis_TL184_dhs_e<br>xon1-7             |       | T. Livshultz s.n.<br>31.III.1998 (BH)     | ON793324 |
| Fockeeae     | <i>Fockea edulis</i> (Thunb.)<br>K.Schum                               | Fockea_edulis_TL184_contig<br>1_hss_exon1-5             | Fockea_edulis_TL184_hss_e<br>xon1-7             | Fockea_edulis_TL184_hss_e<br>xon1-7             |       | T. Livshultz s.n.<br>31.III.1998 (BH)     | ON793325 |
| Fockeeae     | <i>Fockea edulis</i> (Thunb.)<br>K.Schum                               | Fockea_edulis_TL184_contig<br>2_dhs_exon5-7             | Fockea_edulis_TL184_dhs_e<br>xon1-7             | Fockea_edulis_TL184_dhs_e<br>xon1-7             | IXXXN | T. Livshultz s.n.<br>31.III.1998 (BH)     | ON793326 |
| Fockeeae     | <i>Fockea edulis</i> (Thunb.)<br>K.Schum                               | Fockea_edulis_TL184_contig<br>3_hss_exon6-7             | Fockea_edulis_TL184_hss_e<br>xon1-7             | Fockea_edulis_TL184_hss_e<br>xon1-7             | IXXXD | T. Livshultz s.n.<br>31.III.1998 (BH)     | ON793327 |
| Gelsemiaceae | <i>Gelsemium sempervirens</i><br>(L.) J.St.-Hil.                       | Gelsemium_sempervirens_32<br>_contig0_dhs_exon4-7       | Gelsemium_sempervirens_32<br>_dhs_exon1-7       | Gelsemium_sempervirens_32<br>_dhs_exon1-7       | IXXXN | M. Fishbein 7665<br>(OKLA)                | ON793328 |
| Gelsemiaceae | <i>Gelsemium sempervirens</i><br>(L.) J.St.-Hil.                       | Gelsemium_sempervirens_32<br>_contig1_dhs_exon1-3       | Gelsemium_sempervirens_32<br>_dhs_exon1-7       | Gelsemium_sempervirens_32<br>_dhs_exon1-7       |       | M. Fishbein 7665<br>(OKLA)                | ON793329 |

|              |                                                       |                                                      |                                              |                                              |       |                                  |          |
|--------------|-------------------------------------------------------|------------------------------------------------------|----------------------------------------------|----------------------------------------------|-------|----------------------------------|----------|
| Gelsemiaceae | <i>Gelsemium sempervirens</i> (L.) J.St.-Hil.         | Gelsemium_sempervirens_32_contig2_dhs_exon1-3        | Gelsemium_sempervirens_32_dhs_exon1-7        | Gelsemium_sempervirens_32_dhs_exon1-7        |       | M. Fishbein 7665 (OKLA)          | ON793330 |
| Hunterieae   | <i>Hunteria zeylanica</i> (Retz.) Gardner ex Thwaites | Hunteria_zeylanica                                   |                                              |                                              | IXXXN | Livshultz et al. 2018            | MG817709 |
| Hunterieae   | <i>Hunteria zeylanica</i> (Retz.) Gardner ex Thwaites | Hunteria_zeylanica_67c_contig0_dhs_exon1-4           | Hunteria_zeylanica_67c_dhs_exon1-7           | Hunteria_zeylanica_67c_dhs_exon1-7           |       | D. J. Middleton et al. 3816 ( E) | ON793331 |
| Hunterieae   | <i>Hunteria zeylanica</i> (Retz.) Gardner ex Thwaites | Hunteria_zeylanica_67c_contig1_dhs_exon5-7           | Hunteria_zeylanica_67c_dhs_exon1-7           | Hunteria_zeylanica_67c_dhs_exon1-7           | IXXXN | D. J. Middleton et al. 3816 ( E) | ON793332 |
| Malouetieae  | <i>Eucorymbia alba</i> Stapf                          | Eucorymbia_alba_PA104_contig0_hss_exon1-6            | Eucorymbia_alba_PA104_hss_exon1-6            | Eucorymbia_alba_PA104_hss_exon1-6            | VXXXD | P. Chai 38575 (L)                | ON793333 |
| Malouetieae  | <i>Eucorymbia alba</i> Stapf                          | Eucorymbia_alba_PA104_contig1_dhs_exon1-7            | Eucorymbia_alba_PA104_dhs_exon1-7            | Eucorymbia_alba_PA104_dhs_exon1-7            | IXXXN | P. Chai 38575 (L)                | ON793334 |
| Malouetieae  | <i>Funtumia elastica</i> (Preuss) Stapf               | Funtumia_elastica_TLA144_contig0_hss_exon1-7         | Funtumia_elastica_TLA144_hss_exon1-7         | Funtumia_elastica_TLA144_hss_exon1-7         | VXXXD | V. Leyman S3927 (BR)             | ON793335 |
| Malouetieae  | <i>Funtumia elastica</i> (Preuss) Stapf               | Funtumia_elastica_TLA144_contig1_dhs_exon1           | Funtumia_elastica_TLA144_dhs_exon1           |                                              |       | V. Leyman S3927 (BR)             | ON793336 |
| Malouetieae  | <i>Funtumia elastica</i> (Preuss) Stapf               | Funtumia_elastica_TLA144_contig2_hss_exon2_ψ         | Funtumia_elastica_TLA144_hss_exon2_ψ         |                                              |       | V. Leyman S3927 (BR)             | ON793337 |
| Malouetieae  | <i>Funtumia elastica</i> (Preuss) Stapf               | Funtumia_elastica_TLA144_contig3_dhs_exon1-7         | Funtumia_elastica_TLA144_dhs1_exon1-7        | Funtumia_elastica_TLA144_dhs1_exon1-7        | IXXXN | V. Leyman S3927 (BR)             | ON793338 |
| Malouetieae  | <i>Funtumia elastica</i> (Preuss) Stapf               | Funtumia_elastica_TLA144_contig4_dhs_exon1-7         | Funtumia_elastica_TLA144_dhs2_exon1-7        | Funtumia_elastica_TLA144_dhs2_exon1-7        | IXXXN | V. Leyman S3927 (BR)             | ON793339 |
| Malouetieae  | <i>Galactophora schomburgkiana</i> Woodson            | Galactophora_schomburgkiana                          |                                              |                                              | VXXXD | Livshultz et al. 2018            | MG817661 |
| Malouetieae  | <i>Galactophora schomburgkiana</i> Woodson            | Galactophora_schomburgkiana_PA87_contig0_hss_exon1-7 | Galactophora_schomburgkiana_PA87_hss_exon1-7 | Galactophora_schomburgkiana_PA87_hss_exon1-7 | VXXXD | F. Michelangeli 516 (VEN, PORT)  | ON793340 |
| Malouetieae  | <i>Galactophora schomburgkiana</i> Woodson            | Galactophora_schomburgkiana_PA87_contig1_dhs_exon1-3 | Galactophora_schomburgkiana_PA87_dhs_exon1-7 | Galactophora_schomburgkiana_PA87_dhs_exon1-7 |       | F. Michelangeli 516 (VEN, PORT)  | ON793341 |
| Malouetieae  | <i>Galactophora schomburgkiana</i> Woodson            | Galactophora_schomburgkiana_PA87_contig2_dhs_exon5-7 | Galactophora_schomburgkiana_PA87_dhs_exon1-7 | Galactophora_schomburgkiana_PA87_dhs_exon1-7 | IXXXN | F. Michelangeli 516 (VEN, PORT)  | ON793342 |

|             |                                                       |                                                     |                                              |                                              |       |                                                                                         |                                            |
|-------------|-------------------------------------------------------|-----------------------------------------------------|----------------------------------------------|----------------------------------------------|-------|-----------------------------------------------------------------------------------------|--------------------------------------------|
| Malouetieae | <i>Galactophora schomburgkiana</i> Woodson            | Galactophora_schomburgkiana_PA87_contig3_dhs_exon4  | Galactophora_schomburgkiana_PA87_dhs_exon1-7 | Galactophora_schomburgkiana_PA87_dhs_exon1-7 |       | F. Michelangeli 516 (VEN, PORT)                                                         | ON793343                                   |
| Malouetieae | <i>Holarrhena curtisii</i> King & Gamble              | Holarrhena_curtisii_1                               |                                              |                                              | VXXXD | Livshultz et al. 2018                                                                   | MG817674                                   |
| Malouetieae | <i>Holarrhena curtisii</i> King & Gamble              | Holarrhena_curtisii_2                               |                                              |                                              | IXXXN | Livshultz et al. 2018                                                                   | MG817673                                   |
| Malouetieae | <i>Holarrhena curtisii</i> King & Gamble              | Holarrhena_curtisii_TLA17_contig0_dhs_exon1-4       | Holarrhena_curtisii_TLA17_dhs_exon1-7        | Holarrhena_curtisii_TLA17_dhs_exon1-7        |       | D. J. Middleton et al. 2042 (A)                                                         | ON793344                                   |
| Malouetieae | <i>Holarrhena curtisii</i> King & Gamble              | Holarrhena_curtisii_TLA17_contig1_dhs_exon5-7       | Holarrhena_curtisii_TLA17_dhs_exon1-7        | Holarrhena_curtisii_TLA17_dhs_exon1-7        | IXXXN | D. J. Middleton et al. 2042 (A)                                                         | ON793345                                   |
| Malouetieae | <i>Holarrhena curtisii</i> King & Gamble              | Holarrhena_curtisii_TLA17_contig2_hss_exon1-3       | Holarrhena_curtisii_TLA17_hss_exon1-7        | Holarrhena_curtisii_TLA17_hss_exon1-7        |       | D. J. Middleton et al. 2042 (A)                                                         | ON793346                                   |
| Malouetieae | <i>Holarrhena curtisii</i> King & Gamble              | Holarrhena_curtisii_TLA17_contig3_hss_exon4-7       | Holarrhena_curtisii_TLA17_hss_exon1-7        | Holarrhena_curtisii_TLA17_hss_exon1-7        | VXXXD | D. J. Middleton et al. 2042 (A)                                                         | ON793347                                   |
| Malouetieae | <i>Holarrhena pubescens</i> Wall. ex G.Don            | Holarrhena_pubescens_1                              |                                              |                                              | IXXXN | Livshultz et al. 2018                                                                   | MG817683                                   |
| Malouetieae | <i>Holarrhena pubescens</i> Wall. ex G.Don            | Holarrhena_pubescens_2                              | Holarrhena_pubescens_2                       | Holarrhena_pubescens_2                       | IXXXN | 1KP, <a href="http://www.onekp.com/public_data.html">www.onekp.com/public_data.html</a> | scaffold-JGYZ-2005525-Holarrhena_pubescens |
| Malouetieae | <i>Kibatalia macrophylla</i> (Pierre ex Hua) Woodson  | Kibatalia_macrophylla_TLA18_contig0_dhs_exon1-7     | Kibatalia_macrophylla_TLA18_dhs1_exon1-7     | Kibatalia_macrophylla_TLA18_dhs1_exon1-7     | IXXXN | D. J. Middleton et al. 1018 (A)                                                         | ON793348                                   |
| Malouetieae | <i>Kibatalia macrophylla</i> (Pierre ex Hua) Woodson  | Kibatalia_macrophylla_TLA18_contig1_hss_exon1-7     | Kibatalia_macrophylla_TLA18_hss_exon1-7      | Kibatalia_macrophylla_TLA18_hss_exon1-7      | VXXXD | D. J. Middleton et al. 1018 (A)                                                         | ON793349                                   |
| Malouetieae | <i>Kibatalia macrophylla</i> (Pierre ex Hua) Woodson  | Kibatalia_macrophylla_TLA18_contig2_dhs_exon1-4     | Kibatalia_macrophylla_TLA18_dhs2_exon1-7     | Kibatalia_macrophylla_TLA18_dhs2_exon1-7     |       | D. J. Middleton et al. 1018 (A)                                                         | ON793350                                   |
| Malouetieae | <i>Kibatalia macrophylla</i> (Pierre ex Hua) Woodson  | Kibatalia_macrophylla_TLA18_contig3_dhs_exon5-7     | Kibatalia_macrophylla_TLA18_dhs2_exon1-7     | Kibatalia_macrophylla_TLA18_dhs2_exon1-7     | IXXXN | D. J. Middleton et al. 1018 (A)                                                         | ON793351                                   |
| Malouetieae | <i>Malouetiella mildbraedii</i> (Gilg & Stapf) Pichon | Malouetiella_mildbraedii_TLA246_contig0_hss_exon1-7 | Malouetiella_mildbraedii_TLA246_hss_exon1-7  | Malouetiella_mildbraedii_TLA246_hss_exon1-7  | VXXXD | van Meer 1785 (MO)                                                                      | ON793352                                   |
| Malouetieae | <i>Malouetiella mildbraedii</i> (Gilg & Stapf) Pichon | Malouetiella_mildbraedii_TLA246_contig1_dhs_exon5-7 | Malouetiella_mildbraedii_TLA246_dhs_exon5-7  |                                              | IXXXN | van Meer 1785 (MO)                                                                      | ON793353                                   |

|             |                                                          |                                                               |                                                   |                                                  |       |                         |          |
|-------------|----------------------------------------------------------|---------------------------------------------------------------|---------------------------------------------------|--------------------------------------------------|-------|-------------------------|----------|
| Malouetieae | <i>Malouetiella mildbraedii</i><br>(Gilg & Stapf) Pichon | Malouetiella_mildbraedii_TL<br>A246_contig2_hss_exon2-<br>3_Ψ | Malouetiella_mildbraedii_TL<br>A246_hss_exon2-3_Ψ |                                                  |       | van Meer 1785 (MO)      | ON793354 |
| Malouetieae | <i>Malouetiella mildbraedii</i><br>(Gilg & Stapf) Pichon | Malouetiella_mildbraedii_TL<br>A246_contig3_dhs_exon3-4       | Malouetiella_mildbraedii_TL<br>A246_dhs_exon3-4   |                                                  |       | van Meer 1785 (MO)      | ON793355 |
| Malouetieae | <i>Malouetiella mildbraedii</i><br>(Gilg & Stapf) Pichon | Malouetiella_mildbraedii_TL<br>A246_contig4_dhs_exon1-7       | Malouetiella_mildbraedii_TL<br>A246_dhs_exon1-7   | Malouetiella_mildbraedii_TL<br>A246_dhs_exon1-7  | IXXXN | van Meer 1785 (MO)      | ON793356 |
| Malouetieae | <i>Mascarenhasia<br/>arborescens</i> A.DC.               | Mascarenhasia_arborescens_<br>TLA143_contig0_hss_exon1-<br>7  | Mascarenhasia_arborescens_<br>TLA143_hss_exon1-7  | Mascarenhasia_arborescens_<br>TLA143_hss_exon1-7 | VXXXD | F. Billiet S3053 (BR)   | ON793357 |
| Malouetieae | <i>Mascarenhasia<br/>arborescens</i> A.DC.               | Mascarenhasia_arborescens_<br>TLA143_contig1_dhs_exon1-<br>4  | Mascarenhasia_arborescens_<br>TLA143_dhs_exon1-7  | Mascarenhasia_arborescens_<br>TLA143_dhs_exon1-7 |       | F. Billiet S3053 (BR)   | ON793358 |
| Malouetieae | <i>Mascarenhasia<br/>arborescens</i> A.DC.               | Mascarenhasia_arborescens_<br>TLA143_contig2_dhs_exon5-<br>7  | Mascarenhasia_arborescens_<br>TLA143_dhs_exon1-7  | Mascarenhasia_arborescens_<br>TLA143_dhs_exon1-7 | IXXXN | F. Billiet S3053 (BR)   | ON793359 |
| Malouetieae | <i>Neobraccia valenzuelana</i><br>(A.Rich.) Urb.         | Neobraccia_valenzuelana                                       | Neobraccia_valenzuelana                           | Neobraccia_valenzuelana                          | IXXXN | Livshultz et al. 2018   | MG817685 |
| Malouetieae | <i>Pachypodium baronii</i><br>Costantin & Bois           | Pachypodium_baronii                                           |                                                   |                                                  | IXXXN | Livshultz et al. 2018   | MG817695 |
| Malouetieae | <i>Pachypodium baronii</i><br>Costantin & Bois           | Pachypodium_baronii_47_co<br>ntig0_hss_exon5-6_Ψ              | Pachypodium_baronii_47_hss<br>_exon5-6_Ψ          |                                                  | IXXXD | T. Livshultz 03_20 (BH) | ON793360 |
| Malouetieae | <i>Pachypodium baronii</i><br>Costantin & Bois           | Pachypodium_baronii_47_co<br>ntig1_hss_exon1-2                | Pachypodium_baronii_47_hss<br>_exon1-2            |                                                  |       | T. Livshultz 03_20 (BH) | ON793361 |
| Malouetieae | <i>Pachypodium baronii</i><br>Costantin & Bois           | Pachypodium_baronii_47_co<br>ntig2_hss_exon3                  | Pachypodium_baronii_47_hss<br>_exon3              |                                                  |       | T. Livshultz 03_20 (BH) | ON793362 |
| Malouetieae | <i>Pachypodium baronii</i><br>Costantin & Bois           | Pachypodium_baronii_47_co<br>ntig3_dhs_exon1-7                | Pachypodium_baronii_47_dh<br>s_exon1-7            | Pachypodium_baronii_47_dh<br>s_exon1-7           | IXXXN | T. Livshultz 03_20 (BH) | ON793363 |
| Marsdenieae | <i>Anisopus efulensis</i><br>(N.E.Br.) Goyder            | Anisopus_efulensis_TL386_c<br>ontig0_hss_exon1-7              | Anisopus_efulensis_TL386_h<br>ss_exon1-7          | Anisopus_efulensis_TL386_h<br>ss_exon1-7         | IXXXD | J. J. Wheatley 65 (MO)  | ON793364 |
| Marsdenieae | <i>Anisopus efulensis</i><br>(N.E.Br.) Goyder            | Anisopus_efulensis_TL386_c<br>ontig1_dhs_exon5-7              | Anisopus_efulensis_TL386_d<br>hs_exon1-7          | Anisopus_efulensis_TL386_d<br>hs_exon1-7         | IXXXN | J. J. Wheatley 65 (MO)  | ON793365 |
| Marsdenieae | <i>Anisopus efulensis</i><br>(N.E.Br.) Goyder            | Anisopus_efulensis_TL386_c<br>ontig2_dhs_exon5-7              | Anisopus_efulensis_TL386_d<br>hs_exon1-7          | Anisopus_efulensis_TL386_d<br>hs_exon1-7         | IXXXN | J. J. Wheatley 65 (MO)  | ON793366 |
| Marsdenieae | <i>Anisopus efulensis</i><br>(N.E.Br.) Goyder            | Anisopus_efulensis_TL386_c<br>ontig3_dhs_exon4                | Anisopus_efulensis_TL386_d<br>hs_exon1-7          | Anisopus_efulensis_TL386_d<br>hs_exon1-7         |       | J. J. Wheatley 65 (MO)  | ON793367 |



|             |                                                                  |                                                    |                                            |                                             |       |                                 |          |
|-------------|------------------------------------------------------------------|----------------------------------------------------|--------------------------------------------|---------------------------------------------|-------|---------------------------------|----------|
| Marsdenieae | <i>Anisopus efulensis</i> (N.E.Br.) Goyder                       | Anisopus_efulensis_TL386_c_ontig4_dhs_exon3        | Anisopus_efulensis_TL386_d_hs_exon1-7      | Anisopus_efulensis_TL386_d_hs_exon1-7       |       | J. J. Wheatley 65 (MO)          | ON793368 |
| Marsdenieae | <i>Anisopus efulensis</i> (N.E.Br.) Goyder                       | Anisopus_efulensis_TL386_c_ontig5_dhs_exon4        | Anisopus_efulensis_TL386_d_hs_exon1-7      | Anisopus_efulensis_TL386_d_hs_exon1-7       |       | J. J. Wheatley 65 (MO)          | ON793369 |
| Marsdenieae | <i>Anisopus efulensis</i> (N.E.Br.) Goyder                       | Anisopus_efulensis_TL386_c_ontig6_dhs_exon1-2      | Anisopus_efulensis_TL386_d_hs_exon1-7      | Anisopus_efulensis_TL386_d_hs_exon1-7       |       | J. J. Wheatley 65 (MO)          | ON793370 |
| Marsdenieae | <i>Anisopus efulensis</i> (N.E.Br.) Goyder                       | Anisopus_efulensis_TL386_c_ontig7_dhs_exon1-3      | Anisopus_efulensis_TL386_d_hs_exon1-7      | Anisopus_efulensis_TL386_d_hs_exon1-7       |       | J. J. Wheatley 65 (MO)          | ON793371 |
| Marsdenieae | <i>Campestigma purpurea</i> Pierre ex Costantin                  | Campestigma_purpureum_TL94_contig0_dhs_exon1-4     | Campestigma_purpureum_TL94_dhs_exon1-7     | Campestigma_purpureum_TL94_dhs_exon1-7      |       | D. J. Middleton et al. 221 (A)  | ON793372 |
| Marsdenieae | <i>Campestigma purpurea</i> Pierre ex Costantin                  | Campestigma_purpureum_TL94_contig1_hss_exon1-6     | Campestigma_purpureum_TL94_hss1_exon1-6    | Campestigma_purpureum_TL94_hss1_exon1-6     | IXXXD | D. J. Middleton et al. 221 (A)  | ON793373 |
| Marsdenieae | <i>Campestigma purpurea</i> Pierre ex Costantin                  | Campestigma_purpureum_TL94_contig2_hss_exon1-6     | Campestigma_purpureum_TL94_hss2_exon1-6    | Campestigma_purpureum_TL94_hss2_exon1-6     | IXXXN | D. J. Middleton et al. 221 (A)  | ON793374 |
| Marsdenieae | <i>Campestigma purpurea</i> Pierre ex Costantin                  | Campestigma_purpureum_TL94_contig3_dhs_exon5-7     | Campestigma_purpureum_TL94_dhs_exon1-7     | Campestigma_purpureum_TL94_dhs_exon1-7      | IXXXN | D. J. Middleton et al. 221 (A)  | ON793375 |
| Marsdenieae | <i>Dischidia albida</i> Griff.                                   | Dischidia_albida_PA67bB_c_ontig0_hss_exon1-6       | Dischidia_albida_PA67bB_hs_s_exon1-6       | Dischidia_albida_PA67bB_hs_s_exon1-6        | MXXXT | D. J. Middleton et al. 3050 (A) | ON793376 |
| Marsdenieae | <i>Dischidia albida</i> Griff.                                   | Dischidia_albida_PA67bB_c_ontig1_dhs_exon4         |                                            |                                             |       | D. J. Middleton et al. 3050 (A) | ON793377 |
| Marsdenieae | <i>Dischidia albida</i> Griff.                                   | Dischidia_albida_PA67bB_c_ontig2_dhs_exon5-7       |                                            |                                             | IXXXN | D. J. Middleton et al. 3050 (A) | ON793378 |
| Marsdenieae | <i>Dischidia albida</i> Griff.                                   | Dischidia_albida_PA67bB_c_ontig3_dhs_exon1-7       | Dischidia_albida_PA67bB_d_hs_exon1-7       | Dischidia_albida_PA67bB_d_hs_exon1-7        | IXXXN | D. J. Middleton et al. 3050 (A) | ON793379 |
| Marsdenieae | <i>Dischidia cleistantha</i> Livsh.                              | Dischidia_cleistantha_TLAsc401_contig0_dhs_exon1-4 | Dischidia_cleistantha_TLAsc401_dhs_exon1-7 | Dischidia_cleistantha_TLAsc401_dhs_exon1-7  |       | T. Livshultz TL98-6 (PH)        | ON793380 |
| Marsdenieae | <i>Dischidia cleistantha</i> Livsh.                              | Dischidia_cleistantha_TLAsc401_contig1_hss_exon1-7 | Dischidia_cleistantha_TLAsc401_hss_exon1-7 | Dischidia_cleistantha_TLAsc401_hss_exon1-7  | IXXXN | T. Livshultz TL98-6 (PH)        | ON793381 |
| Marsdenieae | <i>Dischidia cleistantha</i> Livsh.                              | Dischidia_cleistantha_TLAsc401_contig2_dhs_exon5-7 | Dischidia_cleistantha_TLAsc401_dhs_exon1-7 | Dischidia_cleistantha_TLAsc401_dhs_exon1-7  | IXXXN | T. Livshultz TL98-6 (PH)        | ON793382 |
| Marsdenieae | <i>Gongronemopsis angolensis</i> (N.E.Br.) S.Reuss, Liede & Meve | Gongronema_angolense_TL383_contig0_hss_exon1-6     | Gongronema_angolense_TL383_hss1_exon1-6    | Gongronemopsis_angolense_TL383_hss1_exon1-6 | IXXXN | R. E. Gereau et al. 5793 (MO)   | ON793383 |

|             |                                                                  |                                                  |                                           |                                              |       |                               |          |
|-------------|------------------------------------------------------------------|--------------------------------------------------|-------------------------------------------|----------------------------------------------|-------|-------------------------------|----------|
| Marsdenieae | <i>Gongronemopsis angolensis</i> (N.E.Br.) S.Reuss, Liede & Meve | Gongronema angolense_TL3_83_contig1_hss_exon1-6  | Gongronema angolense_TL3_83_hss2_exon1-6  | Gongronemopsis angolense_TL383_hss2_exon1-6  | IXXXN | R. E. Gereau et al. 5793 (MO) | ON793384 |
| Marsdenieae | <i>Gongronemopsis angolensis</i> (N.E.Br.) S.Reuss, Liede & Meve | Gongronema angolense_TL3_83_contig2_dhs_exon5-7  | Gongronema angolense_TL3_83_dhs_exon1-7   | Gongronemopsis angolense_TL383_dhs_exon1-7   | IXXXN | R. E. Gereau et al. 5793 (MO) | ON793385 |
| Marsdenieae | <i>Gongronemopsis angolensis</i> (N.E.Br.) S.Reuss, Liede & Meve | Gongronema angolense_TL3_83_contig3_dhs_exon5-7  | Gongronema angolense_TL3_83_dhs_exon1-7   | Gongronemopsis angolense_TL383_dhs_exon1-7   | IXXXN | R. E. Gereau et al. 5793 (MO) | ON793386 |
| Marsdenieae | <i>Gongronemopsis angolensis</i> (N.E.Br.) S.Reuss, Liede & Meve | Gongronema angolense_TL3_83_contig4_dhs_exon4    | Gongronema angolense_TL3_83_dhs_exon1-7   | Gongronemopsis angolense_TL383_dhs_exon1-7   |       | R. E. Gereau et al. 5793 (MO) | ON793387 |
| Marsdenieae | <i>Gongronemopsis angolensis</i> (N.E.Br.) S.Reuss, Liede & Meve | Gongronema angolense_TL3_83_contig5_dhs_exon2-3  | Gongronema angolense_TL3_83_dhs_exon1-7   | Gongronemopsis angolense_TL383_dhs_exon1-7   |       | R. E. Gereau et al. 5793 (MO) | ON793388 |
| Marsdenieae | <i>Gongronemopsis angolensis</i> (N.E.Br.) S.Reuss, Liede & Meve | Gongronema angolense_TL3_83_contig6_hss_exon2-6  | Gongronema angolense_TL3_83_hss3_exon2-6  | Gongronemopsis angolense_TL383_hss3_exon2-6  | IXXXD | R. E. Gereau et al. 5793 (MO) | ON793389 |
| Marsdenieae | <i>Gongronemopsis angolensis</i> (N.E.Br.) S.Reuss, Liede & Meve | Gongronema angolense_TL3_83_contig7_dhs_exon1-4  | Gongronema angolense_TL3_83_dhs_exon1-7   | Gongronemopsis angolense_TL383_dhs_exon1-7   |       | R. E. Gereau et al. 5793 (MO) | ON793390 |
| Marsdenieae | <i>Gongronemopsis angolensis</i> (N.E.Br.) S.Reuss, Liede & Meve | Gongronema angolense_TL3_83_contig8_hss_exon1-6  | Gongronema angolense_TL3_83_hss4_exon1-6  | Gongronemopsis angolense_TL383_hss4_exon1-6  | IXXXD | R. E. Gereau et al. 5793 (MO) | ON793391 |
| Marsdenieae | <i>Gongronemopsis angolensis</i> (N.E.Br.) S.Reuss, Liede & Meve | Gongronema angolense_TL3_83_contig9_hss_exon2-6  | Gongronema angolense_TL3_83_hss5_exon2-6  | Gongronemopsis angolense_TL383_hss5_exon2-6  | IXXXD | R. E. Gereau et al. 5793 (MO) | ON793392 |
| Marsdenieae | <i>Gongronemopsis latifolium</i> (Benth.) S.Reuss, Liede & Meve  | Gongronema latifolium_TL3_81_contig0_dhs_exon1-4 | Gongronema latifolium_TL3_81_dhs_exon1-7  | Gongronemopsis latifolium_TL381_dhs_exon1-7  |       | M. Merello et al. 1452 (MO)   | ON793393 |
| Marsdenieae | <i>Gongronemopsis latifolium</i> (Benth.) S.Reuss, Liede & Meve  | Gongronema latifolium_TL3_81_contig1_hss_exon1-7 | Gongronema latifolium_TL3_81_hss1_exon1-7 | Gongronemopsis latifolium_TL381_hss1_exon1-7 | IXXXD | M. Merello et al. 1452 (MO)   | ON793394 |
| Marsdenieae | <i>Gongronemopsis latifolium</i> (Benth.) S.Reuss, Liede & Meve  | Gongronema latifolium_TL3_81_contig2_dhs_exon5-7 | Gongronema latifolium_TL3_81_dhs_exon1-7  | Gongronemopsis latifolium_TL381_dhs_exon1-7  | IXXXN | M. Merello et al. 1452 (MO)   | ON793395 |
| Marsdenieae | <i>Gongronemopsis latifolium</i> (Benth.) S.Reuss, Liede & Meve  | Gongronema latifolium_TL3_81_contig3_hss_exon1-6 | Gongronema latifolium_TL3_81_hss2_exon1-6 | Gongronemopsis latifolium_TL381_hss2_exon1-6 | IXXXN | M. Merello et al. 1452 (MO)   | ON793396 |
| Marsdenieae | <i>Gongronema taylorii</i> (Schltr. & Rendle) Bullock            | Gongronema taylorii_TL377_contig0_dhs_exon1-4    | Gongronema taylorii_TL377_dhs_exon1-7     | Gongronema taylorii_TL377_dhs_exon1-7        |       | L. Festo et al. 2256 (MO)     | ON793397 |
| Marsdenieae | <i>Gongronema taylorii</i> (Schltr. & Rendle) Bullock            | Gongronema taylorii_TL377_contig1_hss_exon1-6    | Gongronema taylorii_TL377_hss_exon1-6     | Gongronema taylorii_TL377_hss_exon1-6        | IXXXN | L. Festo et al. 2256 (MO)     | ON793398 |
| Marsdenieae | <i>Gongronema taylorii</i> (Schltr. & Rendle) Bullock            | Gongronema taylorii_TL377_contig2_dhs_exon5-7    | Gongronema taylorii_TL377_dhs_exon1-7     | Gongronema taylorii_TL377_dhs_exon1-7        | IXXXN | L. Festo et al. 2256 (MO)     | ON793399 |

|             |                                               |                                                |                                         |                                       |       |                                 |          |
|-------------|-----------------------------------------------|------------------------------------------------|-----------------------------------------|---------------------------------------|-------|---------------------------------|----------|
| Marsdenieae | <i>Gymnema sylvestre</i> (Retz.) R.Br. ex Sm. | Gymnema_sylvestre_TL615_contig0_hss_exon1-6    | Gymnema_sylvestre_TL615_hss_exon1-6     | Gymnema_sylvestre_TL615_hss_exon1-6   | IXXXN | I. Friis et al. 7979 (BR)       | ON793400 |
| Marsdenieae | <i>Gymnema sylvestre</i> (Retz.) R.Br. ex Sm. | Gymnema_sylvestre_TL615_contig1_hss_exon1-6_ψ  | Gymnema_sylvestre_TL615_hss_exon1-6_ψ   |                                       | IXXXD | I. Friis et al. 7979 (BR)       | ON793401 |
| Marsdenieae | <i>Gymnema sylvestre</i> (Retz.) R.Br. ex Sm. | Gymnema_sylvestre_TL615_contig2_dhs_exon1-3    | Gymnema_sylvestre_TL615_dhs_exon1-7     | Gymnema_sylvestre_TL615_dhs_exon1-7   |       | I. Friis et al. 7979 (BR)       | ON793402 |
| Marsdenieae | <i>Gymnema sylvestre</i> (Retz.) R.Br. ex Sm. | Gymnema_sylvestre_TL615_contig3_dhs_exon5-7    | Gymnema_sylvestre_TL615_dhs_exon1-7     | Gymnema_sylvestre_TL615_dhs_exon1-7   | IXXXN | I. Friis et al. 7979 (BR)       | ON793403 |
| Marsdenieae | <i>Gymnema sylvestre</i> (Retz.) R.Br. ex Sm. | Gymnema_sylvestre_TL615_contig4_dhs_exon4      | Gymnema_sylvestre_TL615_dhs_exon1-7     | Gymnema_sylvestre_TL615_dhs_exon1-7   |       | I. Friis et al. 7979 (BR)       | ON793404 |
| Marsdenieae | <i>Hoya yuennanensis</i> Hand.-Mazz.          | Hoya_yuennanensis_TL238_contig0_dhs_exon1-4    | Hoya_yuennanensis_TL238_dhs_exon1-7     | Hoya_yuennanensis_TL238_dhs_exon1-7   |       | R. van Donkelaar IPPS4561 (L)   | ON793405 |
| Marsdenieae | <i>Hoya yuennanensis</i> Hand.-Mazz.          | Hoya_yuennanensis_TL238_contig1_hss_exon1-6    | Hoya_yuennanensis_TL238_hss_exon1-6     | Hoya_yuennanensis_TL238_hss_exon1-6   | IXXXN | R. van Donkelaar IPPS4561 (L)   | ON793406 |
| Marsdenieae | <i>Hoya yuennanensis</i> Hand.-Mazz.          | Hoya_yuennanensis_TL238_contig2_dhs_exon5-7    | Hoya_yuennanensis_TL238_dhs_exon1-7     | Hoya_yuennanensis_TL238_dhs_exon1-7   | IXXXN | R. van Donkelaar IPPS4561 (L)   | ON793407 |
| Marsdenieae | <i>Gymnema maingayi</i> Hook.f.               | Jasminanthes_maingayi_PA85_contig0_dhs_exon1-4 | Jasminanthes_maingayi_PA85_dhs_exon1-7  | Gymnema_maingayi_PA85_dhs_exon1-7     |       | Low et al. LYW523 (SING)        | ON793408 |
| Marsdenieae | <i>Gymnema maingayi</i> Hook.f.               | Jasminanthes_maingayi_PA85_contig1_hss_exon1-7 | Jasminanthes_maingayi_PA85_hss1_exon1-7 | Gymnema_maingayi_PA85_hss1_exon1-7    | IXXXD | Low et al. LYW523 (SING)        | ON793409 |
| Marsdenieae | <i>Gymnema maingayi</i> Hook.f.               | Jasminanthes_maingayi_PA85_contig2_dhs_exon5-7 | Jasminanthes_maingayi_PA85_dhs_exon1-7  | Gymnema_maingayi_PA85_dhs_exon1-7     | IXXXN | Low et al. LYW523 (SING)        | ON793410 |
| Marsdenieae | <i>Gymnema maingayi</i> Hook.f.               | Jasminanthes_maingayi_PA85_contig3_hss_exon1-6 | Jasminanthes_maingayi_PA85_hss2_exon1-6 | Gymnema_maingayi_PA85_hss2_exon1-6    | IXXXN | Low et al. LYW523 (SING)        | ON793411 |
| Marsdenieae | <i>Gymnema maingayi</i> Hook.f.               | Jasminanthes_maingayi_PA85_contig4_hss_exon1-6 | Jasminanthes_maingayi_PA85_hss3_exon1-6 | Gymnema_maingayi_PA85_hss3_exon1-6    | IXXXD | Low et al. LYW523 (SING)        | ON793412 |
| Marsdenieae | <i>Lygisma angustifolia</i> (Wight) Hook.f.   | Lygisma_angustifolia_TL98_contig0_hss_exon1-7  | Lygisma_angustifolia_TL98_hss_exon1-7   | Lygisma_angustifolia_TL98_hss_exon1-7 | IXXXN | D. J. Middleton et al. 1161 (A) | ON793413 |

|             |                                                              |                                                     |                                              |                                                 |       |                                 |          |
|-------------|--------------------------------------------------------------|-----------------------------------------------------|----------------------------------------------|-------------------------------------------------|-------|---------------------------------|----------|
| Marsdenieae | <i>Lygisma angustifolia</i> (Wight) Hook.f.                  | Lygisma_angustifolia_TL98_contig1_dhs_exon1-4       | Lygisma_angustifolia_TL98_dhs_exon1-7        | Lygisma_angustifolia_TL98_dhs_exon1-7           |       | D. J. Middleton et al. 1161 (A) | ON793414 |
| Marsdenieae | <i>Lygisma angustifolia</i> (Wight) Hook.f.                  | Lygisma_angustifolia_TL98_contig2_dhs_exon5-7       | Lygisma_angustifolia_TL98_dhs_exon1-7        | Lygisma_angustifolia_TL98_dhs_exon1-7           | IXXXN | D. J. Middleton et al. 1161 (A) | ON793415 |
| Marsdenieae | <i>Leichhardtia coronata</i> (Benth.) P.I.Forst.             | Marsdenia_coronata_TLAsc1_18_contig0_dhs_exon1-4    | Marsdenia_coronata_TLAsc1_18_dhs_exon1-7     | Leichhardtia_coronata_TLAsc1_18_dhs_exon1-7     |       | P. I. Forster 28695 (BRI)       | ON793416 |
| Marsdenieae | <i>Leichhardtia coronata</i> (Benth.) P.I.Forst.             | Marsdenia_coronata_TLAsc1_18_contig1_dhs_exon5-7    | Marsdenia_coronata_TLAsc1_18_dhs_exon1-7     | Leichhardtia_coronata_TLAsc1_18_dhs_exon1-7     | IXXXN | P. I. Forster 28695 (BRI)       | ON793417 |
| Marsdenieae | <i>Leichhardtia coronata</i> (Benth.) P.I.Forst.             | Marsdenia_coronata_TLAsc1_18_contig2_hss_exon1-6_↓  | Marsdenia_coronata_TLAsc1_18_hss_exon1-6_↓   |                                                 | IXXXD | P. I. Forster 28695 (BRI)       | ON793418 |
| Marsdenieae | <i>Leichhardtia coronata</i> (Benth.) P.I.Forst.             | Marsdenia_coronata_TLAsc1_18_contig3_hss_exon1-4    | Marsdenia_coronata_TLAsc1_18_hss_exon1-4     |                                                 |       | P. I. Forster 28695 (BRI)       | ON793419 |
| Marsdenieae | <i>Leichhardtia coronata</i> (Benth.) P.I.Forst.             | Marsdenia_coronata_TLAsc1_18_contig4_hss_exon1-7    | Marsdenia_coronata_TLAsc1_18_hss_exon1-7     | Leichhardtia_coronata_TLAsc1_18_hss_exon1-7     | IXXXN | P. I. Forster 28695 (BRI)       | ON793420 |
| Marsdenieae | <i>Leichhardtia flavescens</i> (A.Cunn. ex Hook.) P.I.Forst. | Marsdenia_flavescens_TLAsc1_126_contig0_dhs_exon1-4 | Marsdenia_flavescens_TLAsc1_126_dhs_exon1-7  | Leichhardtia_flavescens_TLAsc1_126_dhs_exon1-7  |       | P. I. Forster 28686 (BRI)       | ON793421 |
| Marsdenieae | <i>Leichhardtia flavescens</i> (A.Cunn. ex Hook.) P.I.Forst. | Marsdenia_flavescens_TLAsc1_126_contig1_hss_exon1-7 | Marsdenia_flavescens_TLAsc1_126_hss1_exon1-7 | Leichhardtia_flavescens_TLAsc1_126_hss1_exon1-7 | IXXXN | P. I. Forster 28686 (BRI)       | ON793422 |
| Marsdenieae | <i>Leichhardtia flavescens</i> (A.Cunn. ex Hook.) P.I.Forst. | Marsdenia_flavescens_TLAsc1_126_contig2_dhs_exon5-7 | Marsdenia_flavescens_TLAsc1_126_dhs_exon1-7  | Leichhardtia_flavescens_TLAsc1_126_dhs_exon1-7  | IXXXN | P. I. Forster 28686 (BRI)       | ON793423 |
| Marsdenieae | <i>Leichhardtia flavescens</i> (A.Cunn. ex Hook.) P.I.Forst. | Marsdenia_flavescens_TLAsc1_126_contig3_hss_exon3-6 | Marsdenia_flavescens_TLAsc1_126_hss_exon3-6  |                                                 | IXXXN | P. I. Forster 28686 (BRI)       | ON793424 |
| Marsdenieae | <i>Leichhardtia flavescens</i> (A.Cunn. ex Hook.) P.I.Forst. | Marsdenia_flavescens_TLAsc1_126_contig4_hss_exon2-6 | Marsdenia_flavescens_TLAsc1_126_hss2_exon2-6 | Leichhardtia_flavescens_TLAsc1_126_hss2_exon2-6 | IXXXD | P. I. Forster 28686 (BRI)       | ON793425 |
| Marsdenieae | <i>Marsdenia glabra</i> Costantin                            | Marsdenia_glabra                                    |                                              |                                                 | IXXXN | Livshultz et al. 2018           | MG817698 |
| Marsdenieae | <i>Marsdenia glabra</i> Costantin                            | Marsdenia_glabra_TL99_contig0_dhs_exon1-4           | Marsdenia_glabra_TL99_dhs_exon1-7            | Marsdenia_glabra_TL99_dhs_exon1-7               |       | D. J. Middleton et al. 1123 (A) | ON793426 |
| Marsdenieae | <i>Marsdenia glabra</i> Costantin                            | Marsdenia_glabra_TL99_contig1_hss_exon1-7           | Marsdenia_glabra_TL99_hss_exon1-7            | Marsdenia_glabra_TL99_hss_exon1-7               | IXXXN | D. J. Middleton et al. 1123 (A) | ON793427 |
| Marsdenieae | <i>Marsdenia glabra</i> Costantin                            | Marsdenia_glabra_TL99_contig2_dhs_exon5-7           | Marsdenia_glabra_TL99_dhs_exon1-7            | Marsdenia_glabra_TL99_dhs_exon1-7               | IXXXN | D. J. Middleton et al. 1123 (A) | ON793428 |

|             |                                                                           |                                                      |                                               |                                              |       |                                   |          |
|-------------|---------------------------------------------------------------------------|------------------------------------------------------|-----------------------------------------------|----------------------------------------------|-------|-----------------------------------|----------|
| Marsdenieae | <i>Gymnema longipedicellatum</i> (P.I.Forst.) P.I.Forst.                  | Marsdenia_longipedicellata_TL262_contig0_dhs_exon1-4 | Marsdenia_longipedicellata_TL262_dhs_exon1-7  | Gymnema_longipedicellatum_TL262_dhs_exon1-7  |       | P. I. Forster 26894 (BRI)         | ON793429 |
| Marsdenieae | <i>Gymnema longipedicellatum</i> (P.I.Forst.) P.I.Forst.                  | Marsdenia_longipedicellata_TL262_contig1_hss_exon1-7 | Marsdenia_longipedicellata_TL262_hss1_exon1-7 | Gymnema_longipedicellatum_TL262_hss1_exon1-7 | IXXXN | P. I. Forster 26894 (BRI)         | ON793430 |
| Marsdenieae | <i>Gymnema longipedicellatum</i> (P.I.Forst.) P.I.Forst.                  | Marsdenia_longipedicellata_TL262_contig2_dhs_exon5-7 | Marsdenia_longipedicellata_TL262_dhs_exon1-7  | Gymnema_longipedicellatum_TL262_dhs_exon1-7  | IXXXN | P. I. Forster 26894 (BRI)         | ON793431 |
| Marsdenieae | <i>Gymnema longipedicellatum</i> (P.I.Forst.) P.I.Forst.                  | Marsdenia_longipedicellata_TL262_contig3_dhs_exon6-7 | Marsdenia_longipedicellata_TL262_dhs_exon1-7  | Gymnema_longipedicellatum_TL262_dhs_exon1-7  |       | P. I. Forster 26894 (BRI)         | ON793432 |
| Marsdenieae | <i>Gymnema longipedicellatum</i> (P.I.Forst.) P.I.Forst.                  | Marsdenia_longipedicellata_TL262_contig4_hss_exon1-6 | Marsdenia_longipedicellata_TL262_hss2_exon1-6 | Gymnema_longipedicellatum_TL262_hss2_exon1-6 | IXXXD | P. I. Forster 26894 (BRI)         | ON793433 |
| Marsdenieae | <i>Marsdenia tinctoria</i> R.Br.                                          | Marsdenia_tinctoria_TL376_contig0_hss_exon1-7        | Marsdenia_tinctoria_TL376_hss_exon1-7         | Marsdenia_tinctoria_TL376_hss_exon1-7        | IXXXD | Li Heng et al. 24896 (MO)         | ON793434 |
| Marsdenieae | <i>Marsdenia tinctoria</i> R.Br.                                          | Marsdenia_tinctoria_TL376_contig1_dhs_exon1-4        | Marsdenia_tinctoria_TL376_dhs_exon1-7         | Marsdenia_tinctoria_TL376_dhs_exon1-7        |       | Li Heng et al. 24896 (MO)         | ON793435 |
| Marsdenieae | <i>Marsdenia tinctoria</i> R.Br.                                          | Marsdenia_tinctoria_TL376_contig2_hss_exon1-5        | Marsdenia_tinctoria_TL376_hss_exon1-5         |                                              |       | Li Heng et al. 24896 (MO)         | ON793436 |
| Marsdenieae | <i>Marsdenia tinctoria</i> R.Br.                                          | Marsdenia_tinctoria_TL376_contig3_dhs_exon5-7        | Marsdenia_tinctoria_TL376_dhs_exon1-7         | Marsdenia_tinctoria_TL376_dhs_exon1-7        | IXXXN | Li Heng et al. 24896 (MO)         | ON793437 |
| Marsdenieae | <i>Gongronemopsis truncata</i> (Jum. & H. Perrier) S. Reuss, Liede & Meve | Marsdenia_truncata_TL397_c_ontig0_dhs_exon1-4        | Marsdenia_truncata_TL397_dhs_exon1-7          | Gongronemopsis_truncata_TL397_dhs_exon1-7    |       | J. N. Labat & T. Devoin 2321 (MO) | ON793438 |
| Marsdenieae | <i>Gongronemopsis truncata</i> (Jum. & H. Perrier) S. Reuss, Liede & Meve | Marsdenia_truncata_TL397_c_ontig1_hss_exon1-7        | Marsdenia_truncata_TL397_hss1_exon1-7         | Gongronemopsis_truncata_TL397_hss1_exon1-7   | IXXXN | J. N. Labat & T. Devoin 2321 (MO) | ON793439 |
| Marsdenieae | <i>Gongronemopsis truncata</i> (Jum. & H. Perrier) S. Reuss, Liede & Meve | Marsdenia_truncata_TL397_c_ontig2_hss_exon1-7_ψ      | Marsdenia_truncata_TL397_hss_exon1-7_ψ        |                                              | IXXXD | J. N. Labat & T. Devoin 2321 (MO) | ON793440 |
| Marsdenieae | <i>Gongronemopsis truncata</i> (Jum. & H. Perrier) S. Reuss, Liede & Meve | Marsdenia_truncata_TL397_c_ontig3_dhs_exon5-7        | Marsdenia_truncata_TL397_dhs_exon1-7          | Gongronemopsis_truncata_TL397_dhs_exon1-7    | IXXXN | J. N. Labat & T. Devoin 2321 (MO) | ON793441 |

|             |                                                                           |                                                      |                                              |                                            |       |                                   |          |
|-------------|---------------------------------------------------------------------------|------------------------------------------------------|----------------------------------------------|--------------------------------------------|-------|-----------------------------------|----------|
| Marsdenieae | <i>Gongronemopsis truncata</i> (Jum. & H. Perrier) S. Reuss, Liede & Meve | Marsdenia_truncata_TL397_c ontig4_hss_exon1-6        | Marsdenia_truncata_TL397_hss2_exon1-6        | Gongronemopsis_truncata_TL397_hss2_exon1-6 | IXXXN | J. N. Labat & T. Devoin 2321 (MO) | ON793442 |
| Marsdenieae | <i>RueHSSia caatingae</i> (Morillo) F.Esp.Santo & Rapini                  | Ruehssia_caatingae_PA111_c ontig0_dhs_exon1-4        | Ruehssia_caatingae_PA111_dhs_exon1-7         | Ruehssia_caatingae_PA111_dhs_exon1-7       |       | C. Bitencourt 418 (HUEFS)         | ON793443 |
| Marsdenieae | <i>RueHSSia caatingae</i> (Morillo) F.Esp.Santo & Rapini                  | Ruehssia_caatingae_PA111_c ontig1_hss_exon1-6        | Ruehssia_caatingae_PA111_hss1_exon1-6        | Ruehssia_caatingae_PA111_hss1_exon1-6      | IXXXD | C. Bitencourt 418 (HUEFS)         | ON793444 |
| Marsdenieae | <i>RueHSSia caatingae</i> (Morillo) F.Esp.Santo & Rapini                  | Ruehssia_caatingae_PA111_c ontig2_hss_exon1-6        | Ruehssia_caatingae_PA111_hss2_exon1-6        | Ruehssia_caatingae_PA111_hss2_exon1-6      | IXXXN | C. Bitencourt 418 (HUEFS)         | ON793445 |
| Marsdenieae | <i>RueHSSia caatingae</i> (Morillo) F.Esp.Santo & Rapini                  | Ruehssia_caatingae_PA111_c ontig3_dhs_exon5-7        | Ruehssia_caatingae_PA111_dhs_exon1-7         | Ruehssia_caatingae_PA111_dhs_exon1-7       | IXXXN | C. Bitencourt 418 (HUEFS)         | ON793446 |
| Marsdenieae | <i>RueHSSia guaranitica</i> (Malme) Liede & H.A.Keller                    | Ruehssia_guaranitica_TLAsc 227_contig0_dhs_exon1-4   | Ruehssia_guaranitica_TLAsc 227_dhs_exon1-7   | Ruehssia_guaranitica_TLAsc 227_dhs_exon1-7 |       | Zardini 46813 (MO)                | ON793447 |
| Marsdenieae | <i>RueHSSia guaranitica</i> (Malme) Liede & H.A.Keller                    | Ruehssia_guaranitica_TLAsc 227_contig1_dhs_exon5-7   | Ruehssia_guaranitica_TLAsc 227_dhs_exon1-7   | Ruehssia_guaranitica_TLAsc 227_dhs_exon1-7 | IXXXN | Zardini 46813 (MO)                | ON793448 |
| Marsdenieae | <i>RueHSSia guaranitica</i> (Malme) Liede & H.A.Keller                    | Ruehssia_guaranitica_TLAsc 227_contig2_hss_exon1     | Ruehssia_guaranitica_TLAsc 227_hss_exon1     |                                            |       | Zardini 46813 (MO)                | ON793449 |
| Marsdenieae | <i>RueHSSia guaranitica</i> (Malme) Liede & H.A.Keller                    | Ruehssia_guaranitica_TLAsc 227_contig3_hss_exon1-7   | Ruehssia_guaranitica_TLAsc 227_hss_exon1-7   | Ruehssia_guaranitica_TLAsc 227_hss_exon1-7 | IXXXN | Zardini 46813 (MO)                | ON793450 |
| Marsdenieae | <i>RueHSSia guaranitica</i> (Malme) Liede & H.A.Keller                    | Ruehssia_guaranitica_TLAsc 227_contig4_hss_exon1-6_∪ | Ruehssia_guaranitica_TLAsc 227_hss_exon1-6_∪ |                                            | IXXXD | Zardini 46813 (MO)                | ON793451 |
| Marsdenieae | <i>RueHSSia laxiflora</i> (Donn.Sm.) Gonz.-Martínez & Lozada-Pérez        | Ruehssia_laxiflora_TLAsc22 5_contig0_dhs_exon1-4     | Ruehssia_laxiflora_TLAsc22 5_dhs_exon1-7     | Ruehssia_laxiflora_TLAsc22 5_dhs_exon1-7   |       | Martinez 23675 (MO)               | ON793452 |
| Marsdenieae | <i>RueHSSia laxiflora</i> (Donn.Sm.) Gonz.-Martínez & Lozada-Pérez        | Ruehssia_laxiflora_TLAsc22 5_contig1_hss_exon1-6     | Ruehssia_laxiflora_TLAsc22 5_hss_exon1-6     | Ruehssia_laxiflora_TLAsc22 5_hss_exon1-6   | IXXXN | Martinez 23675 (MO)               | ON793453 |
| Marsdenieae | <i>RueHSSia laxiflora</i> (Donn.Sm.) Gonz.-Martínez & Lozada-Pérez        | Ruehssia_laxiflora_TLAsc22 5_contig2_dhs_exon5-7     | Ruehssia_laxiflora_TLAsc22 5_dhs_exon1-7     | Ruehssia_laxiflora_TLAsc22 5_dhs_exon1-7   | IXXXN | Martinez 23675 (MO)               | ON793454 |
| Marsdenieae | <i>RueHSSia laxiflora</i> (Donn.Sm.) Gonz.-Martínez & Lozada-Pérez        | Ruehssia_laxiflora_TLAsc22 5_contig3_hss_exon3-6     | Ruehssia_laxiflora_TLAsc22 5_hss_exon3-6     |                                            | IXXXD | Martinez 23675 (MO)               | ON793455 |
| Marsdenieae | <i>RueHSSia macrophylla</i> (Humb. & Bonpl. ex Schult.) H.Karst.          | Ruehssia_macrophylla_TL22 6_contig0_dhs_exon1-4      | Ruehssia_macrophylla_TL22 6_dhs_exon1-7      | Ruehssia_macrophylla_TL22 6_dhs_exon1-7    |       | Stevens 26072 (MO)                | ON793456 |

|             |                                                                        |                                                               |                                                    |                                                    |       |                                     |          |
|-------------|------------------------------------------------------------------------|---------------------------------------------------------------|----------------------------------------------------|----------------------------------------------------|-------|-------------------------------------|----------|
| Marsdenieae | <i>RueHSSia macrophylla</i><br>(Humb. & Bonpl. ex<br>Schult.) H.Karst. | Ruehssia_macrophylla_TL22<br>6_contig1_hss_exon1-6            | Ruehssia_macrophylla_TL22<br>6_hss1_exon1-6        | Ruehssia_macrophylla_TL22<br>6_hss1_exon1-6        | IXXXD | Stevens 26072 (MO)                  | ON793457 |
| Marsdenieae | <i>RueHSSia macrophylla</i><br>(Humb. & Bonpl. ex<br>Schult.) H.Karst. | Ruehssia_macrophylla_TL22<br>6_contig2_dhs_exon5-7            | Ruehssia_macrophylla_TL22<br>6_dhs_exon1-7         | Ruehssia_macrophylla_TL22<br>6_dhs_exon1-7         | IXXXN | Stevens 26072 (MO)                  | ON793458 |
| Marsdenieae | <i>RueHSSia macrophylla</i><br>(Humb. & Bonpl. ex<br>Schult.) H.Karst. | Ruehssia_macrophylla_TL22<br>6_contig3_hss_exon1-7            | Ruehssia_macrophylla_TL22<br>6_hss2_exon1-7        | Ruehssia_macrophylla_TL22<br>6_hss2_exon1-7        | IXXXN | Stevens 26072 (MO)                  | ON793459 |
| Marsdenieae | <i>Sarcolobus cambogensis</i><br>McHone & Livsh.                       | Sarcolobus_cambogensis_TL<br>628_contig0_hss_exon1-7          | Sarcolobus_cambogensis_TL<br>628_hss1_exon1-7      | Sarcolobus_cambogensis_TL<br>628_hss1_exon1-7      | IXXXD | C. Long et al. CL546 (P)            | ON793460 |
| Marsdenieae | <i>Sarcolobus cambogensis</i><br>McHone & Livsh.                       | Sarcolobus_cambogensis_TL<br>628_contig1_hss_exon1-6          | Sarcolobus_cambogensis_TL<br>628_hss2_exon1-6      | Sarcolobus_cambogensis_TL<br>628_hss2_exon1-6      | IXXXN | C. Long et al. CL546 (P)            | ON793461 |
| Marsdenieae | <i>Sarcolobus cambogensis</i><br>McHone & Livsh.                       | Sarcolobus_cambogensis_TL<br>628_contig2_dhs_exon1-3          | Sarcolobus_cambogensis_TL<br>628_dhs_exon1-7       | Sarcolobus_cambogensis_TL<br>628_dhs_exon1-7       |       | C. Long et al. CL546 (P)            | ON793462 |
| Marsdenieae | <i>Sarcolobus cambogensis</i><br>McHone & Livsh.                       | Sarcolobus_cambogensis_TL<br>628_contig3_dhs_exon5-7          | Sarcolobus_cambogensis_TL<br>628_dhs_exon1-7       | Sarcolobus_cambogensis_TL<br>628_dhs_exon1-7       | IXXXN | C. Long et al. CL546 (P)            | ON793463 |
| Marsdenieae | <i>Stigmatorhynchus<br/>umbellifer</i> (K.Schum.)<br>Schltr.           | Stigmatorhynchus_umbellifer<br>_TL394_contig0_hss_exon1-<br>6 | Stigmatorhynchus_umbellifer<br>_TL394_hss1_exon1-6 | Stigmatorhynchus_umbellifer<br>_TL394_hss1_exon1-6 | IXXXN | R. K. Brummitt et al.<br>18074 (MO) | ON793464 |
| Marsdenieae | <i>Stigmatorhynchus<br/>umbellifer</i> (K.Schum.)<br>Schltr.           | Stigmatorhynchus_umbellifer<br>_TL394_contig1_hss_exon1-<br>6 | Stigmatorhynchus_umbellifer<br>_TL394_hss2_exon1-6 | Stigmatorhynchus_umbellifer<br>_TL394_hss2_exon1-6 | IXXXD | R. K. Brummitt et al.<br>18074 (MO) | ON793465 |
| Marsdenieae | <i>Stigmatorhynchus<br/>umbellifer</i> (K.Schum.)<br>Schltr.           | Stigmatorhynchus_umbellifer<br>_TL394_contig2_dhs_exon1-<br>3 | Stigmatorhynchus_umbellifer<br>_TL394_dhs_exon1-7  | Stigmatorhynchus_umbellifer<br>_TL394_dhs_exon1-7  |       | R. K. Brummitt et al.<br>18074 (MO) | ON793466 |
| Marsdenieae | <i>Stigmatorhynchus<br/>umbellifer</i> (K.Schum.)<br>Schltr.           | Stigmatorhynchus_umbellifer<br>_TL394_contig3_dhs_exon5-<br>7 | Stigmatorhynchus_umbellifer<br>_TL394_dhs_exon1-7  | Stigmatorhynchus_umbellifer<br>_TL394_dhs_exon1-7  | IXXXN | R. K. Brummitt et al.<br>18074 (MO) | ON793467 |
| Marsdenieae | <i>Stigmatorhynchus<br/>umbellifer</i> (K.Schum.)<br>Schltr.           | Stigmatorhynchus_umbellifer<br>_TL394_contig4_dhs_exon4       | Stigmatorhynchus_umbellifer<br>_TL394_dhs_exon1-7  | Stigmatorhynchus_umbellifer<br>_TL394_dhs_exon1-7  |       | R. K. Brummitt et al.<br>18074 (MO) | ON793468 |
| Melodineae  | <i>Craspidospermum<br/>verticillatum</i> Bojer ex<br>Decne.            | Craspidospermum_verticillat<br>um_58_contig0_dhs_exon5-7      | Craspidospermum_verticillat<br>um_58_dhs_exon1-7   | Craspidospermum_verticillat<br>um_58_dhs_exon1-7   | IXXXN | L. A. Nilsson et al. D36<br>(UPS)   | ON793469 |

|            |                                                       |                                                      |                                              |                                              |       |                                  |          |
|------------|-------------------------------------------------------|------------------------------------------------------|----------------------------------------------|----------------------------------------------|-------|----------------------------------|----------|
| Melodineae | <i>Craspidospermum verticillatum</i> Bojer ex Decne.  | Craspidospermum_verticillatum_58_contig1_dhs_exon1-4 | Craspidospermum_verticillatum_58_dhs_exon1-7 | Craspidospermum_verticillatum_58_dhs_exon1-7 |       | L. A. Nilsson et al. D36 (UPS)   | ON793470 |
| Melodineae | <i>Diplorhynchus condylocarpon</i> (Müll.Arg.) Pichon | Diplorhynchus_condylocarpon_70_contig0_dhs_exon1-4   | Diplorhynchus_condylocarpon_70_dhs_exon1-7   | Diplorhynchus_condylocarpon_70_dhs_exon1-7   |       | E. Schmidt s.n. (UPS)            | ON793471 |
| Melodineae | <i>Diplorhynchus condylocarpon</i> (Müll.Arg.) Pichon | Diplorhynchus_condylocarpon_70_contig1_dhs_exon5-7   | Diplorhynchus_condylocarpon_70_dhs_exon1-7   | Diplorhynchus_condylocarpon_70_dhs_exon1-7   | IXXXN | E. Schmidt s.n. (UPS)            | ON793472 |
| Melodineae | <i>Diplorhynchus condylocarpon</i> (Müll.Arg.) Pichon | Diplorhynchus_condylocarpon_70_contig2_dhs_exon6_Ψ1  | Diplorhynchus_condylocarpon_70_dhs_exon6_Ψ1  |                                              | LXXXH | E. Schmidt s.n. (UPS)            | ON793473 |
| Melodineae | <i>Diplorhynchus condylocarpon</i> (Müll.Arg.) Pichon | Diplorhynchus_condylocarpon_70_contig3_dhs_exon6_Ψ2  | Diplorhynchus_condylocarpon_70_dhs_exon6_Ψ2  |                                              | IXXXN | E. Schmidt s.n. (UPS)            | ON793474 |
| Melodineae | <i>Diplorhynchus condylocarpon</i> (Müll.Arg.) Pichon | Diplorhynchus_condylocarpon_70_contig4_dhs_exon6_Ψ3  | Diplorhynchus_condylocarpon_70_dhs_exon6_Ψ3  |                                              | IXXXN | E. Schmidt s.n. (UPS)            | ON793475 |
| Melodineae | <i>Diplorhynchus condylocarpon</i> (Müll.Arg.) Pichon | Diplorhynchus_condylocarpon_70_contig5_dhs_exon6_Ψ4  | Diplorhynchus_condylocarpon_70_dhs_exon6_Ψ4  |                                              | IXXXN | E. Schmidt s.n. (UPS)            | ON793476 |
| Melodineae | <i>Diplorhynchus condylocarpon</i> (Müll.Arg.) Pichon | Diplorhynchus_condylocarpon_70_contig6_dhs_exon6_Ψ5  | Diplorhynchus_condylocarpon_70_dhs_exon6_Ψ5  |                                              | IXXXN | E. Schmidt s.n. (UPS)            | ON793477 |
| Melodineae | <i>Diplorhynchus condylocarpon</i> (Müll.Arg.) Pichon | Diplorhynchus_condylocarpon_70_contig7_dhs_exon6_Ψ6  | Diplorhynchus_condylocarpon_70_dhs_exon6_Ψ6  |                                              | IXXXN | E. Schmidt s.n. (UPS)            | ON793478 |
| Melodineae | <i>Diplorhynchus condylocarpon</i> (Müll.Arg.) Pichon | Diplorhynchus_condylocarpon_70_contig8_dhs_exon6     | Diplorhynchus_condylocarpon_70_dhs_exon6     |                                              | IXXXN | E. Schmidt s.n. (UPS)            | ON793479 |
| Melodineae | <i>Diplorhynchus condylocarpon</i> (Müll.Arg.) Pichon | Diplorhynchus_condylocarpon_70_contig9_dhs_exon6_Ψ7  | Diplorhynchus_condylocarpon_70_dhs_exon6_Ψ7  |                                              | IXXXN | E. Schmidt s.n. (UPS)            | ON793480 |
| Melodineae | <i>Melodinus cambodiensis</i> Pierre                  | Melodinus_cambodiensis                               | Melodinus_cambodiensis                       |                                              | IXXXN | Livshultz et al. 2018            | MG817710 |
| Melodineae | <i>Pycnobotrya nitida</i> Benth.                      | Pycnobotrya_nitida_59_contig0_dhs_exon5-7            | Pycnobotrya_nitida_59_dhs_exon1-7            | Pycnobotrya_nitida_59_dhs_exon1-7            | IXXXN | F. J. Breteler et al. 14782 (PH) | ON793481 |
| Melodineae | <i>Pycnobotrya nitida</i> Benth.                      | Pycnobotrya_nitida_59_contig1_dhs_exon2-3            | Pycnobotrya_nitida_59_dhs_exon1-7            | Pycnobotrya_nitida_59_dhs_exon1-7            |       | F. J. Breteler et al. 14782 (PH) | ON793482 |
| Melodineae | <i>Pycnobotrya nitida</i> Benth.                      | Pycnobotrya_nitida_59_contig2_dhs_exon4              | Pycnobotrya_nitida_59_dhs_exon1-7            | Pycnobotrya_nitida_59_dhs_exon1-7            |       | F. J. Breteler et al. 14782 (PH) | ON793483 |
| Melodineae | <i>Pycnobotrya nitida</i> Benth.                      | Pycnobotrya_nitida_59_contig3_dhs_exon1              | Pycnobotrya_nitida_59_dhs_exon1-7            | Pycnobotrya_nitida_59_dhs_exon1-7            |       | F. J. Breteler et al. 14782 (PH) | ON793484 |



|             |                                                       |                                                        |                                                 |                                                |       |                                  |          |
|-------------|-------------------------------------------------------|--------------------------------------------------------|-------------------------------------------------|------------------------------------------------|-------|----------------------------------|----------|
| Mesechiteae | <i>Allomarkgrafia brenesiana</i><br>Woodson           | Allomarkgrafia_brenesiana_P<br>A98_contig0_hss_exon1-7 | Allomarkgrafia_brenesiana_P<br>A98_hss_exon1-7  | Allomarkgrafia_brenesiana_P<br>A98_hss_exon1-7 | VXXXD | J. F. Morales s.n. (INB)         | ON793485 |
| Mesechiteae | <i>Allomarkgrafia brenesiana</i><br>Woodson           | Allomarkgrafia_brenesiana_P<br>A98_contig1_dhs_exon1-4 | Allomarkgrafia_brenesiana_P<br>A98_dhs_exon1-7  | Allomarkgrafia_brenesiana_P<br>A98_dhs_exon1-7 |       | J. F. Morales s.n. (INB)         | ON793486 |
| Mesechiteae | <i>Allomarkgrafia brenesiana</i><br>Woodson           | Allomarkgrafia_brenesiana_P<br>A98_contig2_dhs_exon5-7 | Allomarkgrafia_brenesiana_P<br>A98_dhs_exon1-7  | Allomarkgrafia_brenesiana_P<br>A98_dhs_exon1-7 | IXXXN | J. F. Morales s.n. (INB)         | ON793487 |
| Mesechiteae | <i>Forsteronia guyanensis</i><br>Müll.Arg.            | Forsteronia_guyanensis                                 |                                                 |                                                | VXXXD | Livshultz et al. 2018            | MG817682 |
| Mesechiteae | <i>Forsteronia guyanensis</i><br>Müll.Arg.            | Forsteronia_guyanensis_TLA<br>39_contig0_hss_exon1-7   | Forsteronia_guyanensis_TLA<br>39_hss_exon1-7    | Forsteronia_guyanensis_TLA<br>39_hss_exon1-7   | VXXXD | Prévost & Feuillet 3970<br>(CAY) | ON793488 |
| Mesechiteae | <i>Forsteronia guyanensis</i><br>Müll.Arg.            | Forsteronia_guyanensis_TLA<br>39_contig1_hss_exon6-7_Ψ | Forsteronia_guyanensis_TLA<br>39_hss_exon6-7_Ψ1 |                                                | VXXXD | Prévost & Feuillet 3970<br>(CAY) | ON793489 |
| Mesechiteae | <i>Forsteronia guyanensis</i><br>Müll.Arg.            | Forsteronia_guyanensis_TLA<br>39_contig2_hss_exon6_Ψ   | Forsteronia_guyanensis_TLA<br>39_hss_exon6_Ψ2   |                                                |       | Prévost & Feuillet 3970<br>(CAY) | ON793490 |
| Mesechiteae | <i>Forsteronia guyanensis</i><br>Müll.Arg.            | Forsteronia_guyanensis_TLA<br>39_contig3_hss_exon6_Ψ   | Forsteronia_guyanensis_TLA<br>39_hss_exon6_Ψ3   |                                                |       | Prévost & Feuillet 3970<br>(CAY) | ON793491 |
| Mesechiteae | <i>Forsteronia guyanensis</i><br>Müll.Arg.            | Forsteronia_guyanensis_TLA<br>39_contig4_dhs_exon1-6   | Forsteronia_guyanensis_TLA<br>39_dhs_exon1-6    | Forsteronia_guyanensis_TLA<br>39_dhs_exon1-6   | IXXXN | Prévost & Feuillet 3970<br>(CAY) | ON793492 |
| Mesechiteae | <i>Mandevilla boliviensis</i><br>(J.J.Veitch) Woodson | Mandevilla_boliviensis                                 |                                                 |                                                | VXXXD | Livshultz et al. 2018            | MG817694 |
| Mesechiteae | <i>Mandevilla boliviensis</i><br>(J.J.Veitch) Woodson | Mandevilla_boliviensis_TLA<br>76_contig0_hss_exon1-7   | Mandevilla_boliviensis_TLA<br>76_hss_exon1-7    | Mandevilla_boliviensis_TLA<br>76_hss_exon1-7   | VXXXD | T. Livshultz 03-35 (GH)          | ON793493 |
| Mesechiteae | <i>Mandevilla boliviensis</i><br>(J.J.Veitch) Woodson | Mandevilla_boliviensis_TLA<br>76_contig1_dhs_exon1-4   | Mandevilla_boliviensis_TLA<br>76_dhs_exon1-7    | Mandevilla_boliviensis_TLA<br>76_dhs_exon1-7   |       | T. Livshultz 03-35 (GH)          | ON793494 |
| Mesechiteae | <i>Mandevilla boliviensis</i><br>(J.J.Veitch) Woodson | Mandevilla_boliviensis_TLA<br>76_contig2_dhs_exon5-7   | Mandevilla_boliviensis_TLA<br>76_dhs_exon1-7    | Mandevilla_boliviensis_TLA<br>76_dhs_exon1-7   | IXXXN | T. Livshultz 03-35 (GH)          | ON793495 |
| Mesechiteae | <i>Mandevilla longiflora</i><br>(Desf.) Pichon        | Mandevilla_longiflora                                  | Mandevilla_longiflora                           | Mandevilla_longiflora                          | VXXXD | Livshultz et al. 2018            | MG817672 |

|             |                                                 |                                             |                                     |                                    |       |                                |          |
|-------------|-------------------------------------------------|---------------------------------------------|-------------------------------------|------------------------------------|-------|--------------------------------|----------|
| Mesechiteae | <i>Mesechites trifidus</i> (Jacq.) Müll.Arg.    | Mesechites_trifidus                         |                                     |                                    | VXXXD | Livshultz et al. 2018          | MG817684 |
| Mesechiteae | <i>Mesechites trifidus</i> (Jacq.) Müll.Arg.    | Mesechites_trifidus_45_conti_g0_hss_exon1-7 | Mesechites_trifidus_45_hss_exon1-7  | Mesechites_trifidus_45_hss_exon1-7 | VXXXD | S. Liede & U. Meve 3471 (UBT)  | ON793496 |
| Mesechiteae | <i>Mesechites trifidus</i> (Jacq.) Müll.Arg.    | Mesechites_trifidus_45_conti_g1_dhs_exon5-7 | Mesechites_trifidus_45_dhs_exon1-7  | Mesechites_trifidus_45_dhs_exon1-7 | IXXXN | S. Liede & U. Meve 3471 (UBT)  | ON793497 |
| Mesechiteae | <i>Mesechites trifidus</i> (Jacq.) Müll.Arg.    | Mesechites_trifidus_45_conti_g2_dhs_exon1-4 | Mesechites_trifidus_45_dhs_exon1-7  | Mesechites_trifidus_45_dhs_exon1-7 |       | S. Liede & U. Meve 3471 (UBT)  | ON793498 |
| Nerieae     | <i>Adenium obesum</i> (Forssk.) Roem. & Schult. | Adenium_obesum                              | Adenium_obesum                      | Adenium_obesum                     | IXXXN | Livshultz et al. 2018          | MG817693 |
| Nerieae     | <i>Alafia barteri</i> Oliv.                     | Alafia_barteri_1                            |                                     |                                    | IXXXD | Livshultz et al. 2018          | MG817679 |
| Nerieae     | <i>Alafia barteri</i> Oliv.                     | Alafia_barteri_2                            |                                     |                                    | IXXXN | Livshultz et al. 2018          | MG817678 |
| Nerieae     | <i>Alafia barteri</i> Oliv.                     | Alafia_barteri_52_contig0_hss_exon3-7       | Alafia_barteri_52_hss_exon1-7       | Alafia_barteri_52_hss_exon1-7      | IXXXD | H. H. Schmidt et al. 2037 (MO) | ON793499 |
| Nerieae     | <i>Alafia barteri</i> Oliv.                     | Alafia_barteri_52_contig1_hss_exon1-2       | Alafia_barteri_52_hss_exon1-7       | Alafia_barteri_52_hss_exon1-7      |       | H. H. Schmidt et al. 2037 (MO) | ON793500 |
| Nerieae     | <i>Alafia barteri</i> Oliv.                     | Alafia_barteri_52_contig2_dhs_exon1-7       | Alafia_barteri_52_dhs_exon1-7       | Alafia_barteri_52_dhs_exon1-7      | IXXXN | H. H. Schmidt et al. 2037 (MO) | ON793501 |
| Nerieae     | <i>Alafia thoursii</i> Roem. & Schult.          | Alafia_thoursii_TL216_contig0_dhs_exon1-7   | Alafia_thoursii_TL216_dhs_exon1-7   | Alafia_thoursii_TL216_dhs_exon1-7  | IXXXN | G. McPherson et al. 17584 (MO) | ON793502 |
| Nerieae     | <i>Alafia thoursii</i> Roem. & Schult.          | Alafia_thoursii_TL216_contig1_hss_exon1     | Alafia_thoursii_TL216_hss_exon1-7   | Alafia_thoursii_TL216_hss_exon1-7  |       | G. McPherson et al. 17584 (MO) | ON793503 |
| Nerieae     | <i>Alafia thoursii</i> Roem. & Schult.          | Alafia_thoursii_TL216_contig2_hss_exon5-6_ψ | Alafia_thoursii_TL216_hss_exon5-6_ψ |                                    | IXXXD | G. McPherson et al. 17584 (MO) | ON793504 |

|         |                                             |                                                    |                                            |                                           |        |                                 |          |
|---------|---------------------------------------------|----------------------------------------------------|--------------------------------------------|-------------------------------------------|--------|---------------------------------|----------|
| Nerieae | <i>Alafia thouarsii</i> Roem. & Schult.     | Alafia_thouarsii_TL216_contig3_hss_exon2-7         | Alafia_thouarsii_TL216_hss_exon1-7         | Alafia_thouarsii_TL216_hss_exon1-7        | IXXXD  | G. McPherson et al. 17584 (MO)  | ON793505 |
| Nerieae | <i>Isonema smeathmannii</i> Roem. & Schult. | Isonema_smeathmannii                               |                                            |                                           | VXXX   | Livshultz et al. 2018           | MG817669 |
| Nerieae | <i>Isonema smeathmannii</i> Roem. & Schult. | Isonema_smeathmannii_TLA142_contig0_hss_exon1-6    | Isonema_smeathmannii_TLA142_hss_exon1-6    | Isonema_smeathmannii_TLA142_hss_exon1-6   | VXXXD  | F. Billiet S1964 (BR)           | ON793506 |
| Nerieae | <i>Isonema smeathmannii</i> Roem. & Schult. | Isonema_smeathmannii_TLA142_contig1_dhs_exon1-7    | Isonema_smeathmannii_TLA142_dhs_exon1-7    | Isonema_smeathmannii_TLA142_dhs_exon1-7   | IXXXN  | F. Billiet S1964 (BR)           | ON793507 |
| Nerieae | <i>Nerium oleander</i> L.                   | Nerium_oleander_TLA109_contig0_dhs_exon1-7         | Nerium_oleander_TLA109_dhs_exon1-7         | Nerium_oleander_TLA109_dhs_exon1-7        | IXXXN  | G. Ionta 416 (FLAS)             | ON793508 |
| Nerieae | <i>Nerium oleander</i> L.                   | Nerium_oleander_TLA109_contig1_hss_exon4-7_ψ       | Nerium_oleander_TLA109_hss_exon4-7_ψ       |                                           | IXXXD  | G. Ionta 416 (FLAS)             | ON793509 |
| Nerieae | <i>Nerium oleander</i> L.                   | Nerium_oleander_TLA109_contig2_hss_exon5-6         | Nerium_oleander_TLA109_hss_exon5-6         |                                           | IXXXD  | G. Ionta 416 (FLAS)             | ON793510 |
| Nerieae | <i>Nerium oleander</i> L.                   | Nerium_oleander_TLA109_contig3_dhs_exon1-3         | Nerium_oleander_TLA109_dhs_exon1-3         |                                           |        | G. Ionta 416 (FLAS)             | ON793511 |
| Nerieae | <i>Strophanthus boivinii</i> Baill.         | Strophanthus_boivinii_TLA133_contig0_dhs_exon1-4_ψ | Strophanthus_boivinii_TLA133_dhs_exon1-4_ψ |                                           |        | M. E. Endress s.n. 2.XII.03 (Z) | ON793512 |
| Nerieae | <i>Strophanthus boivinii</i> Baill.         | Strophanthus_boivinii_TLA133_contig1_hss_exon4-7   | Strophanthus_boivinii_TLA133_hss_exon1-7   | Strophanthus_boivinii_TLA133_hss_exon1-7  | VXXXD  | M. E. Endress s.n. 2.XII.03 (Z) | ON793513 |
| Nerieae | <i>Strophanthus boivinii</i> Baill.         | Strophanthus_boivinii_TLA133_contig2_hss_exon2-3   | Strophanthus_boivinii_TLA133_hss_exon1-7   | Strophanthus_boivinii_TLA133_hss_exon1-7  |        | M. E. Endress s.n. 2.XII.03 (Z) | ON793514 |
| Nerieae | <i>Strophanthus boivinii</i> Baill.         | Strophanthus_boivinii_TLA133_contig3_hss_exon1     | Strophanthus_boivinii_TLA133_hss_exon1-7   | Strophanthus_boivinii_TLA133_hss_exon1-7  |        | M. E. Endress s.n. 2.XII.03 (Z) | ON793515 |
| Nerieae | <i>Strophanthus boivinii</i> Baill.         | Strophanthus_boivinii_TLA133_contig4_dhs_exon1-2   | Strophanthus_boivinii_TLA133_dhs_exon1-2   |                                           |        | M. E. Endress s.n. 2.XII.03 (Z) | ON793516 |
| Nerieae | <i>Strophanthus boivinii</i> Baill.         | Strophanthus_boivinii_TLA133_contig5_dhs_exon1-7   | Strophanthus_boivinii_TLA133_dhs1_exon1-7  | Strophanthus_boivinii_TLA133_dhs1_exon1-7 | MXXXXN | M. E. Endress s.n. 2.XII.03 (Z) | ON793517 |
| Nerieae | <i>Strophanthus boivinii</i> Baill.         | Strophanthus_boivinii_TLA133_contig6_dhs_exon1-7   | Strophanthus_boivinii_TLA133_dhs2_exon1-7  | Strophanthus_boivinii_TLA133_dhs2_exon1-7 | MXXXXN | M. E. Endress s.n. 2.XII.03 (Z) | ON793518 |

|               |                                                   |                                                       |                                                |                                               |       |                                    |          |
|---------------|---------------------------------------------------|-------------------------------------------------------|------------------------------------------------|-----------------------------------------------|-------|------------------------------------|----------|
| Nerieae       | <i>Strophanthus boivinii</i><br>Baill.            | Strophanthus_boivinii_TLA1<br>33_contig7_dhs_exon1-7  | Strophanthus_boivinii_TLA1<br>33_dhs3_exon1-7  | Strophanthus_boivinii_TLA1<br>33_dhs3_exon1-7 | MXXXN | M. E. Endress s.n.<br>2.XII.03 (Z) | ON793519 |
| Nerieae       | <i>Strophanthus preussii</i><br>Engl. & Pax       | Strophanthus_preussii                                 |                                                |                                               | IXX   | Livshultz et al. 2018              | MG817651 |
| Nerieae       | <i>Strophanthus preussii</i><br>Engl. & Pax       | Strophanthus_preussii_TLA1<br>0_contig0_dhs_exon1-7   | Strophanthus_preussii_TLA1<br>0_dhs_exon1-7    | Strophanthus_preussii_TLA1<br>0_dhs_exon1-7   | IXXXN | T. Livshultz 03_24 (BH)            | ON793520 |
| Nerieae       | <i>Strophanthus preussii</i><br>Engl. & Pax       | Strophanthus_preussii_TLA1<br>0_contig1_hss_exon2-3_ψ | Strophanthus_preussii_TLA1<br>0_hss_exon2-3_ψ1 |                                               |       | T. Livshultz 03_24 (BH)            | ON793521 |
| Nerieae       | <i>Strophanthus preussii</i><br>Engl. & Pax       | Strophanthus_preussii_TLA1<br>0_contig2_hss_exon2-3_ψ | Strophanthus_preussii_TLA1<br>0_hss_exon2-3_ψ2 |                                               |       | T. Livshultz 03_24 (BH)            | ON793522 |
| Nerieae       | <i>Strophanthus preussii</i><br>Engl. & Pax       | Strophanthus_preussii_TLA1<br>0_contig3_hss_exon2-6_ψ | Strophanthus_preussii_TLA1<br>0_hss_exon2-6_ψ3 |                                               | VXXXD | T. Livshultz 03_24 (BH)            | ON793523 |
| Nerieae       | <i>Strophanthus preussii</i><br>Engl. & Pax       | Strophanthus_preussii_TLA1<br>0_contig4_hss_exon2-6_ψ | Strophanthus_preussii_TLA1<br>0_hss_exon2-6_ψ4 |                                               | VXXXD | T. Livshultz 03_24 (BH)            | ON793524 |
| Odontadenieae | <i>Elytropus chilensis</i><br>(A.DC.) Müll.Arg.   | Elytropus_chilensis_dhs                               |                                                |                                               | IXXXN | Livshultz et al. 2018              | MG817662 |
| Odontadenieae | <i>Elytropus chilensis</i><br>(A.DC.) Müll.Arg.   | Elytropus_chilensis_hss                               |                                                |                                               | VXXXD | Livshultz et al. 2018              | MG817663 |
| Odontadenieae | <i>Elytropus chilensis</i><br>(A.DC.) Müll.Arg.   | Elytropus_chilensis_TL208_c<br>ontig0_hss_exon1-6     | Elytropus_chilensis_TL208_h<br>ss_exon1-6      | Elytropus_chilensis_TL208_h<br>ss_exon1-6     | VXXXD | Sobel & Strudwick 2740<br>(NY)     | ON793525 |
| Odontadenieae | <i>Elytropus chilensis</i><br>(A.DC.) Müll.Arg.   | Elytropus_chilensis_TL208_c<br>ontig1_dhs_exon1-7     | Elytropus_chilensis_TL208_d<br>hs_exon1-7      | Elytropus_chilensis_TL208_d<br>hs_exon1-7     | IXXXN | Sobel & Strudwick 2740<br>(NY)     | ON793526 |
| Odontadenieae | <i>Elytropus chilensis</i><br>(A.DC.) Müll.Arg.   | Elytropus_chilensis_TLA257<br>_contig0_hss_exon1-7    | Elytropus_chilensis_TLA257<br>_hss_exon1-7     | Elytropus_chilensis_TLA257<br>_hss_exon1-7    | VXXXN | M. Mihoc et al. 156934<br>(CONC)   | ON793527 |
| Odontadenieae | <i>Elytropus chilensis</i><br>(A.DC.) Müll.Arg.   | Elytropus_chilensis_TLA257<br>_contig1_dhs_exon1-7    | Elytropus_chilensis_TLA257<br>_dhs_exon1-7     | Elytropus_chilensis_TLA257<br>_dhs_exon1-7    | IXXXN | M. Mihoc et al. 156934<br>(CONC)   | ON793528 |
| Odontadenieae | <i>Odontadenia perrottetii</i><br>(A.DC.) Woodson | Odontadenia_perrottetii_PA6<br>0B_contig0_hss_exon1-7 | Odontadenia_perrottetii_PA6<br>0B_hss_exon1-7  | Odontadenia_perrottetii_PA6<br>0B_hss_exon1-7 | VXXXD | Prévost & Feuillet 3973<br>(CAY)   | ON793529 |

|               |                                                                  |                                                       |                                               |                                               |        |                                  |          |
|---------------|------------------------------------------------------------------|-------------------------------------------------------|-----------------------------------------------|-----------------------------------------------|--------|----------------------------------|----------|
| Odontadenieae | <i>Odontadenia perrottetii</i><br>(A.DC.) Woodson                | Odontadenia_perrottetii_PA6<br>0B_contig1_hss_exon4-5 | Odontadenia_perrottetii_PA6<br>0B_hss_exon4-5 |                                               |        | Prévost & Feuillet 3973<br>(CAY) | ON793530 |
| Odontadenieae | <i>Odontadenia perrottetii</i><br>(A.DC.) Woodson                | Odontadenia_perrottetii_PA6<br>0B_contig2_dhs_exon1-7 | Odontadenia_perrottetii_PA6<br>0B_dhs_exon1-7 | Odontadenia_perrottetii_PA6<br>0B_dhs_exon1-7 | IXXXN  | Prévost & Feuillet 3973<br>(CAY) | ON793531 |
| Odontadenieae | <i>Odontadenia perrottetii</i><br>(A.DC.) Woodson                | Odontadenia_perrottetii                               |                                               |                                               | VXXXD  | Livshultz et al. 2018            | MG817687 |
| Odontadenieae | <i>Pinochia corymbosa</i><br>(Jacq.) M.E.Endress &<br>B.F.Hansen | Pinochia_corymbosa_TL96_c<br>ontig0_hss_exon1-7       | Pinochia_corymbosa_TL96_h<br>ss_exon1-7       | Pinochia_corymbosa_TL96_h<br>ss_exon1-7       | VXXXD  | E. Santiago 97-6 (Z)             | ON793532 |
| Odontadenieae | <i>Pinochia corymbosa</i><br>(Jacq.) M.E.Endress &<br>B.F.Hansen | Pinochia_corymbosa_TL96_c<br>ontig1_dhs_exon1-4       | Pinochia_corymbosa_TL96_d<br>hs_exon1-7       | Pinochia_corymbosa_TL96_d<br>hs_exon1-7       |        | E. Santiago 97-6 (Z)             | ON793533 |
| Odontadenieae | <i>Pinochia corymbosa</i><br>(Jacq.) M.E.Endress &<br>B.F.Hansen | Pinochia_corymbosa_TL96_c<br>ontig10_hss_exon2-3_Ψ    | Pinochia_corymbosa_TL96_h<br>ss_exon2-3_Ψ5    |                                               |        | E. Santiago 97-6 (Z)             | ON793542 |
| Odontadenieae | <i>Pinochia corymbosa</i><br>(Jacq.) M.E.Endress &<br>B.F.Hansen | Pinochia_corymbosa_TL96_c<br>ontig11_hss_exon6-7_Ψ    | Pinochia_corymbosa_TL96_h<br>ss_exon6-7_Ψ6    |                                               | IXXXXD | E. Santiago 97-6 (Z)             | ON793543 |
| Odontadenieae | <i>Pinochia corymbosa</i><br>(Jacq.) M.E.Endress &<br>B.F.Hansen | Pinochia_corymbosa_TL96_c<br>ontig2_dhs_exon1-4       | Pinochia_corymbosa_TL96_d<br>hs_exon1-7       | Pinochia_corymbosa_TL96_d<br>hs_exon1-7       |        | E. Santiago 97-6 (Z)             | ON793534 |
| Odontadenieae | <i>Pinochia corymbosa</i><br>(Jacq.) M.E.Endress &<br>B.F.Hansen | Pinochia_corymbosa_TL96_c<br>ontig3_hss_exon1-4_Ψ     | Pinochia_corymbosa_TL96_h<br>ss_exon1-4_Ψ1    |                                               |        | E. Santiago 97-6 (Z)             | ON793535 |
| Odontadenieae | <i>Pinochia corymbosa</i><br>(Jacq.) M.E.Endress &<br>B.F.Hansen | Pinochia_corymbosa_TL96_c<br>ontig4_dhs_exon5-7       | Pinochia_corymbosa_TL96_d<br>hs_exon1-7       | Pinochia_corymbosa_TL96_d<br>hs_exon1-7       | IXXXN  | E. Santiago 97-6 (Z)             | ON793536 |
| Odontadenieae | <i>Pinochia corymbosa</i><br>(Jacq.) M.E.Endress &<br>B.F.Hansen | Pinochia_corymbosa_TL96_c<br>ontig5_hss_exon1-3       | Pinochia_corymbosa_TL96_h<br>ss_exon1-3       |                                               |        | E. Santiago 97-6 (Z)             | ON793537 |
| Odontadenieae | <i>Pinochia corymbosa</i><br>(Jacq.) M.E.Endress &<br>B.F.Hansen | Pinochia_corymbosa_TL96_c<br>ontig6_hss_exon6_Ψ       | Pinochia_corymbosa_TL96_h<br>ss_exon6_Ψ2      |                                               | IXXXXD | E. Santiago 97-6 (Z)             | ON793538 |
| Odontadenieae | <i>Pinochia corymbosa</i><br>(Jacq.) M.E.Endress &<br>B.F.Hansen | Pinochia_corymbosa_TL96_c<br>ontig7_dhs_exon6-7       | Pinochia_corymbosa_TL96_d<br>hs_exon1-7       | Pinochia_corymbosa_TL96_d<br>hs_exon1-7       | IXXXN  | E. Santiago 97-6 (Z)             | ON793539 |
| Odontadenieae | <i>Pinochia corymbosa</i><br>(Jacq.) M.E.Endress &<br>B.F.Hansen | Pinochia_corymbosa_TL96_c<br>ontig8_hss_exon2-3_Ψ     | Pinochia_corymbosa_TL96_h<br>ss_exon2-3_Ψ3    |                                               |        | E. Santiago 97-6 (Z)             | ON793540 |
| Odontadenieae | <i>Pinochia corymbosa</i><br>(Jacq.) M.E.Endress &<br>B.F.Hansen | Pinochia_corymbosa_TL96_c<br>ontig9_hss_exon2_Ψ       | Pinochia_corymbosa_TL96_h<br>ss_exon2_Ψ4      |                                               |        | E. Santiago 97-6 (Z)             | ON793541 |

|                |                                                        |                                                       |                                               |                                               |       |                                    |          |
|----------------|--------------------------------------------------------|-------------------------------------------------------|-----------------------------------------------|-----------------------------------------------|-------|------------------------------------|----------|
| Odontadenieae  | <i>Secondatia densiflora</i><br>A.DC.                  | Secondatia_densiflora                                 |                                               |                                               | VXXXD | Livshultz et al. 2018              | MG817660 |
| Odontadenieae  | <i>Secondatia densiflora</i><br>A.DC.                  | Secondatia_densiflora_dhs                             |                                               |                                               | IXXXN | Livshultz et al. 2018              | MG817659 |
| Odontadenieae  | <i>Secondatia densiflora</i><br>A.DC.                  | Secondatia_densiflora_PA62<br>B_contig0_hss_exon1-7   | Secondatia_densiflora_PA62<br>B_hss_exon1-7   | Secondatia_densiflora_PA62<br>B_hss_exon1-7   | VXXXD | A. Simões et al. 1218<br>(UEC)     | ON793544 |
| Odontadenieae  | <i>Secondatia densiflora</i><br>A.DC.                  | Secondatia_densiflora_PA62<br>B_contig1_dhs_exon1-4   | Secondatia_densiflora_PA62<br>B_dhs_exon1-4   |                                               |       | A. Simões et al. 1218<br>(UEC)     | ON793545 |
| Odontadenieae  | <i>Secondatia densiflora</i><br>A.DC.                  | Secondatia_densiflora_PA62<br>B_contig2_dhs_exon1-7   | Secondatia_densiflora_PA62<br>B_dhs_exon1-7   | Secondatia_densiflora_PA62<br>B_dhs_exon1-7   | IXXXN | A. Simões et al. 1218<br>(UEC)     | ON793546 |
| Odontadenieae  | <i>Stipecoma peltigera</i><br>(Stadelm.) Müll.Arg.     | Stipecoma_peltigera_TLA13<br>4_contig0_hss_exon1-6    | Stipecoma_peltigera_TLA13<br>4_hss_exon1-6    | Stipecoma_peltigera_TLA13<br>4_hss_exon1-6    | VXXXD | L. S. Kinoshita s.n.<br>(UEC)      | ON793547 |
| Odontadenieae  | <i>Stipecoma peltigera</i><br>(Stadelm.) Müll.Arg.     | Stipecoma_peltigera_TLA13<br>4_contig1_dhs_exon1-4    | Stipecoma_peltigera_TLA13<br>4_dhs_exon1-7    | Stipecoma_peltigera_TLA13<br>4_dhs_exon1-7    |       | L. S. Kinoshita s.n.<br>(UEC)      | ON793548 |
| Odontadenieae  | <i>Stipecoma peltigera</i><br>(Stadelm.) Müll.Arg.     | Stipecoma_peltigera_TLA13<br>4_contig2_dhs_exon5-7    | Stipecoma_peltigera_TLA13<br>4_dhs_exon1-7    | Stipecoma_peltigera_TLA13<br>4_dhs_exon1-7    | IXXXN | L. S. Kinoshita s.n.<br>(UEC)      | ON793549 |
| Periplocoideae | <i>Finlaysonia insularum</i><br>(King & Gamble) Venter | Finlaysonia_insularum                                 |                                               |                                               | IXXXD | Livshultz et al. 2018              | MG817700 |
| Periplocoideae | <i>Finlaysonia insularum</i><br>(King & Gamble) Venter | Finlaysonia_insularum_TL63<br>_contig0_dhs_exon1-7    | Finlaysonia_insularum_TL63<br>_dhs1_exon1-7   | Finlaysonia_insularum_TL63<br>_dhs1_exon1-7   | IXXXN | D. J. Middleton et al.<br>1164 (A) | ON793550 |
| Periplocoideae | <i>Finlaysonia insularum</i><br>(King & Gamble) Venter | Finlaysonia_insularum_TL63<br>_contig1_hss_exon1-6    | Finlaysonia_insularum_TL63<br>_hss_exon1-6    | Finlaysonia_insularum_TL63<br>_hss_exon1-6    | IXXXD | D. J. Middleton et al.<br>1164 (A) | ON793551 |
| Periplocoideae | <i>Finlaysonia insularum</i><br>(King & Gamble) Venter | Finlaysonia_insularum_TL63<br>_contig2_dhs_exon1-7    | Finlaysonia_insularum_TL63<br>_dhs2_exon1-7   | Finlaysonia_insularum_TL63<br>_dhs2_exon1-7   | IXXXN | D. J. Middleton et al.<br>1164 (A) | ON793552 |
| Periplocoideae | <i>Finlaysonia lanuginosa</i><br>(Ridl.) Venter        | Finlaysonia_lanuginosa_TLP<br>286_contig0_dhs_exon1-7 | Finlaysonia_lanuginosa_TLP<br>286_dhs_exon1-7 | Finlaysonia_lanuginosa_TLP<br>286_dhs_exon1-7 | IXXXN | D. J. Middleton et al.<br>4069 (E) | ON793553 |
| Periplocoideae | <i>Finlaysonia lanuginosa</i><br>(Ridl.) Venter        | Finlaysonia_lanuginosa_TLP<br>286_contig1_hss_exon1-7 | Finlaysonia_lanuginosa_TLP<br>286_hss_exon1-7 | Finlaysonia_lanuginosa_TLP<br>286_hss_exon1-7 | IXXXD | D. J. Middleton et al.<br>4069 (E) | ON793554 |
| Periplocoideae | <i>Gymnanthera oblonga</i><br>(Burm.f.) P.S.Green      | Gymnanthera_oblonga                                   |                                               |                                               | IXXXN | Livshultz et al. 2018              | MG817701 |
| Periplocoideae | <i>Gymnanthera oblonga</i><br>(Burm.f.) P.S.Green      | Gymnanthera_oblonga_TLP2<br>74_contig0_hss_exon3-4    | Gymnanthera_oblonga_TLP2<br>74_hss_exon2-6    | Gymnanthera_oblonga_TLP2<br>74_hss_exon2-6    |       | A. Ford 2607 (BRI)                 | ON793555 |

|                |                                                   |                                                      |                                               |                                             |       |                                   |          |
|----------------|---------------------------------------------------|------------------------------------------------------|-----------------------------------------------|---------------------------------------------|-------|-----------------------------------|----------|
| Periplocoideae | <i>Gymnanthera oblonga</i><br>(Burm.f.) P.S.Green | Gymnanthera_oblonga_TLP2<br>74_contig1_hss_exon5-6   | Gymnanthera_oblonga_TLP2<br>74_hss_exon2-6    | Gymnanthera_oblonga_TLP2<br>74_hss_exon2-6  | IXXXD | A. Ford 2607 (BRI)                | ON793556 |
| Periplocoideae | <i>Gymnanthera oblonga</i><br>(Burm.f.) P.S.Green | Gymnanthera_oblonga_TLP2<br>74_contig2_hss_exon2     | Gymnanthera_oblonga_TLP2<br>74_hss_exon2-6    | Gymnanthera_oblonga_TLP2<br>74_hss_exon2-6  |       | A. Ford 2607 (BRI)                | ON793557 |
| Periplocoideae | <i>Gymnanthera oblonga</i><br>(Burm.f.) P.S.Green | Gymnanthera_oblonga_TLP2<br>74_contig3_dhs_exon1-6   | Gymnanthera_oblonga_TLP2<br>74_dhs_exon1-6    | Gymnanthera_oblonga_TLP2<br>74_dhs_exon1-6  | IXXXN | A. Ford 2607 (BRI)                | ON793558 |
| Periplocoideae | <i>Petopentia natalensis</i><br>(Schltr.) Bullock | Petopentia_natalensis_TLP78<br>_contig0_dhs_exon1-7  | Petopentia_natalensis_TLP78<br>_dhs_exon1-7   | Petopentia_natalensis_TLP78<br>_dhs_exon1-7 | IXXXN | T. Livshultz 03-2 (BH)            | ON793559 |
| Periplocoideae | <i>Petopentia natalensis</i><br>(Schltr.) Bullock | Petopentia_natalensis_TLP78<br>_contig1_hss_exon1-7  | Petopentia_natalensis_TLP78<br>_hss_exon1-7   | Petopentia_natalensis_TLP78<br>_hss_exon1-7 | IXXXD | T. Livshultz 03-2 (BH)            | ON793560 |
| Periplocoideae | <i>Phyllanthera grayi</i><br>(P.I.Forst.) Venter  | Phyllanthera_grayi                                   |                                               |                                             | IXXXN | Livshultz et al. 2018             | MG817699 |
| Periplocoideae | <i>Raphionacme flanaganii</i><br>Schltr.          | Raphionacme_flanaganii                               |                                               |                                             | IXXXD | Livshultz et al. 2018             | MG817702 |
| Periplocoideae | <i>Raphionacme flanaganii</i><br>Schltr.          | Raphionacme_flanaganii_P79<br>_contig0_hss_exon1-6   | Raphionacme_flanaganii_P79<br>_hss_exon1-6    | Raphionacme_flanaganii_P79<br>_hss_exon1-6  | IXXXD | T. Livshultz 03_23 (BH)           | ON793561 |
| Periplocoideae | <i>Raphionacme flanaganii</i><br>Schltr.          | Raphionacme_flanaganii_P79<br>_contig1_hss_exon4-6   | Raphionacme_flanaganii_P79<br>_hss_exon4-6    |                                             | IXXXD | T. Livshultz 03_23 (BH)           | ON793562 |
| Periplocoideae | <i>Raphionacme flanaganii</i><br>Schltr.          | Raphionacme_flanaganii_P79<br>_contig2_hss_exon5-6_∩ | Raphionacme_flanaganii_P79<br>_hss_exon5-6_∩1 |                                             | IXXXD | T. Livshultz 03_23 (BH)           | ON793563 |
| Periplocoideae | <i>Raphionacme flanaganii</i><br>Schltr.          | Raphionacme_flanaganii_P79<br>_contig3_hss_exon5_∩   | Raphionacme_flanaganii_P79<br>_hss_exon5_∩2   |                                             |       | T. Livshultz 03_23 (BH)           | ON793564 |
| Periplocoideae | <i>Raphionacme flanaganii</i><br>Schltr.          | Raphionacme_flanaganii_P79<br>_contig4_hss_exon5-6_∩ | Raphionacme_flanaganii_P79<br>_hss_exon5-6_∩3 |                                             | IXXXD | T. Livshultz 03_23 (BH)           | ON793565 |
| Periplocoideae | <i>Raphionacme flanaganii</i><br>Schltr.          | Raphionacme_flanaganii_P79<br>_contig5_hss_exon4-6_∩ | Raphionacme_flanaganii_P79<br>_hss_exon5-6_∩4 |                                             | IXXXD | T. Livshultz 03_23 (BH)           | ON793566 |
| Periplocoideae | <i>Raphionacme flanaganii</i><br>Schltr.          | Raphionacme_flanaganii_P79<br>_contig6_dhs_exon1-7   | Raphionacme_flanaganii_P79<br>_dhs_exon1-7    | Raphionacme_flanaganii_P79<br>_dhs_exon1-7  | IXXXN | T. Livshultz 03_23 (BH)           | ON793567 |
| Periplocoideae | <i>Raphionacme flanaganii</i><br>Schltr.          | Raphionacme_flanaganii_P79<br>_contig7_hss_exon5-6_∩ | Raphionacme_flanaganii_P79<br>_hss_exon5-6_∩5 |                                             | IXXXD | T. Livshultz 03_23 (BH)           | ON793568 |
| Periplocoideae | <i>Zygostelma benthamii</i><br>Baill.             | Zygostelma_benthamii_TL10<br>5_contig0_dhs_exon1-7   | Zygostelma_benthamii_TL10<br>5_dhs_exon1-7    | Zygostelma_benthamii_TL10<br>5_dhs_exon1-7  | IXXXN | D. J. Middleton et al. 849<br>(A) | ON793569 |

|                |                                                 |                                                  |                                          |                                       |       |                                    |          |
|----------------|-------------------------------------------------|--------------------------------------------------|------------------------------------------|---------------------------------------|-------|------------------------------------|----------|
| Periplocoideae | <i>Zygostelma benthamii</i> Baill.              | Zygostelma_benthamii_TL105_contig1_hss_exon1-4_ψ | Zygostelma_benthamii_TL105_hss_exon1-7_ψ |                                       |       | D. J. Middleton et al. 849 (A)     | ON793570 |
| Periplocoideae | <i>Zygostelma benthamii</i> Baill.              | Zygostelma_benthamii_TL105_contig2_hss_exon5-7   | Zygostelma_benthamii_TL105_hss_exon1-7_ψ |                                       | IXXXD | D. J. Middleton et al. 849 (A)     | ON793571 |
| Plumerieae     | <i>Allamanda schottii</i> Pohl                  | Allamanda_schottii                               |                                          |                                       | IXXXN | Livshultz et al. 2018              | MG817714 |
| Plumerieae     | <i>Allamanda schottii</i> Pohl                  | Allamanda_schottii_46_contig0_dhs_exon1-7        | Allamanda_schottii_46_dhs_exon1-7        | Allamanda_schottii_46_dhs_exon1-7     | IXXXN | T. Livshultz 03_26 (BH)            | ON793572 |
| Plumerieae     | <i>Cerbera manghas</i> L.                       | Cerbera_manghas                                  |                                          |                                       | IXXXN | Livshultz et al. 2018              | MG817706 |
| Plumerieae     | <i>Himatanthus bracteatus</i> (A.DC.) Woodson   | Himatanthus_bracteatus                           | Himatanthus_bracteatus                   | Himatanthus_bracteatus                | IXXXN | Livshultz et al. 2018              | MG817708 |
| Plumerieae     | <i>Himatanthus obovatus</i> (Müll.Arg.) Woodson | Himatanthus_obovatus_PA99_contig0_dhs_exon1-7    | Himatanthus_obovatus_PA99_dhs_exon1-7    | Himatanthus_obovatus_PA99_dhs_exon1-7 | IXXXN | Kinoshita 02/109 (UEC)             | ON793573 |
| Plumerieae     | <i>Plumeria cubensis</i> Urb.                   | Plumeria_cubensis                                |                                          |                                       | IXXXN | Livshultz et al. 2018              | MG817704 |
| Plumerieae     | <i>Plumeria cubensis</i> Urb.                   | Plumeria_cubensis_48_contig0_dhs_exon1-7         | Plumeria_cubensis_48_dhs_exon1-7         | Plumeria_cubensis_48_dhs_exon1-7      | IXXXN | M.E. Endress s.n. Aug. 2003 (PTBG) | ON793574 |
| Plumerieae     | <i>Thevetia peruviana</i> (Pers.) K.Schum.      | Thevetia_peruviana                               |                                          |                                       | IXXXN | Livshultz et al. 2018              | MG817705 |
| Plumerieae     | <i>Thevetia peruviana</i> (Pers.) K.Schum.      | Thevetia_peruviana_56_contig0_dhs_exon1-4        | Thevetia_peruviana_56_dhs_exon1-7        | Thevetia_peruviana_56_dhs_exon1-7     |       | T. Livshultz TL03-34 (GH)          | ON793575 |
| Plumerieae     | <i>Thevetia peruviana</i> (Pers.) K.Schum.      | Thevetia_peruviana_56_contig1_dhs_exon5-7        | Thevetia_peruviana_56_dhs_exon1-7        | Thevetia_peruviana_56_dhs_exon1-7     | IXXXN | T. Livshultz TL03-34 (GH)          | ON793576 |
| Rhadadenieae   | <i>Rhabdadenia biflora</i> (Jacq.) Müll.Arg.    | Rhabdadenia_biflora_1                            | Rhabdadenia_biflora_1                    | Rhabdadenia_biflora_1                 | IXXXD | Livshultz et al. 2018              | MG817691 |
| Rhadadenieae   | <i>Rhabdadenia biflora</i> (Jacq.) Müll.Arg.    | Rhabdadenia_biflora_2                            |                                          |                                       | IXXXN | Livshultz et al. 2018              | MG817690 |
| Rhadadenieae   | <i>Rhabdadenia madida</i> (Vell.) Miers         | Rhabdadenia_madida_contig1_TL206_dhs_exon1-3     | Rhabdadenia_madida_TL206_dhs_exon1-7     | Rhabdadenia_madida_TL206_dhs_exon1-7  |       | Smith et al. 776 (NY)              | ON793577 |
| Rhadadenieae   | <i>Rhabdadenia madida</i> (Vell.) Miers         | Rhabdadenia_madida_TL206_contig0_hss_exon1-7     | Rhabdadenia_madida_TL206_hss_exon1-7     | Rhabdadenia_madida_TL206_hss_exon1-7  | IXXXD | Smith et al. 776 (NY)              | ON793578 |



|                   |                                                 |                                                       |                                               |                                               |       |                                                                                                                           |          |
|-------------------|-------------------------------------------------|-------------------------------------------------------|-----------------------------------------------|-----------------------------------------------|-------|---------------------------------------------------------------------------------------------------------------------------|----------|
| Rhadadenieae      | <i>Rhabdadenia madida</i> (Vell.) Miers         | Rhabdadenia_madida_TL206_contig2_dhs_exon4-7          | Rhabdadenia_madida_TL206_dhs_exon1-7          | Rhabdadenia_madida_TL206_dhs_exon1-7          | IXXXN | Smith et al. 776 (NY)                                                                                                     | ON793579 |
| Secamonoideae     | <i>Toxocarpus villosus</i> (Blume) Decne.       | Toxocarpus_villosus_TLS261_contig0_hss_exon1-7        | Toxocarpus_villosus_TLS261_hss_exon1-7        | Toxocarpus_villosus_TLS261_hss_exon1-7        | IXXXD | D. J. Middleton et al. 1341 (A)                                                                                           | ON793580 |
| Secamonoideae     | <i>Toxocarpus villosus</i> (Blume) Decne.       | Toxocarpus_villosus_TLS261_contig1_dhs_exon1-4        | Toxocarpus_villosus_TLS261_dhs_exon1-7        | Toxocarpus_villosus_TLS261_dhs_exon1-7        |       | D. J. Middleton et al. 1341 (A)                                                                                           | ON793581 |
| Secamonoideae     | <i>Toxocarpus villosus</i> (Blume) Decne.       | Toxocarpus_villosus_TLS261_contig2_dhs_exon5-7        | Toxocarpus_villosus_TLS261_dhs_exon1-7        | Toxocarpus_villosus_TLS261_dhs_exon1-7        | IXXXN | D. J. Middleton et al. 1341 (A)                                                                                           | ON793582 |
| Tabernaemontaneae | <i>Tabernaemontana bufalina</i> Lour.           | Tabernaemontana_bufalina_P_A92_contig0_dhs_exon1-4    | Tabernaemontana_bufalina_P_A92_dhs_exon1-7    | Tabernaemontana_bufalina_P_A92_dhs_exon1-7    |       | D. J. Middleton et al. 1749 (A)                                                                                           | ON793583 |
| Tabernaemontaneae | <i>Tabernaemontana bufalina</i> Lour.           | Tabernaemontana_bufalina_P_A92_contig1_dhs_exon5-7    | Tabernaemontana_bufalina_P_A92_dhs_exon1-7    | Tabernaemontana_bufalina_P_A92_dhs_exon1-7    | IXXXN | D. J. Middleton et al. 1749 (A)                                                                                           | ON793584 |
| Tabernaemontaneae | <i>Tabernaemontana bufalina</i> Lour.           | Tabernaemontana_bufalina_P_A93_contig0_dhs_exon1-4    | Tabernaemontana_bufalina_P_A93_dhs_exon1-7    | Tabernaemontana_bufalina_P_A93_dhs_exon1-7    |       | D. J. Middleton et al. 2615 (A)                                                                                           | ON793585 |
| Tabernaemontaneae | <i>Tabernaemontana bufalina</i> Lour.           | Tabernaemontana_bufalina_P_A93_contig1_dhs_exon5-7    | Tabernaemontana_bufalina_P_A93_dhs_exon1-7    | Tabernaemontana_bufalina_P_A93_dhs_exon1-7    | IXXXN | D. J. Middleton et al. 2615 (A)                                                                                           | ON793586 |
| Tabernaemontaneae | <i>Tabernaemontana elegans</i> Stapf            | Tabernaemontana_elegans                               | Tabernaemontana_elegans                       | Tabernaemontana_elegans                       | IXXXN | Phytometasyn, <a href="https://bioinformatics.tugraz.at/phytometasyn/">https://bioinformatics.tugraz.at/phytometasyn/</a> | MG805361 |
| Tabernaemontaneae | <i>Tabernaemontana pandacaqui</i> Poir.         | Tabernaemontana_pandacaqui_PA94_contig0_dhs_exon1-4   | Tabernaemontana_pandacaqui_PA94_dhs_exon1-7   | Tabernaemontana_pandacaqui_PA94_dhs_exon1-7   |       | D. J. Middleton et al. 1385 (A)                                                                                           | ON793587 |
| Tabernaemontaneae | <i>Tabernaemontana pandacaqui</i> Poir.         | Tabernaemontana_pandacaqui_PA94_contig1_dhs_exon5-7   | Tabernaemontana_pandacaqui_PA94_dhs_exon1-7   | Tabernaemontana_pandacaqui_PA94_dhs_exon1-7   | IXXXN | D. J. Middleton et al. 1385 (A)                                                                                           | ON793588 |
| Tabernaemontaneae | <i>Tabernaemontana peduncularis</i> Wall.       | Tabernaemontana_peduncularis_PA95_contig0_dhs_exon1-4 | Tabernaemontana_peduncularis_PA95_dhs_exon1-7 | Tabernaemontana_peduncularis_PA95_dhs_exon1-7 |       | D. J. Middleton et al. 2905 (A)                                                                                           | ON793589 |
| Tabernaemontaneae | <i>Tabernaemontana peduncularis</i> Wall.       | Tabernaemontana_peduncularis_PA95_contig1_dhs_exon5-7 | Tabernaemontana_peduncularis_PA95_dhs_exon1-7 | Tabernaemontana_peduncularis_PA95_dhs_exon1-7 | IXXXN | D. J. Middleton et al. 2905 (A)                                                                                           | ON793590 |
| Vinceae           | <i>Catharanthus longifolius</i> (Pichon) Pichon | Catharanthus_longifolius                              | Catharanthus_longifolius                      | Catharanthus_longifolius                      | IXXXN | Phytometasyn, <a href="https://bioinformatics.tugraz.at/phytometasyn/">https://bioinformatics.tugraz.at/phytometasyn/</a> | MG805365 |

|         |                                                    |                                                |                                        |                                      |       |                                                                                                                              |              |
|---------|----------------------------------------------------|------------------------------------------------|----------------------------------------|--------------------------------------|-------|------------------------------------------------------------------------------------------------------------------------------|--------------|
| Vinceae | <i>Catharanthus ovalis</i><br>Markgr.              | Catharanthus_ovalis                            | Catharanthus_ovalis                    | Catharanthus_ovalis                  | IXXXN | Phytometasyn,<br><a href="https://bioinformatics.tugraz.at/phytometasyn/">https://bioinformatics.tugraz.at/phytometasyn/</a> | MG805366     |
| Vinceae | <i>Catharanthus roseus</i> (L.)<br>G.Don           | Catharanthus_roseus                            | Catharanthus_roseus                    | Catharanthus_roseus                  | IXXXN | Medicinal Plant<br>Genomics Resource                                                                                         | GACD01064297 |
| Vinceae | <i>Kametia chandeei</i><br>D.J.Middleton           | Kametia_chandeei                               | Kametia_chandeei                       | Kametia_chandeei                     | IXXXN | Livshultz et al. 2018                                                                                                        | MG817703     |
| Vinceae | <i>Kopsia rosea</i><br>D.J.Middleton               | Kopsia_rosea                                   |                                        |                                      | IXXXN | Livshultz et al. 2018                                                                                                        | MG817711     |
| Vinceae | <i>Kopsia rosea</i><br>D.J.Middleton               | Kopsia_rosea_69_contig0_dhs_exon1-7            | Kopsia_rosea_69_dhs_exon1-7            | Kopsia_rosea_69_dhs_exon1-7          | IXXXN | D. J. Middleton et al. 4105 (A)                                                                                              | ON793591     |
| Vinceae | <i>Ochrosia coccinea</i><br>(Teijsm. & Binn.) Miq. | Ochrosia_coccinea_PA88_contig0_dhs_exon1-4     | Ochrosia_coccinea_PA88_dhs_exon1-7     | Ochrosia_coccinea_PA88_dhs_exon1-7   |       | W. Takeuchi 14422 (A)                                                                                                        | ON793592     |
| Vinceae | <i>Ochrosia coccinea</i><br>(Teijsm. & Binn.) Miq. | Ochrosia_coccinea_PA88_contig1_dhs_exon1-7_ψ   | Ochrosia_coccinea_PA88_dhs_exon1-7_ψ   |                                      | TXXXD | W. Takeuchi 14422 (A)                                                                                                        | ON793593     |
| Vinceae | <i>Ochrosia coccinea</i><br>(Teijsm. & Binn.) Miq. | Ochrosia_coccinea_PA88_contig2_dhs_exon5-7     | Ochrosia_coccinea_PA88_dhs_exon1-7     | Ochrosia_coccinea_PA88_dhs_exon1-7   | IXXXN | W. Takeuchi 14422 (A)                                                                                                        | ON793594     |
| Vinceae | <i>Ochrosia poweri</i><br>F.M.Bailey               | Ochrosia_poweri_PA89_contig0_dhs_exon1-4       | Ochrosia_poweri_PA89_dhs_exon1-7       | Ochrosia_poweri_PA89_dhs_exon1-7     |       | D. J. Middleton 705 (A)                                                                                                      | ON793595     |
| Vinceae | <i>Ochrosia poweri</i><br>F.M.Bailey               | Ochrosia_poweri_PA89_contig1_dhs_exon1-7_ψ     | Ochrosia_poweri_PA89_dhs_exon1-7_ψ1    |                                      | IXXXD | D. J. Middleton 705 (A)                                                                                                      | ON793596     |
| Vinceae | <i>Ochrosia poweri</i><br>F.M.Bailey               | Ochrosia_poweri_PA89_contig2_dhs_exon5-7       | Ochrosia_poweri_PA89_dhs_exon1-7       | Ochrosia_poweri_PA89_dhs_exon1-7     | IXXXN | D. J. Middleton 705 (A)                                                                                                      | ON793597     |
| Vinceae | <i>Ochrosia poweri</i><br>F.M.Bailey               | Ochrosia_poweri_PA89_contig3_dhs_exon3_ψ       | Ochrosia_poweri_PA89_dhs_exon3_ψ2      |                                      |       | D. J. Middleton 705 (A)                                                                                                      | ON793598     |
| Vinceae | <i>Rauvolfia balansae</i> (Baill.)<br>Boiteau      | Rauvolfia_balansae_PA106_contig0_dhs_exon1-4   | Rauvolfia_balansae_PA106_dhs_exon1-7   | Rauvolfia_balansae_PA106_dhs_exon1-7 |       | P. P. Lowry II et al. 5784 (MO)                                                                                              | ON793599     |
| Vinceae | <i>Rauvolfia balansae</i> (Baill.)<br>Boiteau      | Rauvolfia_balansae_PA106_contig1_dhs_exon5-7   | Rauvolfia_balansae_PA106_dhs_exon1-7   | Rauvolfia_balansae_PA106_dhs_exon1-7 | IXXXN | P. P. Lowry II et al. 5784 (MO)                                                                                              | ON793600     |
| Vinceae | <i>Rauvolfia balansae</i> (Baill.)<br>Boiteau      | Rauvolfia_balansae_PA106_contig2_dhs_exon1-4_ψ | Rauvolfia_balansae_PA106_dhs_exon1-4_ψ |                                      |       | P. P. Lowry II et al. 5784 (MO)                                                                                              | ON793601     |

|            |                                                 |                                                 |                                         |                                         |       |                                                                                                                              |                                             |
|------------|-------------------------------------------------|-------------------------------------------------|-----------------------------------------|-----------------------------------------|-------|------------------------------------------------------------------------------------------------------------------------------|---------------------------------------------|
| Vinceae    | <i>Rauvolfia serpentina</i> (L.) Benth. ex Kurz | Rauvolfia_serpentina                            | Rauvolfia_serpentina                    | Rauvolfia_serpentina                    | IXXXN | Medicinal Plant Genomics Resource                                                                                            | GACE01073238                                |
| Vinceae    | <i>Rauvolfia tetraphylla</i> L.                 | Rauvolfia_tetraphylla                           | Rauvolfia_tetraphylla                   | Rauvolfia_tetraphylla                   | IXXXN | 1KP,<br>www.onekp.com/public_data.html                                                                                       | scaffold-QEHE-2023261-Rauvolfia_tetraphylla |
| Vinceae    | <i>Rauvolfia verticillata</i> (Lour.) Baill.    | Rauvolfia_verticillata_PA91_contig0_dhs_exon1-4 | Rauvolfia_verticillata_PA91_dhs_exon1-7 | Rauvolfia_verticillata_PA91_dhs_exon1-7 |       | M. F. Newman et al. 1098 (A)                                                                                                 | ON793602                                    |
| Vinceae    | <i>Rauvolfia verticillata</i> (Lour.) Baill.    | Rauvolfia_verticillata_PA91_contig1_dhs_exon1   | Rauvolfia_verticillata_PA91_dhs_exon1-7 | Rauvolfia_verticillata_PA91_dhs_exon1-7 |       | M. F. Newman et al. 1098 (A)                                                                                                 | ON793603                                    |
| Vinceae    | <i>Rauvolfia verticillata</i> (Lour.) Baill.    | Rauvolfia_verticillata_PA91_contig2_dhs_exon5-7 | Rauvolfia_verticillata_PA91_dhs_exon1-7 | Rauvolfia_verticillata_PA91_dhs_exon1-7 | IXXXN | M. F. Newman et al. 1098 (A)                                                                                                 | ON793604                                    |
| Vinceae    | <i>Rauvolfia verticillata</i> (Lour.) Baill.    | Rauvolfia_verticillata_PA91_contig3_dhs_exon7   | Rauvolfia_verticillata_PA91_dhs_exon1-7 | Rauvolfia_verticillata_PA91_dhs_exon1-7 |       | M. F. Newman et al. 1098 (A)                                                                                                 | ON793605                                    |
| Vinceae    | <i>Rauvolfia vomitoria</i> Wennberg             | Rauvolfia_vomitoria_PA108_contig0_dhs_exon1-4   | Rauvolfia_vomitoria_PA108_dhs_exon1-7   | Rauvolfia_vomitoria_PA108_dhs_exon1-7   |       | J. R. Stone & R. Niangadouma 3521 (MO)                                                                                       | ON793606                                    |
| Vinceae    | <i>Rauvolfia vomitoria</i> Wennberg             | Rauvolfia_vomitoria_PA108_contig1_dhs_exon5-7   | Rauvolfia_vomitoria_PA108_dhs_exon1-7   | Rauvolfia_vomitoria_PA108_dhs_exon1-7   | IXXXN | J. R. Stone & R. Niangadouma 3521 (MO)                                                                                       | ON793607                                    |
| Vinceae    | <i>Vinca major</i> L.                           | Vinca_major_43_contig0_dhs_exon1-4              | Vinca_major_43_dhs_exon1-7              | Vinca_major_43_dhs_exon1-7              |       | M. Fishbein 7667 (OKLA)                                                                                                      | ON793608                                    |
| Vinceae    | <i>Vinca major</i> L.                           | Vinca_major_43_contig1_dhs_exon5-7              | Vinca_major_43_dhs_exon1-7              | Vinca_major_43_dhs_exon1-7              | IXXXN | M. Fishbein 7667 (OKLA)                                                                                                      | ON793609                                    |
| Vinceae    | <i>Vinca minor</i> L.                           | Vinca_minor                                     | Vinca_minor                             | Vinca_minor                             | IXXXN | Phytometasyn,<br><a href="https://bioinformatics.tugraz.at/phytometasyn/">https://bioinformatics.tugraz.at/phytometasyn/</a> | MG805362                                    |
| Wrightieae | <i>Pleioceras barteri</i> Baill.                | Pleioceras_barteri_TLA244_contig0_dhs_exon1-7   | Pleioceras_barteri_TLA244_dhs1_exon1-7  | Pleioceras_barteri_TLA244_dhs1_exon1-7  | IXXXN | Jongkind et al. 2131 (MO)                                                                                                    | ON793610                                    |
| Wrightieae | <i>Pleioceras barteri</i> Baill.                | Pleioceras_barteri_TLA244_contig1_dhs_exon1-7   | Pleioceras_barteri_TLA244_dhs2_exon1-7  | Pleioceras_barteri_TLA244_dhs2_exon1-7  | IXXXN | Jongkind et al. 2131 (MO)                                                                                                    | ON793611                                    |

|            |                                                            |                                                      |                                               |                                               |       |                                                                                         |                                           |
|------------|------------------------------------------------------------|------------------------------------------------------|-----------------------------------------------|-----------------------------------------------|-------|-----------------------------------------------------------------------------------------|-------------------------------------------|
| Wrightieae | <i>Stephanostema stenocarpum</i> K.Schum.                  | Stephanostema_stenocarpum_TLA232_contig0_dhs_exon1-4 | Stephanostema_stenocarpum_TLA232_dhs1_exon1-7 | Stephanostema_stenocarpum_TLA232_dhs1_exon1-7 |       | W. R. Q. Luke et al. 3754 (MO)                                                          | ON793612                                  |
| Wrightieae | <i>Stephanostema stenocarpum</i> K.Schum.                  | Stephanostema_stenocarpum_TLA232_contig1_dhs_exon5-7 | Stephanostema_stenocarpum_TLA232_dhs1_exon1-7 | Stephanostema_stenocarpum_TLA232_dhs1_exon1-7 | IXXXN | W. R. Q. Luke et al. 3754 (MO)                                                          | ON793613                                  |
| Wrightieae | <i>Stephanostema stenocarpum</i> K.Schum.                  | Stephanostema_stenocarpum_TLA232_contig2_dhs_exon1-3 | Stephanostema_stenocarpum_TLA232_dhs_exon1-3  |                                               |       | W. R. Q. Luke et al. 3754 (MO)                                                          | ON793614                                  |
| Wrightieae | <i>Stephanostema stenocarpum</i> K.Schum.                  | Stephanostema_stenocarpum_TLA232_contig3_dhs_exon1-3 | Stephanostema_stenocarpum_TLA232_dhs1_exon1-7 | Stephanostema_stenocarpum_TLA232_dhs1_exon1-7 |       | W. R. Q. Luke et al. 3754 (MO)                                                          | ON793615                                  |
| Wrightieae | <i>Stephanostema stenocarpum</i> K.Schum.                  | Stephanostema_stenocarpum_TLA232_contig4_dhs_exon5-6 | Stephanostema_stenocarpum_TLA232_dhs_exon5-6  |                                               |       | W. R. Q. Luke et al. 3754 (MO)                                                          | ON793616                                  |
| Wrightieae | <i>Stephanostema stenocarpum</i> K.Schum.                  | Stephanostema_stenocarpum_TLA232_contig5_dhs_exon1-7 | Stephanostema_stenocarpum_TLA232_dhs2_exon1-7 | Stephanostema_stenocarpum_TLA232_dhs2_exon1-7 | IXXXN | W. R. Q. Luke et al. 3754 (MO)                                                          | ON793617                                  |
| Wrightieae | <i>Wrightia arborea</i> (Dennst.) Mabb.                    | Wrightia_arborea_TLA91_contig0_dhs_exon1-7           | Wrightia_arborea_TLA91_dhs1_exon1-7           | Wrightia_arborea_TLA91_dhs1_exon1-7           | IXXXN | D. J. Middleton 240 (A)                                                                 | ON793618                                  |
| Wrightieae | <i>Wrightia arborea</i> (Dennst.) Mabb.                    | Wrightia_arborea_TLA91_contig1_dhs_exon1-7           | Wrightia_arborea_TLA91_dhs2_exon1-7           | Wrightia_arborea_TLA91_dhs2_exon1-7           | IXXXN | D. J. Middleton 240 (A)                                                                 | ON793619                                  |
| Wrightieae | <i>Wrightia lanceolata</i> Kerr                            | Wrightia_lanceolata_TL103_contig0_dhs_exon4          | Wrightia_lanceolata_TL103_dhs_exon4           |                                               |       | D. J. Middleton et al. 288 (A)                                                          | ON793620                                  |
| Wrightieae | <i>Wrightia lanceolata</i> Kerr                            | Wrightia_lanceolata_TL103_contig1_dhs_exon1-7        | Wrightia_lanceolata_TL103_dhs1_exon1-7        | Wrightia_lanceolata_TL103_dhs1_exon1-7        | IXXXN | D. J. Middleton et al. 288 (A)                                                          | ON793621                                  |
| Wrightieae | <i>Wrightia lanceolata</i> Kerr                            | Wrightia_lanceolata_TL103_contig2_dhs_exon1-7        | Wrightia_lanceolata_TL103_dhs2_exon1-7        | Wrightia_lanceolata_TL103_dhs2_exon1-7        | IXXXN | D. J. Middleton et al. 288 (A)                                                          | ON793622                                  |
| Wrightieae | <i>Wrightia natalensis</i> Stapf                           | Wrightia_natalensis                                  | Wrightia_natalensis                           | Wrightia_natalensis                           | IXXXN | 1KP, <a href="http://www.onekp.com/public_data.html">www.onekp.com/public_data.html</a> | scaffold-EDEQ-2004867-Wrightia_natalensis |
| Wrightieae | <i>Wrightia religiosa</i> (Teijsm. & Binn.) Benth. ex Kurz | Wrightia_religiosa_TL104_contig0_dhs_exon1-7         | Wrightia_religiosa_TL104_dhs1_exon1-7         | Wrightia_religiosa_TL104_dhs1_exon1-7         | IXXXN | D. J. Middleton 2033 (A)                                                                | ON793623                                  |
| Wrightieae | <i>Wrightia religiosa</i> (Teijsm. & Binn.) Benth. ex Kurz | Wrightia_religiosa_TL104_contig1_dhs_exon1-7         | Wrightia_religiosa_TL104_dhs2_exon1-7         | Wrightia_religiosa_TL104_dhs2_exon1-7         | IXXXN | D. J. Middleton 2033 (A)                                                                | ON793624                                  |

**Table S2:** Descriptions of each of six alignments constructed, including how it was analyzed, its source alignment(s), modification of the source alignment, alignment length in base pairs (except for the Human\_plant\_dhshss alignment, in amino acids), number of *HSS*- and *DHS*-like sequences and possible pseudogenes in each alignment, and the figures with trees constructed from each alignment.

| Alignment          | Analysis                                                                           | source alignment(s)                                  | modifications of source alignment                                                                                     | length (bp) | # <i>HSS</i> -like sequences | # <i>DHS</i> -like sequences | # pseudogene (non-terminal stop codon) | tree figure |
|--------------------|------------------------------------------------------------------------------------|------------------------------------------------------|-----------------------------------------------------------------------------------------------------------------------|-------------|------------------------------|------------------------------|----------------------------------------|-------------|
| Initial alignment  | Identification of <i>HSS</i> -like and <i>DHS</i> -like loci, contig concatenation | --                                                   | --                                                                                                                    | 1872        | 148                          | 233                          | 56                                     | Fig. S1     |
| Full dataset       | gene tree                                                                          | Initial alignment                                    | concatenation of partial contigs, exclusion of Sanger sequences from re-sequenced accessions.                         | 1861        | 123                          | 144                          | 56                                     | Fig. S2     |
| Reduced dataset    | Gene tree, ancestral state reconstruction, selection analysis                      | Full dataset                                         | exclusion of pseudogenes and partial sequences; trimming of 5' (37 bp) and 3' (65 bp) ends                            | 1162        | 104                          | 132                          | 0                                      | Fig. 4, S3  |
| Marsdenieae GARD   | test for recombination                                                             | Reduced dataset                                      | exclusion of non-Marsdenieae hss-like sequences, breaking of suspected recombinant sequences at identified breakpoint | 1086        | 39                           | 0                            | 0                                      | Fig. S4     |
| Human_plant_dhshss | inference of functional sites                                                      | Reduced dataset; Livshultz et al. 2018; Wator et al. |                                                                                                                       | 411 (aa)    |                              |                              |                                        |             |

**Table S3:** Primer sequences and annealing temperatures for mutagenesis of the *Parsonsia alboflavencens* HSS motif.

| Mutation                      | Primer sequence (forward and reverse, respectively) | Tannealing |
|-------------------------------|-----------------------------------------------------|------------|
| Single mutant V269I           | 5'- TTGTT CAGGATATTAGAAACATGGATGATGAGATTGTCCTTG-3'  | 53°C       |
|                               | 5'-TTCTAATATCCTGAACAATATCAACGATTAAACTTGCAGGATTG-3'  |            |
| Single mutant D273N           | 5'-GTTAGAAACATGAATGATGAGATTGTCCTTGCC-3'             | 53°C       |
|                               | 5'-ATTCATGTTTCTAACATCCTGAACAATATCAACGATT-3'         |            |
| Double mutant V269I and D273N | 5'-ATTGTT CAGGATATTAGAAACATGAATGATGAGATTGTC-3'      | 52°C       |
|                               | 5'-TTCTAATATCCTGAACAATATCAACGATTAAACTTGCAGGATTG-3'  |            |

**Table S4:** Percent (%) amino acid identity among sequences in the Full dataset alignment.

**Table S5:** Results of Shimodaira-Hasegawa (SH) tests comparing the fit of the full and reduced dataset topologies to the reduced dataset alignment as well as the monophyly (versus paraphyly) of the IXXXD HSS-like paralogs in Marsdenieae. Significant p values would indicate that the best fit topology is significantly more likely than the alternate (here, constrained) tree topology.

|   | Best Fit tree topology   | Constrained tree topology                         | D(LH) | p value |
|---|--------------------------|---------------------------------------------------|-------|---------|
| 1 | Reduced dataset (Fig. 4) | Full dataset (Fig. S3)                            | 23.93 | >0.05   |
| 2 | Reduced dataset (Fig. 4) | monophyletic Marsdenieae IXXXD HSS-like sequences | 4.56  | >0.05   |

**Table S6:** Reconstructions of the ancestral I269VXXXN273D amino acid motifs (joint and marginal results identical) on all branches of the full dataset topology tree (Fig. S3). The node numbers are in the labeled tree in Fig. S7, and the lettered branch labels in Figs. 3 and S3. The lower and upper end of the posterior probability of the marginal reconstruction are reported.

| Node # (Fig. S7) | Branch Label (Figs. 3, S3) | Pos. 269 reconstruction | Pos. 269 posterior probability (marginal) | Pos. 273 reconstruction | Pos. 273 posterior probabilities (marginal) |
|------------------|----------------------------|-------------------------|-------------------------------------------|-------------------------|---------------------------------------------|
| root             |                            | I                       | 0.901, 0.999                              | N                       | 0.990, 0.999                                |
| 1                |                            | I                       | 0.844, 1.000                              | N                       | 0.997, 1.000                                |
| 2                |                            | I                       | 1.000, 1.000                              | N                       | 1.000, 1.000                                |
| 3                |                            | I                       | 1.000, 1.000                              | N                       | 1.000, 1.000                                |
| 4                |                            | I                       | 1.000, 1.000                              | N                       | 1.000, 1.000                                |
| 5                |                            | I                       | 1.000, 1.000                              | N                       | 1.000, 1.000                                |
| 6                | A                          | I                       | 0.749, 0.749                              | D                       | 0.999, 0.999                                |
| 7                |                            | I                       | 0.748, 0.748                              | D                       | 1.000, 1.000                                |
| 8                |                            | I                       | 0.981, 0.981                              | D                       | 1.000, 1.000                                |

|    |   |   |              |   |              |
|----|---|---|--------------|---|--------------|
| 9  |   | I | 0.981, 0.981 | D | 1.000, 1.000 |
| 10 |   | I | 0.959, 0.959 | D | 1.000, 1.000 |
| 11 | B | V | 0.998, 0.998 | D | 1.000, 1.000 |
| 12 |   | V | 1.000, 1.000 | D | 1.000, 1.000 |
| 13 |   | V | 1.000, 1.000 | D | 1.000, 1.000 |
| 14 |   | V | 1.000, 1.000 | D | 0.996, 1.000 |
| 15 | C | V | 1.000, 1.000 | D | 0.999, 1.000 |
| 16 |   | V | 0.999, 1.000 | D | 0.997, 1.000 |
| 17 |   | V | 1.000, 1.000 | D | 0.943, 1.000 |
| 18 |   | V | 1.000, 1.000 | D | 1.000, 1.000 |
| 19 |   | V | 1.000, 1.000 | D | 1.000, 1.000 |
| 20 |   | V | 1.000, 1.000 | D | 1.000, 1.000 |
| 21 |   | V | 1.000, 1.000 | D | 1.000, 1.000 |
| 26 |   | V | 1.000, 1.000 | D | 1.000, 1.000 |
| 30 |   | V | 0.997, 1.000 | D | 1.000, 1.000 |
| 31 |   | V | 0.999, 1.000 | D | 1.000, 1.000 |
| 32 |   | V | 1.000, 1.000 | D | 1.000, 1.000 |
| 36 |   | V | 0.963, 1.000 | D | 1.000, 1.000 |
| 37 |   | V | 0.998, 1.000 | D | 1.000, 1.000 |
| 41 |   | V | 1.000, 1.000 | D | 1.000, 1.000 |
| 42 |   | V | 1.000, 1.000 | D | 1.000, 1.000 |
| 43 |   | V | 1.000, 1.000 | D | 1.000, 1.000 |
| 44 |   | V | 1.000, 1.000 | D | 1.000, 1.000 |
| 47 |   | V | 1.000, 1.000 | D | 1.000, 1.000 |
| 52 |   | V | 1.000, 1.000 | D | 0.985, 1.000 |
| 53 |   | V | 1.000, 1.000 | D | 0.985, 1.000 |
| 57 |   | V | 1.000, 1.000 | D | 1.000, 1.000 |
| 58 |   | V | 1.000, 1.000 | D | 1.000, 1.000 |
| 59 |   | V | 1.000, 1.000 | D | 1.000, 1.000 |
| 60 |   | V | 1.000, 1.000 | D | 1.000, 1.000 |
| 64 |   | V | 1.000, 1.000 | D | 0.976, 1.000 |
| 68 |   | V | 1.000, 1.000 | D | 1.000, 1.000 |
| 71 |   | V | 1.000, 1.000 | D | 1.000, 1.000 |
| 72 | E | V | 1.000, 1.000 | D | 0.999, 1.000 |
| 73 |   | V | 0.990, 1.000 | D | 0.988, 1.000 |

|     |   |   |              |   |              |
|-----|---|---|--------------|---|--------------|
| 74  | D | V | 1.000, 1.000 | D | 1.000, 1.000 |
| 75  |   | V | 1.000, 1.000 | D | 1.000, 1.000 |
| 76  |   | V | 1.000, 1.000 | D | 1.000, 1.000 |
| 80  |   | V | 1.000, 1.000 | D | 1.000, 1.000 |
| 84  |   | V | 1.000, 1.000 | D | 0.999, 1.000 |
| 85  |   | V | 1.000, 1.000 | D | 0.998, 1.000 |
| 86  |   | V | 1.000, 1.000 | D | 0.998, 1.000 |
| 87  |   | V | 1.000, 1.000 | D | 0.998, 1.000 |
| 88  |   | V | 1.000, 1.000 | D | 0.999, 1.000 |
| 89  |   | V | 1.000, 1.000 | D | 1.000, 1.000 |
| 90  |   | V | 1.000, 1.000 | D | 1.000, 1.000 |
| 96  |   | V | 1.000, 1.000 | D | 1.000, 1.000 |
| 97  |   | V | 1.000, 1.000 | D | 1.000, 1.000 |
| 101 |   | V | 1.000, 1.000 | D | 0.964, 1.000 |
| 104 |   | V | 1.000, 1.000 | D | 0.961, 1.000 |
| 108 |   | I | 0.999, 0.999 | D | 0.998, 1.000 |
| 111 |   | I | 0.975, 1.000 | D | 0.996, 1.000 |
| 112 |   | I | 1.000, 1.000 | D | 0.986, 1.000 |
| 113 |   | I | 1.000, 1.000 | D | 1.000, 1.000 |
| 114 |   | I | 1.000, 1.000 | D | 1.000, 1.000 |
| 120 | L | I | 0.999, 0.999 | D | 1.000, 1.000 |
| 121 |   | I | 0.999, 1.000 | D | 0.998, 1.000 |
| 122 |   | I | 1.000, 1.000 | D | 1.000, 1.000 |
| 123 |   | I | 1.000, 1.000 | D | 0.997, 0.997 |
| 124 |   | I | 1.000, 1.000 | D | 1.000, 1.000 |
| 125 |   | I | 1.000, 1.000 | D | 1.000, 1.000 |
| 126 |   | I | 1.000, 1.000 | D | 1.000, 1.000 |
| 127 |   | I | 0.999, 1.000 | D | 1.000, 1.000 |
| 128 |   | I | 1.000, 1.000 | D | 0.996, 0.996 |
| 129 | J | I | 1.000, 1.000 | N | 0.999, 0.999 |
| 130 |   | I | 1.000, 1.000 | N | 1.000, 1.000 |
| 131 |   | I | 1.000, 1.000 | N | 1.000, 1.000 |
| 132 |   | I | 1.000, 1.000 | N | 1.000, 1.000 |
| 133 |   | I | 1.000, 1.000 | N | 1.000, 1.000 |
| 134 |   | I | 1.000, 1.000 | N | 1.000, 1.000 |



|     |   |   |              |   |              |
|-----|---|---|--------------|---|--------------|
| 135 |   | I | 1.000, 1.000 | N | 1.000, 1.000 |
| 136 |   | I | 1.000, 1.000 | N | 1.000, 1.000 |
| 137 |   | I | 1.000, 1.000 | N | 1.000, 1.000 |
| 143 |   | I | 1.000, 1.000 | N | 1.000, 1.000 |
| 144 |   | I | 1.000, 1.000 | N | 1.000, 1.000 |
| 145 |   | I | 1.000, 1.000 | N | 1.000, 1.000 |
| 150 |   | I | 1.000, 1.000 | N | 1.000, 1.000 |
| 153 |   | I | 1.000, 1.000 | N | 1.000, 1.000 |
| 156 |   | I | 1.000, 1.000 | N | 1.000, 1.000 |
| 157 |   | I | 1.000, 1.000 | N | 1.000, 1.000 |
| 158 |   | I | 1.000, 1.000 | N | 1.000, 1.000 |
| 159 |   | I | 0.997, 0.998 | N | 0.998, 0.998 |
| 163 |   | I | 1.000, 1.000 | N | 1.000, 1.000 |
| 166 |   | I | 1.000, 1.000 | N | 0.998, 0.998 |
| 169 |   | I | 1.000, 1.000 | N | 1.000, 1.000 |
| 170 |   | I | 1.000, 1.000 | N | 1.000, 1.000 |
| 176 |   | I | 1.000, 1.000 | D | 1.000, 1.000 |
| 179 |   | I | 1.000, 1.000 | D | 1.000, 1.000 |
| 180 |   | I | 1.000, 1.000 | D | 1.000, 1.000 |
| 181 |   | I | 1.000, 1.000 | D | 1.000, 1.000 |
| 184 |   | I | 1.000, 1.000 | D | 1.000, 1.000 |
| 187 |   | I | 1.000, 1.000 | D | 1.000, 1.000 |
| 189 |   | I | 1.000, 1.000 | D | 1.000, 1.000 |
| 192 |   | I | 1.000, 1.000 | D | 1.000, 1.000 |
| 194 |   | I | 1.000, 1.000 | D | 1.000, 1.000 |
| 195 |   | I | 1.000, 1.000 | D | 1.000, 1.000 |
| 199 | I | I | 1.000, 1.000 | N | 0.990, 0.991 |
| 200 |   | I | 1.000, 1.000 | N | 1.000, 1.000 |
| 201 |   | I | 1.000, 1.000 | N | 1.000, 1.000 |
| 202 |   | I | 1.000, 1.000 | N | 1.000, 1.000 |
| 210 |   | I | 1.000, 1.000 | D | 1.000, 1.000 |
| 211 |   | I | 1.000, 1.000 | D | 1.000, 1.000 |
| 215 | F | V | 0.951, 0.979 | D | 1.000, 1.000 |
| 216 |   | V | 0.967, 0.999 | D | 1.000, 1.000 |
| 217 |   | V | 0.997, 1.000 | D | 1.000, 1.000 |

|     |   |   |              |   |              |
|-----|---|---|--------------|---|--------------|
| 218 |   | V | 1.000, 1.000 | D | 1.000, 1.000 |
| 219 |   | V | 1.000, 1.000 | D | 1.000, 1.000 |
| 226 | B | I | 0.684, 0.684 | D | 1.000, 1.000 |
| 228 |   | I | 0.686, 0.686 | D | 0.999, 1.000 |
| 229 | K | I | 1.000, 1.000 | D | 1.000, 1.000 |
| 233 |   | I | 1.000, 1.000 | N | 0.999, 1.000 |
| 234 | H | I | 1.000, 1.000 | N | 1.000, 1.000 |
| 235 |   | I | 1.000, 1.000 | N | 1.000, 1.000 |
| 236 |   | I | 1.000, 1.000 | N | 1.000, 1.000 |
| 237 |   | I | 1.000, 1.000 | N | 1.000, 1.000 |
| 238 |   | I | 1.000, 1.000 | N | 1.000, 1.000 |
| 239 |   | I | 1.000, 1.000 | N | 1.000, 1.000 |
| 240 |   | I | 1.000, 1.000 | N | 1.000, 1.000 |
| 241 |   | I | 1.000, 1.000 | N | 1.000, 1.000 |
| 242 |   | I | 1.000, 1.000 | N | 1.000, 1.000 |
| 243 |   | I | 1.000, 1.000 | N | 1.000, 1.000 |
| 244 |   | I | 1.000, 1.000 | N | 1.000, 1.000 |
| 245 |   | I | 1.000, 1.000 | N | 1.000, 1.000 |
| 246 |   | I | 1.000, 1.000 | N | 1.000, 1.000 |
| 247 |   | I | 1.000, 1.000 | N | 1.000, 1.000 |
| 248 |   | I | 1.000, 1.000 | N | 1.000, 1.000 |
| 249 |   | I | 1.000, 1.000 | N | 1.000, 1.000 |
| 253 |   | I | 1.000, 1.000 | N | 1.000, 1.000 |
| 254 |   | I | 1.000, 1.000 | N | 1.000, 1.000 |
| 260 |   | I | 1.000, 1.000 | N | 1.000, 1.000 |
| 261 |   | I | 1.000, 1.000 | N | 1.000, 1.000 |
| 265 |   | I | 1.000, 1.000 | N | 1.000, 1.000 |
| 266 |   | I | 1.000, 1.000 | N | 1.000, 1.000 |
| 267 |   | I | 1.000, 1.000 | N | 1.000, 1.000 |
| 268 |   | I | 1.000, 1.000 | N | 1.000, 1.000 |
| 269 |   | I | 1.000, 1.000 | N | 1.000, 1.000 |
| 276 |   | I | 1.000, 1.000 | N | 1.000, 1.000 |
| 278 |   | I | 1.000, 1.000 | N | 1.000, 1.000 |
| 281 |   | I | 1.000, 1.000 | N | 1.000, 1.000 |
| 282 |   | I | 1.000, 1.000 | N | 1.000, 1.000 |

|     |   |              |   |              |
|-----|---|--------------|---|--------------|
| 283 | I | 1.000, 1.000 | N | 1.000, 1.000 |
| 284 | I | 1.000, 1.000 | N | 1.000, 1.000 |
| 290 | I | 1.000, 1.000 | N | 1.000, 1.000 |
| 293 | I | 1.000, 1.000 | N | 1.000, 1.000 |
| 294 | I | 1.000, 1.000 | N | 1.000, 1.000 |
| 295 | I | 1.000, 1.000 | N | 1.000, 1.000 |
| 296 | I | 1.000, 1.000 | N | 1.000, 1.000 |
| 297 | I | 1.000, 1.000 | N | 1.000, 1.000 |
| 298 | I | 1.000, 1.000 | N | 1.000, 1.000 |
| 299 | I | 1.000, 1.000 | N | 1.000, 1.000 |
| 300 | I | 1.000, 1.000 | N | 1.000, 1.000 |
| 301 | I | 1.000, 1.000 | N | 1.000, 1.000 |
| 302 | I | 1.000, 1.000 | N | 1.000, 1.000 |
| 303 | I | 1.000, 1.000 | N | 1.000, 1.000 |
| 311 | I | 1.000, 1.000 | N | 1.000, 1.000 |
| 312 | I | 1.000, 1.000 | N | 1.000, 1.000 |
| 315 | I | 1.000, 1.000 | N | 1.000, 1.000 |
| 318 | I | 1.000, 1.000 | N | 1.000, 1.000 |
| 319 | I | 1.000, 1.000 | N | 1.000, 1.000 |
| 320 | I | 1.000, 1.000 | N | 1.000, 1.000 |
| 321 | I | 1.000, 1.000 | N | 1.000, 1.000 |
| 326 | I | 1.000, 1.000 | N | 1.000, 1.000 |
| 330 | I | 1.000, 1.000 | N | 1.000, 1.000 |
| 331 | I | 1.000, 1.000 | N | 1.000, 1.000 |
| 335 | I | 1.000, 1.000 | N | 1.000, 1.000 |
| 336 | I | 1.000, 1.000 | N | 1.000, 1.000 |
| 337 | I | 1.000, 1.000 | N | 1.000, 1.000 |
| 341 | I | 0.976, 1.000 | N | 1.000, 1.000 |
| 344 | I | 1.000, 1.000 | N | 1.000, 1.000 |
| 345 | I | 1.000, 1.000 | N | 1.000, 1.000 |
| 346 | I | 1.000, 1.000 | N | 1.000, 1.000 |
| 347 | I | 0.981, 1.000 | N | 1.000, 1.000 |
| 348 | I | 0.999, 1.000 | N | 1.000, 1.000 |
| 349 | I | 1.000, 1.000 | N | 1.000, 1.000 |
| 350 | I | 1.000, 1.000 | N | 1.000, 1.000 |

|     |   |              |   |              |
|-----|---|--------------|---|--------------|
| 351 | I | 1.000, 1.000 | N | 1.000, 1.000 |
| 352 | I | 1.000, 1.000 | N | 1.000, 1.000 |
| 353 | I | 1.000, 1.000 | N | 1.000, 1.000 |
| 354 | I | 1.000, 1.000 | N | 1.000, 1.000 |
| 355 | I | 1.000, 1.000 | N | 1.000, 1.000 |
| 356 | I | 1.000, 1.000 | N | 1.000, 1.000 |
| 361 | I | 1.000, 1.000 | N | 1.000, 1.000 |
| 362 | I | 1.000, 1.000 | N | 1.000, 1.000 |
| 363 | I | 1.000, 1.000 | N | 1.000, 1.000 |
| 368 | I | 1.000, 1.000 | N | 1.000, 1.000 |
| 369 | I | 1.000, 1.000 | N | 1.000, 1.000 |
| 373 | I | 1.000, 1.000 | N | 1.000, 1.000 |
| 374 | I | 1.000, 1.000 | N | 1.000, 1.000 |
| 375 | I | 1.000, 1.000 | N | 1.000, 1.000 |
| 379 | I | 1.000, 1.000 | N | 1.000, 1.000 |
| 382 | I | 1.000, 1.000 | N | 1.000, 1.000 |
| 383 | I | 1.000, 1.000 | N | 1.000, 1.000 |
| 384 | I | 1.000, 1.000 | N | 1.000, 1.000 |
| 387 | I | 1.000, 1.000 | N | 1.000, 1.000 |
| 390 | I | 1.000, 1.000 | N | 1.000, 1.000 |
| 391 | I | 1.000, 1.000 | N | 1.000, 1.000 |
| 395 | I | 1.000, 1.000 | N | 1.000, 1.000 |
| 396 | I | 1.000, 1.000 | N | 1.000, 1.000 |
| 397 | I | 1.000, 1.000 | N | 1.000, 1.000 |
| 398 | I | 1.000, 1.000 | N | 1.000, 1.000 |
| 403 | I | 1.000, 1.000 | N | 1.000, 1.000 |
| 404 | I | 1.000, 1.000 | N | 0.997, 1.000 |
| 410 | I | 1.000, 1.000 | N | 1.000, 1.000 |
| 411 | I | 1.000, 1.000 | N | 1.000, 1.000 |
| 415 | I | 1.000, 1.000 | N | 1.000, 1.000 |
| 416 | I | 1.000, 1.000 | N | 1.000, 1.000 |
| 417 | I | 1.000, 1.000 | N | 1.000, 1.000 |
| 418 | I | 1.000, 1.000 | N | 1.000, 1.000 |
| 419 | I | 1.000, 1.000 | N | 1.000, 1.000 |
| 422 | I | 1.000, 1.000 | N | 1.000, 1.000 |

|     |   |              |   |              |
|-----|---|--------------|---|--------------|
| 429 | I | 1.000, 1.000 | N | 1.000, 1.000 |
| 430 | I | 1.000, 1.000 | N | 1.000, 1.000 |
| 431 | I | 1.000, 1.000 | N | 1.000, 1.000 |
| 432 | I | 1.000, 1.000 | N | 1.000, 1.000 |
| 433 | I | 1.000, 1.000 | N | 1.000, 1.000 |
| 435 | I | 1.000, 1.000 | N | 1.000, 1.000 |
| 438 | I | 1.000, 1.000 | N | 1.000, 1.000 |
| 441 | I | 1.000, 1.000 | N | 1.000, 1.000 |
| 445 | I | 0.992, 1.000 | N | 1.000, 1.000 |
| 446 | I | 0.995, 1.000 | N | 0.990, 1.000 |
| 450 | I | 1.000, 1.000 | N | 1.000, 1.000 |
| 453 | I | 1.000, 1.000 | N | 1.000, 1.000 |
| 454 | I | 1.000, 1.000 | N | 1.000, 1.000 |
| 458 | I | 0.999, 1.000 | N | 1.000, 1.000 |
| 459 | M | 0.999, 0.999 | N | 1.000, 1.000 |
| 460 | M | 1.000, 1.000 | N | 1.000, 1.000 |
| 465 | I | 1.000, 1.000 | N | 0.991, 1.000 |
| 466 | I | 1.000, 1.000 | N | 0.991, 1.000 |
| 467 | I | 1.000, 1.000 | N | 0.991, 1.000 |
| 468 | I | 1.000, 1.000 | N | 0.952, 1.000 |
| 469 | I | 1.000, 1.000 | N | 1.000, 1.000 |
| 476 | I | 1.000, 1.000 | N | 1.000, 1.000 |
| 477 | I | 1.000, 1.000 | N | 1.000, 1.000 |
| 478 | I | 1.000, 1.000 | N | 1.000, 1.000 |
| 482 | I | 1.000, 1.000 | N | 1.000, 1.000 |
| 485 | I | 1.000, 1.000 | N | 1.000, 1.000 |
| 486 | I | 1.000, 1.000 | N | 1.000, 1.000 |
| 487 | I | 1.000, 1.000 | N | 1.000, 1.000 |
| 488 | I | 1.000, 1.000 | N | 1.000, 1.000 |
| 489 | I | 1.000, 1.000 | N | 1.000, 1.000 |
| 490 | I | 1.000, 1.000 | N | 1.000, 1.000 |
| 491 | I | 1.000, 1.000 | N | 1.000, 1.000 |
| 492 | I | 1.000, 1.000 | N | 1.000, 1.000 |
| 493 | I | 1.000, 1.000 | N | 1.000, 1.000 |
| 494 | I | 1.000, 1.000 | N | 1.000, 1.000 |

|     |   |              |   |              |
|-----|---|--------------|---|--------------|
| 495 | I | 1.000, 1.000 | N | 1.000, 1.000 |
| 496 | I | 1.000, 1.000 | N | 1.000, 1.000 |
| 497 | I | 1.000, 1.000 | N | 1.000, 1.000 |
| 504 | I | 1.000, 1.000 | N | 1.000, 1.000 |
| 505 | I | 1.000, 1.000 | N | 1.000, 1.000 |
| 509 | I | 1.000, 1.000 | N | 1.000, 1.000 |
| 512 | I | 1.000, 1.000 | N | 0.921, 1.000 |
| 516 | I | 1.000, 1.000 | N | 1.000, 1.000 |
| 520 | I | 1.000, 1.000 | N | 1.000, 1.000 |
| 521 | I | 1.000, 1.000 | N | 1.000, 1.000 |
| 522 | I | 1.000, 1.000 | N | 1.000, 1.000 |
| 526 | I | 1.000, 1.000 | N | 1.000, 1.000 |
| 529 | I | 1.000, 1.000 | N | 1.000, 1.000 |
| 530 | I | 1.000, 1.000 | N | 1.000, 1.000 |
| 533 | I | 1.000, 1.000 | N | 0.870, 1.000 |
| 534 | I | 1.000, 1.000 | N | 1.000, 1.000 |
| 538 | I | 1.000, 1.000 | N | 1.000, 1.000 |
| 539 | I | 1.000, 1.000 | N | 1.000, 1.000 |
| 540 | I | 1.000, 1.000 | N | 1.000, 1.000 |
| 541 | I | 1.000, 1.000 | N | 1.000, 1.000 |

**Table S7.** Reconstructions of the ancestral I269VXXXN273D amino acid motifs (joint and marginal results identical) on all branches of the reduced dataset topology tree (Fig. 4). The node numbers are in the labeled tree in Fig. S8, and the lettered branch labels in Figs. 3 and 4. The lower and upper end of the posterior probability of the marginal reconstruction are reported.

| node # | Branch Label | Pos. 269 reconstruction | Pos. 269 posterior probability (marginal reconstruction) | Pos. 273 reconstruction | Pos. 273 posterior probabilities (marginal reconstruction) |
|--------|--------------|-------------------------|----------------------------------------------------------|-------------------------|------------------------------------------------------------|
| root   |              | I                       | 0.940, 0.999                                             | N                       | 0.991, 0.999                                               |
| 1      |              | I                       | 0.843, 1.000                                             | N                       | 0.997, 1.000                                               |
| 2      |              | I                       | 1.000, 1.000                                             | N                       | 1.000, 1.000                                               |
| 3      |              | I                       | 1.000, 1.000                                             | N                       | 1.000, 1.000                                               |
| 4      |              | I                       | 1.000, 1.000                                             | N                       | 1.000, 1.000                                               |
| 5      |              | I                       | 1.000, 1.000                                             | N                       | 1.000, 1.000                                               |
| 6      |              | I                       | 1.000, 1.000                                             | N                       | 0.995, 0.999                                               |
| 7      | A            | I                       | 0.977, 0.977                                             | D                       | 0.999, 0.999                                               |

|    |   |   |              |   |              |
|----|---|---|--------------|---|--------------|
| 8  |   | I | 0.998, 0.998 | D | 1.000, 1.000 |
| 9  |   | I | 0.998, 0.998 | D | 0.999, 1.000 |
| 10 |   | I | 0.968, 0.968 | D | 1.000, 1.000 |
| 11 | B | V | 0.997, 0.997 | D | 1.000, 1.000 |
| 12 |   | V | 1.000, 1.000 | D | 1.000, 1.000 |
| 13 |   | V | 1.000, 1.000 | D | 1.000, 1.000 |
| 14 |   | V | 1.000, 1.000 | D | 0.995, 1.000 |
| 15 | C | V | 1.000, 1.000 | D | 0.999, 1.000 |
| 16 |   | V | 0.999, 1.000 | D | 0.997, 1.000 |
| 17 |   | V | 1.000, 1.000 | D | 0.943, 1.000 |
| 18 |   | V | 1.000, 1.000 | D | 1.000, 1.000 |
| 19 |   | V | 1.000, 1.000 | D | 1.000, 1.000 |
| 20 |   | V | 1.000, 1.000 | D | 1.000, 1.000 |
| 21 |   | V | 1.000, 1.000 | D | 1.000, 1.000 |
| 26 |   | V | 1.000, 1.000 | D | 1.000, 1.000 |
| 30 |   | V | 0.997, 1.000 | D | 1.000, 1.000 |
| 31 |   | V | 0.999, 1.000 | D | 1.000, 1.000 |
| 32 |   | V | 1.000, 1.000 | D | 1.000, 1.000 |
| 36 |   | V | 0.963, 1.000 | D | 1.000, 1.000 |
| 37 |   | V | 0.998, 1.000 | D | 1.000, 1.000 |
| 41 |   | V | 1.000, 1.000 | D | 1.000, 1.000 |
| 42 |   | V | 1.000, 1.000 | D | 1.000, 1.000 |
| 43 |   | V | 1.000, 1.000 | D | 1.000, 1.000 |
| 44 |   | V | 1.000, 1.000 | D | 1.000, 1.000 |
| 47 |   | V | 1.000, 1.000 | D | 1.000, 1.000 |
| 52 |   | V | 1.000, 1.000 | D | 0.981, 1.000 |
| 53 |   | V | 1.000, 1.000 | D | 0.986, 1.000 |
| 57 |   | V | 1.000, 1.000 | D | 1.000, 1.000 |
| 58 |   | V | 1.000, 1.000 | D | 1.000, 1.000 |
| 59 |   | V | 1.000, 1.000 | D | 1.000, 1.000 |
| 60 |   | V | 1.000, 1.000 | D | 0.975, 1.000 |
| 64 |   | V | 1.000, 1.000 | D | 1.000, 1.000 |
| 68 |   | V | 1.000, 1.000 | D | 1.000, 1.000 |

|     |   |   |              |   |              |
|-----|---|---|--------------|---|--------------|
| 71  |   | V | 1.000, 1.000 | D | 0.999, 1.000 |
| 72  | E | V | 1.000, 1.000 | D | 0.999, 1.000 |
| 73  |   | V | 1.000, 1.000 | D | 0.999, 1.000 |
| 74  |   | V | 1.000, 1.000 | D | 0.999, 1.000 |
| 75  |   | V | 1.000, 1.000 | D | 0.998, 1.000 |
| 76  |   | V | 1.000, 1.000 | D | 0.998, 1.000 |
| 77  |   | V | 1.000, 1.000 | D | 0.994, 1.000 |
| 78  |   | V | 1.000, 1.000 | D | 0.998, 1.000 |
| 79  |   | V | 1.000, 1.000 | D | 1.000, 1.000 |
| 80  |   | V | 1.000, 1.000 | D | 1.000, 1.000 |
| 86  |   | V | 1.000, 1.000 | D | 1.000, 1.000 |
| 87  |   | V | 1.000, 1.000 | D | 1.000, 1.000 |
| 91  |   | V | 1.000, 1.000 | D | 0.964, 1.000 |
| 94  |   | V | 1.000, 1.000 | D | 0.960, 1.000 |
| 98  | D | V | 1.000, 1.000 | D | 1.000, 1.000 |
| 99  |   | V | 1.000, 1.000 | D | 1.000, 1.000 |
| 100 |   | V | 1.000, 1.000 | D | 1.000, 1.000 |
| 104 |   | V | 1.000, 1.000 | D | 1.000, 1.000 |
| 108 |   | I | 0.999, 0.999 | D | 0.998, 1.000 |
| 111 |   | I | 1.000, 1.000 | D | 0.898, 1.000 |
| 112 |   | I | 0.999, 1.000 | D | 0.994, 1.000 |
| 113 |   | I | 1.000, 1.000 | D | 1.000, 1.000 |
| 114 |   | I | 1.000, 1.000 | D | 1.000, 1.000 |
| 120 | L | I | 1.000, 1.000 | D | 1.000, 1.000 |
| 121 |   | I | 0.999, 1.000 | D | 0.998, 1.000 |
| 122 |   | I | 1.000, 1.000 | D | 1.000, 1.000 |
| 123 |   | I | 1.000, 1.000 | D | 0.998, 0.998 |
| 124 |   | I | 1.000, 1.000 | D | 1.000, 1.000 |
| 125 |   | I | 1.000, 1.000 | D | 1.000, 1.000 |
| 126 |   | I | 1.000, 1.000 | D | 1.000, 1.000 |
| 127 |   | I | 1.000, 1.000 | D | 1.000, 1.000 |
| 128 |   | I | 1.000, 1.000 | D | 0.998, 0.998 |
| 129 |   | I | 1.000, 1.000 | D | 0.998, 0.998 |



|     |   |   |              |   |              |
|-----|---|---|--------------|---|--------------|
| 130 |   | I | 1.000, 1.000 | D | 0.994, 0.994 |
| 131 | J | I | 1.000, 1.000 | N | 0.999, 0.999 |
| 132 |   | I | 1.000, 1.000 | N | 1.000, 1.000 |
| 133 |   | I | 1.000, 1.000 | N | 1.000, 1.000 |
| 134 |   | I | 1.000, 1.000 | N | 1.000, 1.000 |
| 135 |   | I | 1.000, 1.000 | N | 1.000, 1.000 |
| 136 |   | I | 1.000, 1.000 | N | 1.000, 1.000 |
| 137 |   | I | 1.000, 1.000 | N | 1.000, 1.000 |
| 138 |   | I | 1.000, 1.000 | N | 1.000, 1.000 |
| 139 |   | I | 1.000, 1.000 | N | 1.000, 1.000 |
| 145 |   | I | 1.000, 1.000 | N | 1.000, 1.000 |
| 146 |   | I | 1.000, 1.000 | N | 1.000, 1.000 |
| 147 |   | I | 1.000, 1.000 | N | 1.000, 1.000 |
| 152 |   | I | 1.000, 1.000 | N | 1.000, 1.000 |
| 155 |   | I | 1.000, 1.000 | N | 1.000, 1.000 |
| 158 |   | I | 1.000, 1.000 | N | 1.000, 1.000 |
| 159 |   | I | 1.000, 1.000 | N | 1.000, 1.000 |
| 160 |   | I | 1.000, 1.000 | N | 1.000, 1.000 |
| 161 |   | I | 0.997, 0.998 | N | 0.998, 0.998 |
| 165 |   | I | 1.000, 1.000 | N | 1.000, 1.000 |
| 168 |   | I | 1.000, 1.000 | N | 0.998, 0.998 |
| 171 |   | I | 1.000, 1.000 | N | 1.000, 1.000 |
| 172 |   | I | 1.000, 1.000 | N | 1.000, 1.000 |
| 179 |   | I | 1.000, 1.000 | D | 1.000, 1.000 |
| 182 |   | I | 1.000, 1.000 | D | 1.000, 1.000 |
| 183 |   | I | 1.000, 1.000 | D | 1.000, 1.000 |
| 184 |   | I | 1.000, 1.000 | D | 1.000, 1.000 |
| 187 |   | I | 1.000, 1.000 | D | 1.000, 1.000 |
| 190 |   | I | 1.000, 1.000 | D | 1.000, 1.000 |
| 193 |   | I | 1.000, 1.000 | D | 1.000, 1.000 |
| 194 |   | I | 1.000, 1.000 | D | 1.000, 1.000 |
| 199 | I | I | 1.000, 1.000 | N | 0.990, 0.991 |
| 200 |   | I | 1.000, 1.000 | N | 1.000, 1.000 |

|     |   |   |              |   |              |
|-----|---|---|--------------|---|--------------|
| 201 |   | I | 1.000, 1.000 | N | 1.000, 1.000 |
| 202 |   | I | 1.000, 1.000 | N | 1.000, 1.000 |
| 210 |   | I | 1.000, 1.000 | D | 1.000, 1.000 |
| 211 |   | I | 1.000, 1.000 | D | 1.000, 1.000 |
| 215 | G | V | 0.934, 0.934 | D | 1.000, 1.000 |
| 216 | F | V | 0.964, 0.998 | D | 1.000, 1.000 |
| 217 |   | V | 0.962, 1.000 | D | 1.000, 1.000 |
| 218 |   | V | 0.997, 1.000 | D | 1.000, 1.000 |
| 219 |   | V | 1.000, 1.000 | D | 1.000, 1.000 |
| 220 |   | V | 1.000, 1.000 | D | 1.000, 1.000 |
| 227 |   | V | 0.940, 0.940 | D | 1.000, 1.000 |
| 228 |   | V | 0.914, 0.915 | D | 0.999, 1.000 |
| 229 | K | I | 1.000, 1.000 | D | 1.000, 1.000 |
| 234 |   | I | 1.000, 1.000 | N | 0.893, 1.000 |
| 235 |   | I | 1.000, 1.000 | N | 0.889, 1.000 |
| 236 |   | I | 1.000, 1.000 | N | 0.889, 1.000 |
| 237 |   | I | 1.000, 1.000 | N | 0.998, 1.000 |
| 240 |   | I | 1.000, 1.000 | N | 0.889, 1.000 |
| 245 | H | I | 1.000, 1.000 | N | 1.000, 1.000 |
| 246 |   | I | 1.000, 1.000 | N | 1.000, 1.000 |
| 247 |   | I | 1.000, 1.000 | N | 1.000, 1.000 |
| 248 |   | I | 1.000, 1.000 | N | 1.000, 1.000 |
| 249 |   | I | 1.000, 1.000 | N | 1.000, 1.000 |
| 250 |   | I | 1.000, 1.000 | N | 1.000, 1.000 |
| 251 |   | I | 1.000, 1.000 | N | 1.000, 1.000 |
| 252 |   | I | 1.000, 1.000 | N | 1.000, 1.000 |
| 253 |   | I | 0.982, 1.000 | N | 1.000, 1.000 |
| 254 |   | I | 0.999, 1.000 | N | 1.000, 1.000 |
| 255 |   | I | 1.000, 1.000 | N | 1.000, 1.000 |
| 256 |   | I | 1.000, 1.000 | N | 1.000, 1.000 |
| 257 |   | I | 1.000, 1.000 | N | 1.000, 1.000 |
| 258 |   | I | 1.000, 1.000 | N | 1.000, 1.000 |
| 259 |   | I | 1.000, 1.000 | N | 1.000, 1.000 |

|     |   |              |   |              |
|-----|---|--------------|---|--------------|
| 260 | I | 1.000, 1.000 | N | 1.000, 1.000 |
| 261 | I | 1.000, 1.000 | N | 1.000, 1.000 |
| 262 | I | 1.000, 1.000 | N | 1.000, 1.000 |
| 267 | I | 1.000, 1.000 | N | 1.000, 1.000 |
| 268 | I | 1.000, 1.000 | N | 1.000, 1.000 |
| 269 | I | 1.000, 1.000 | N | 1.000, 1.000 |
| 274 | I | 1.000, 1.000 | N | 1.000, 1.000 |
| 275 | I | 1.000, 1.000 | N | 1.000, 1.000 |
| 279 | I | 1.000, 1.000 | N | 1.000, 1.000 |
| 280 | I | 1.000, 1.000 | N | 1.000, 1.000 |
| 281 | I | 1.000, 1.000 | N | 1.000, 1.000 |
| 282 | I | 1.000, 1.000 | N | 1.000, 1.000 |
| 288 | I | 1.000, 1.000 | N | 1.000, 1.000 |
| 289 | I | 1.000, 1.000 | N | 1.000, 1.000 |
| 290 | I | 1.000, 1.000 | N | 1.000, 1.000 |
| 293 | I | 1.000, 1.000 | N | 1.000, 1.000 |
| 296 | I | 1.000, 1.000 | N | 1.000, 1.000 |
| 297 | I | 1.000, 1.000 | N | 1.000, 1.000 |
| 301 | I | 1.000, 1.000 | N | 1.000, 1.000 |
| 302 | I | 1.000, 1.000 | N | 1.000, 1.000 |
| 303 | I | 1.000, 1.000 | N | 1.000, 1.000 |
| 304 | I | 1.000, 1.000 | N | 1.000, 1.000 |
| 309 | I | 1.000, 1.000 | N | 1.000, 1.000 |
| 310 | I | 1.000, 1.000 | N | 0.997, 1.000 |
| 316 | I | 1.000, 1.000 | N | 1.000, 1.000 |
| 317 | I | 1.000, 1.000 | N | 1.000, 1.000 |
| 321 | I | 1.000, 1.000 | N | 1.000, 1.000 |
| 322 | I | 1.000, 1.000 | N | 1.000, 1.000 |
| 323 | I | 1.000, 1.000 | N | 1.000, 1.000 |
| 324 | I | 1.000, 1.000 | N | 1.000, 1.000 |
| 325 | I | 1.000, 1.000 | N | 1.000, 1.000 |
| 328 | I | 1.000, 1.000 | N | 1.000, 1.000 |
| 334 | I | 1.000, 1.000 | N | 1.000, 1.000 |

|     |   |              |   |              |
|-----|---|--------------|---|--------------|
| 335 | I | 1.000, 1.000 | N | 1.000, 1.000 |
| 336 | I | 1.000, 1.000 | N | 1.000, 1.000 |
| 337 | I | 1.000, 1.000 | N | 1.000, 1.000 |
| 338 | I | 1.000, 1.000 | N | 1.000, 1.000 |
| 339 | I | 1.000, 1.000 | N | 1.000, 1.000 |
| 340 | I | 1.000, 1.000 | N | 1.000, 1.000 |
| 341 | I | 1.000, 1.000 | N | 1.000, 1.000 |
| 342 | I | 1.000, 1.000 | N | 1.000, 1.000 |
| 343 | I | 1.000, 1.000 | N | 1.000, 1.000 |
| 344 | I | 1.000, 1.000 | N | 1.000, 1.000 |
| 352 | I | 1.000, 1.000 | N | 1.000, 1.000 |
| 353 | I | 1.000, 1.000 | N | 1.000, 1.000 |
| 356 | I | 1.000, 1.000 | N | 1.000, 1.000 |
| 359 | I | 1.000, 1.000 | N | 1.000, 1.000 |
| 360 | I | 1.000, 1.000 | N | 1.000, 1.000 |
| 361 | I | 1.000, 1.000 | N | 1.000, 1.000 |
| 362 | I | 1.000, 1.000 | N | 1.000, 1.000 |
| 367 | I | 1.000, 1.000 | N | 1.000, 1.000 |
| 371 | I | 1.000, 1.000 | N | 1.000, 1.000 |
| 372 | I | 1.000, 1.000 | N | 1.000, 1.000 |
| 376 | I | 1.000, 1.000 | N | 1.000, 1.000 |
| 377 | I | 1.000, 1.000 | N | 1.000, 1.000 |
| 378 | I | 1.000, 1.000 | N | 1.000, 1.000 |
| 382 | I | 0.977, 1.000 | N | 1.000, 1.000 |
| 385 | I | 1.000, 1.000 | N | 1.000, 1.000 |
| 386 | I | 1.000, 1.000 | N | 1.000, 1.000 |
| 387 | I | 1.000, 1.000 | N | 1.000, 1.000 |
| 388 | I | 1.000, 1.000 | N | 1.000, 1.000 |
| 389 | I | 1.000, 1.000 | N | 1.000, 1.000 |
| 390 | I | 1.000, 1.000 | N | 1.000, 1.000 |
| 391 | I | 1.000, 1.000 | N | 1.000, 1.000 |
| 392 | I | 1.000, 1.000 | N | 1.000, 1.000 |
| 393 | I | 1.000, 1.000 | N | 1.000, 1.000 |

|     |   |              |   |              |
|-----|---|--------------|---|--------------|
| 397 | I | 1.000, 1.000 | N | 1.000, 1.000 |
| 398 | I | 1.000, 1.000 | N | 1.000, 1.000 |
| 404 | I | 1.000, 1.000 | N | 1.000, 1.000 |
| 405 | I | 1.000, 1.000 | N | 1.000, 1.000 |
| 409 | I | 1.000, 1.000 | N | 1.000, 1.000 |
| 410 | I | 1.000, 1.000 | N | 1.000, 1.000 |
| 411 | I | 1.000, 1.000 | N | 1.000, 1.000 |
| 412 | I | 1.000, 1.000 | N | 1.000, 1.000 |
| 413 | I | 1.000, 1.000 | N | 1.000, 1.000 |
| 421 | I | 1.000, 1.000 | N | 1.000, 1.000 |
| 422 | I | 1.000, 1.000 | N | 1.000, 1.000 |
| 423 | I | 1.000, 1.000 | N | 1.000, 1.000 |
| 424 | I | 1.000, 1.000 | N | 1.000, 1.000 |
| 428 | I | 1.000, 1.000 | N | 1.000, 1.000 |
| 431 | I | 1.000, 1.000 | N | 1.000, 1.000 |
| 432 | I | 1.000, 1.000 | N | 1.000, 1.000 |
| 433 | I | 1.000, 1.000 | N | 1.000, 1.000 |
| 439 | I | 1.000, 1.000 | N | 1.000, 1.000 |
| 440 | I | 1.000, 1.000 | N | 1.000, 1.000 |
| 441 | I | 1.000, 1.000 | N | 1.000, 1.000 |
| 442 | I | 1.000, 1.000 | N | 1.000, 1.000 |
| 443 | I | 1.000, 1.000 | N | 1.000, 1.000 |
| 444 | I | 1.000, 1.000 | N | 1.000, 1.000 |
| 445 | I | 1.000, 1.000 | N | 1.000, 1.000 |
| 451 | I | 1.000, 1.000 | N | 1.000, 1.000 |
| 455 | I | 0.995, 1.000 | N | 0.999, 1.000 |
| 456 | I | 0.966, 1.000 | N | 1.000, 1.000 |
| 460 | I | 1.000, 1.000 | N | 1.000, 1.000 |
| 463 | I | 1.000, 1.000 | N | 1.000, 1.000 |
| 464 | I | 0.999, 0.999 | N | 1.000, 1.000 |
| 465 | M | 0.999, 0.999 | N | 1.000, 1.000 |
| 466 | M | 1.000, 1.000 | N | 1.000, 1.000 |
| 471 | I | 1.000, 1.000 | N | 1.000, 1.000 |

|     |   |              |   |              |
|-----|---|--------------|---|--------------|
| 472 | I | 1.000, 1.000 | N | 1.000, 1.000 |
| 476 | I | 1.000, 1.000 | N | 1.000, 1.000 |
| 477 | I | 1.000, 1.000 | N | 1.000, 1.000 |
| 478 | I | 1.000, 1.000 | N | 1.000, 1.000 |
| 482 | I | 1.000, 1.000 | N | 1.000, 1.000 |
| 485 | I | 1.000, 1.000 | N | 1.000, 1.000 |
| 486 | I | 1.000, 1.000 | N | 1.000, 1.000 |
| 487 | I | 1.000, 1.000 | N | 1.000, 1.000 |
| 488 | I | 1.000, 1.000 | N | 1.000, 1.000 |
| 489 | I | 1.000, 1.000 | N | 1.000, 1.000 |
| 490 | I | 1.000, 1.000 | N | 1.000, 1.000 |
| 491 | I | 1.000, 1.000 | N | 1.000, 1.000 |
| 492 | I | 1.000, 1.000 | N | 1.000, 1.000 |
| 493 | I | 1.000, 1.000 | N | 1.000, 1.000 |
| 494 | I | 1.000, 1.000 | N | 1.000, 1.000 |
| 495 | I | 1.000, 1.000 | N | 1.000, 1.000 |
| 496 | I | 1.000, 1.000 | N | 1.000, 1.000 |
| 497 | I | 1.000, 1.000 | N | 1.000, 1.000 |
| 504 | I | 1.000, 1.000 | N | 1.000, 1.000 |
| 505 | I | 1.000, 1.000 | N | 1.000, 1.000 |
| 509 | I | 1.000, 1.000 | N | 1.000, 1.000 |
| 512 | I | 1.000, 1.000 | N | 0.921, 1.000 |
| 516 | I | 1.000, 1.000 | N | 1.000, 1.000 |
| 520 | I | 1.000, 1.000 | N | 1.000, 1.000 |
| 521 | I | 1.000, 1.000 | N | 1.000, 1.000 |
| 522 | I | 1.000, 1.000 | N | 1.000, 1.000 |
| 526 | I | 1.000, 1.000 | N | 1.000, 1.000 |
| 529 | I | 1.000, 1.000 | N | 1.000, 1.000 |
| 530 | I | 1.000, 1.000 | N | 0.998, 1.000 |
| 531 | I | 1.000, 1.000 | N | 0.867, 1.000 |
| 532 | I | 1.000, 1.000 | N | 1.000, 1.000 |
| 538 | I | 1.000, 1.000 | N | 1.000, 1.000 |
| 539 | I | 1.000, 1.000 | N | 1.000, 1.000 |

|     |   |              |   |              |
|-----|---|--------------|---|--------------|
| 540 | I | 1.000, 1.000 | N | 1.000, 1.000 |
| 541 | I | 1.000, 1.000 | N | 1.000, 1.000 |

**Table S8:** Model selection from aBSREL, using AICc to infer the best model and optimal number of  $\omega$  classes (up to three) for each tree topology. The full adaptive model was selected for both topologies. Also reported are the best fit  $\omega$  summaries for both tree topologies.

| Tree topology   | Model fits          |           |           |            | $\omega$ summary |                       |               |               |                   |
|-----------------|---------------------|-----------|-----------|------------|------------------|-----------------------|---------------|---------------|-------------------|
|                 | Model               | AICc      | LogL      | Parameters | Tree topology    | $\omega$ rate classes | # of branches | % of branches | # under selection |
| Full dataset    | Nucleotide GTR      | 71309.49  | -35098.68 | 555        | Full dataset     | 1                     | 495           | 90.5          | 0                 |
|                 | Baseline MG94xREV   | 66967.94  | -32363.16 | 1108       |                  | 2                     | 52            | 9.5           | 1                 |
|                 | Full adaptive model | 66218.33  | -31881.83 | 1212       |                  |                       |               |               |                   |
| Reduced dataset | Nucleotide GTR      | 71291.44  | -35089.66 | 555        | Reduced dataset  | 1                     | 495           | 90.5          | 0                 |
|                 | Baseline MG94xREV   | 66927.017 | -32342.78 | 1108       |                  | 2                     | 52            | 9.5           | 0                 |
|                 | Full adaptive model | 66180.47  | -31862.90 | 1212       |                  |                       |               |               |                   |

**Table S9:** aBSREL  $\omega$  rates and distributions over sites and RELAX general descriptive k for full dataset tree topology (Fig. S3). Node numbers are displayed in Fig. S7.

| Node # or sequence name (Fig. S7)       | Branch label (Fig. 3, S3) | k (RELAX)   | $\omega$ 1 rate distribution over sites (% sites) | $\omega$ 2 rate distribution over sites (% sites) |
|-----------------------------------------|---------------------------|-------------|---------------------------------------------------|---------------------------------------------------|
| Echites_umbellatus_PA86_hss_exon1-7     |                           | 0.796223767 | $\omega$ 1 = 1.00 (100%)                          |                                                   |
| Echites_umbellatus_PA74_hss_exon1-7     |                           | 2.70013591  | $\omega$ 1 = 0.00 (100%)                          |                                                   |
| Echites_umbellatus_PA76_hss2_exon1-7    |                           | 0           | $\omega$ 1 = 10000000000 (100%)                   |                                                   |
| Echites_umbellatus_PA76_hss1_exon1-7    |                           | 0.828127102 | $\omega$ 1 = 1.00 (100%)                          |                                                   |
| Echites_umbellatus_1                    |                           | 0           | $\omega$ 1 = 10000000000 (100%)                   |                                                   |
| Echites_umbellatus_2                    |                           | 0.656440499 | $\omega$ 1 = 0.0955 (100%)                        |                                                   |
| Echites_turriger_TLA137_hss_exon1-7     |                           | 1.076789782 | $\omega$ 1 = 0.0506 (100%)                        |                                                   |
| Prestonia_coalita_2                     |                           | 0.370327313 | $\omega$ 1 = 0.150 (100%)                         |                                                   |
| Prestonia_coalita_1                     |                           | 0.300018657 | $\omega$ 1 = 0.170 (100%)                         |                                                   |
| Prestonia_portobellensis_51_hss_exon1-7 |                           | 1.250371821 | $\omega$ 1 = 0.0403 (100%)                        |                                                   |
| Parsonsia_eucalyptophylla_2             |                           | 0.101653342 | $\omega$ 1 = 0.340 (100%)                         |                                                   |
| Parsonsia_eucalyptophylla_1             |                           | 2.708579123 | $\omega$ 1 = 0.00 (100%)                          |                                                   |

|                                             |             |                            |                           |
|---------------------------------------------|-------------|----------------------------|---------------------------|
| Parsonsia_alboflavescens_PA90_hss_exon1-7   | 2.691076981 | $\omega_1 = 0.00$ (100%)   |                           |
| Rhodocalyx_rotundifolius_PA109b_hss_exon1-7 | 8.67274149  | $\omega_1 = 0.0499$ (100%) |                           |
| Rhodocalyx_riedelii_TL205_hss_exon1-7       | 0.127937998 | $\omega_1 = 0.291$ (100%)  |                           |
| Macropharynx_spectabilis_TL210_hss_exon1-7  | 1.308045153 | $\omega_1 = 0.0391$ (100%) |                           |
| Macropharynx_peltata_49_hss_exon1-7         | 0           | $\omega_1 = 1.48$ (100%)   |                           |
| Temnadenia_odorifera_TL213_hss_exon1-7      | 0.608327486 | $\omega_1 = 0.0788$ (100%) |                           |
| Laubertia_boissieri_TL220_hss_exon1-7       | 0.974861964 | $\omega_1 = 0.0472$ (99%)  | $\omega_2 = 21.3$ (0.81%) |
| Odontadenia_perrottetii_PA60B_hss_exon1-7   | 13.25293137 | $\omega_1 = 0.0341$ (99%)  | $\omega_2 = 21.6$ (0.58%) |
| Stipecoma_peltigera_TLA134_hss_exon1-6      | 0.411724527 | $\omega_1 = 0.103$ (100%)  |                           |
| Secundatia_densiflora_PA62B_hss_exon1-7     | 0.910884275 | $\omega_1 = 0.0503$ (100%) |                           |
| Mesechites_trifidus_45_hss_exon1-7          | 0.474235524 | $\omega_1 = 0.0967$ (100%) |                           |
| Allomarkgrafia_brenesiana_PA98_hss_exon1-7  | 2.711872506 | $\omega_1 = 0.00$ (100%)   |                           |
| Forsteronia_guyanensis_TLA39_hss_exon1-7    | 0.746276126 | $\omega_1 = 0.0857$ (100%) |                           |
| Mandevilla_longiflora                       | 0.28330643  | $\omega_1 = 0.168$ (100%)  |                           |
| Mandevilla_boliviensis_TLA76_hss_exon1-7    | 0.188341025 | $\omega_1 = 0.212$ (100%)  |                           |
| Pinochia_corymbosa_TL96_hss_exon1-7         | 0.185008052 | $\omega_1 = 0.191$ (100%)  |                           |
| Elytropus_chilensis_TL208_hss_exon1-6       | 0.792167002 | $\omega_1 = 1.00$ (100%)   |                           |
| Elytropus_chilensis_TLA257_hss_exon1-7      | 0.792167002 | $\omega_1 = 1.00$ (100%)   |                           |
| Anodendron_oblongifolium_PA100_hss2_exon3-7 | 0.792626139 | $\omega_1 = 1.00$ (100%)   |                           |



|                                             |             |                                 |
|---------------------------------------------|-------------|---------------------------------|
| Anodendron_affine_PA79_hss1_exon1-7         | 0.788922399 | $\omega_1 = 1.00$ (100%)        |
| Anodendron_affine_PA79_hss2_exon1-7         | 0.34971664  | $\omega_1 = 0.143$ (100%)       |
| Anodendron_oblongifolium_PA100_hss1_exon1-6 | 0           | $\omega_1 = 10000000000$ (100%) |
| Anodendron_parviflorum_TLA135_hss_exon1-7   | 0.214432918 | $\omega_1 = 0.203$ (100%)       |
| Papuechites_aambe_TLA130_hss_exon1-7        | 0.329651632 | $\omega_1 = 0.160$ (100%)       |
| Aganosma_schlechteriana_TLA24_hss_exon1-7   | 0.220807419 | $\omega_1 = 0.203$ (100%)       |
| Epigynum_griffithianum_TLA195_hss_exon1-6   | 2.779271698 | $\omega_1 = 0.00$ (100%)        |
| Epigynum_cochinchinensis_TLA62_hss_exon1-6  | 14.26574483 | $\omega_1 = 0.117$ (100%)       |
| Ichnocarpus_frutescens_TL621_hss_exon1-6    | 0.18265822  | $\omega_1 = 0.174$ (100%)       |
| Amalocalyx_microlobus_TLA272_hss_exon1-6    | 0.603932151 | $\omega_1 = 0.102$ (100%)       |
| Trachelospermum_asiaticum_PA66B_hss_exon1-7 | 0.096905156 | $\omega_1 = 0.355$ (100%)       |
| Trachelospermum_axillare_TLA84_hss_exon2-7  | 2.701408646 | $\omega_1 = 0.00$ (100%)        |
| Chonemorpha_fragrans_TLA37_hss_exon1-7      | 0.160539413 | $\omega_1 = 0.235$ (100%)       |
| Eucorymbia_alba_PA104_hss_exon1-6           | 0.195653274 | $\omega_1 = 0.210$ (100%)       |
| Amphineurion_marginatum_55_hss_exon1-7      | 0.856694879 | $\omega_1 = 0.0515$ (100%)      |
| Vallaris_solanacea_TLA90_hss_exon1-7        | 0.433393636 | $\omega_1 = 0.134$ (100%)       |
| Beaumontia_murtonii_53_hss_exon1-6          | 0.152045202 | $\omega_1 = 0.256$ (100%)       |

|                                                |             |                            |                           |
|------------------------------------------------|-------------|----------------------------|---------------------------|
| Streptoechites_chinensis_54_hss_exon1-6        | 0.195251786 | $\omega_1 = 0.201$ (100%)  |                           |
| Rhabdadenia_madida_TL206_hss_exon1-7           | 0.394289571 | $\omega_1 = 0.141$ (100%)  |                           |
| Rhabdadenia_biflora_1                          | 0.244049605 | $\omega_1 = 0.132$ (98%)   | $\omega_2 = 5000$ (1.6%)  |
| Gymnanthera_oblonga_TLP274_hss_exon2-6         | 0.095402473 | $\omega_1 = 0.0900$ (100%) |                           |
| Finlaysonia_insularum_TL63_hss_exon1-6         | 35.87119205 | $\omega_1 = 0.0749$ (100%) |                           |
| Finlaysonia_lanuginosa_TLP286_hss_exon1-7      | 0.24965908  | $\omega_1 = 0.102$ (100%)  |                           |
| Petopentia_natalensis_TLP78_hss_exon1-7        | 0.427011949 | $\omega_1 = 0.126$ (100%)  |                           |
| Raphionacme_flanaganii_P79_hss_exon1-6         | 0.226739872 | $\omega_1 = 0.259$ (100%)  |                           |
| Ruehssia_laxiflora_TLAsc225_hss_exon1-6        | 0.112159485 | $\omega_1 = 0.284$ (100%)  |                           |
| Ruehssia_macrophylla_TL226_hss2_exon1-7        | 0.150176521 | $\omega_1 = 0.254$ (100%)  |                           |
| Ruehssia_guaranitica_TLAsc227_hss_exon1-7      | 0.097878628 | $\omega_1 = 0.349$ (100%)  |                           |
| Ruehssia_caatingae_PA111_hss2_exon1-6          | 0.401942585 | $\omega_1 = 0.141$ (100%)  |                           |
| Gymnema_sylvestre_TL615_hss_exon1-6            | 0.275029388 | $\omega_1 = 0.174$ (100%)  |                           |
| Gongronema_angolense_TL383_hss2_exon1-6        | 0.095081178 | $\omega_1 = 0.361$ (100%)  |                           |
| Gongronema_latifolium_TL381_hss2_exon1-6       | 0.392203416 | $\omega_1 = 0.144$ (100%)  |                           |
| Marsdenia_truncata_TL397_hss1_exon1-7          | 0.490073751 | $\omega_1 = 0.122$ (100%)  |                           |
| Gongronema_taylorii_TL377_hss_exon1-6          | 0.689705949 | $\omega_1 = 0.0896$ (100%) |                           |
| Gongronema_angolense_TL383_hss1_exon1-6        | 50          | $\omega_1 = 0.00$ (99%)    | $\omega_2 = 5000$ (0.64%) |
| Stigmatorhynchus_umbellifer_TL394_hss1_exon1-6 | 2.700579525 | $\omega_1 = 0.00$ (100%)   |                           |

|                                                |             |                            |                                  |
|------------------------------------------------|-------------|----------------------------|----------------------------------|
| Jasminanthes_maingayi_PA85_hss2_exon1-6        | 0.268466246 | $\omega_1 = 0.176$ (100%)  |                                  |
| Marsdenia_longipedicellata_TL262_hss1_exon1-7  | 0.68014885  | $\omega_1 = 0.0634$ (100%) |                                  |
| Dischidia_albida_PA67bB_hss_exon1-6            | 0           | $\omega_1 = 1.03$ (100%)   |                                  |
| Dischidia_cleistantha_TLAsc401_hss_exon1-7     | 0.009393782 | $\omega_1 = 0.617$ (99%)   | $\omega_2 = 173$ (0.50%)         |
| Hoya_yuennanensis_TL238_hss_exon1-6            | 0.034282251 | $\omega_1 = 0.713$ (100%)  |                                  |
| Marsdenia_coronata_TLAsc118_hss_exon1-7        | 0.024408718 | $\omega_1 = 0.725$ (100%)  |                                  |
| Marsdenia_flavescens_TLAsc126_hss1_exon1-7     | 0.02711969  | $\omega_1 = 0.713$ (100%)  |                                  |
| Marsdenia_glabra_TL99_hss_exon1-7              | 0.145318505 | $\omega_1 = 0.337$ (99%)   | $\omega_2 = 10000000000$ (0.65%) |
| Marsdenia_tinctoria_TL376_hss_exon1-7          | 0.079372932 | $\omega_1 = 0.353$ (100%)  |                                  |
| Campestigma_purpureum_TL94_hss2_exon1-6        | 0.239993367 | $\omega_1 = 0.189$ (100%)  |                                  |
| Sarcolobus_cambogensis_TL628_hss2_exon1-6      | 0.603681072 | $\omega_1 = 0.101$ (100%)  |                                  |
| Lygisma_angustifolia_TL98_hss_exon1-7          | 0.364868665 | $\omega_1 = 0.108$ (100%)  |                                  |
| Jasminanthes_maingayi_PA85_hss3_exon1-6        | 0.080121921 | $\omega_1 = 0.354$ (100%)  |                                  |
| Anisopus_efulensis_TL386_hss_exon1-7           | 0.007402977 | $\omega_1 = 0.757$ (100%)  |                                  |
| Ruehssia_caatingae_PA111_hss1_exon1-6          | 28.76981914 | $\omega_1 = 0.00$ (98%)    | $\omega_2 = 105$ (1.7%)          |
| Ruehssia_macrophylla_TL226_hss1_exon1-6        | 0           | $\omega_1 = 0.860$ (100%)  |                                  |
| Stigmatorhynchus_umbellifer_TL394_hss2_exon1-6 | 0.807656536 | $\omega_1 = 1.00$ (100%)   |                                  |
| Gongronema_angolense_TL383_hss4_exon1-6        | 0.096417483 | $\omega_1 = 1.00$ (100%)   |                                  |
| Sarcolobus_cambogensis_TL628_hss1_exon1-7      | 0.206721106 | $\omega_1 = 0.238$ (100%)  |                                  |

|                                               |             |                            |                          |
|-----------------------------------------------|-------------|----------------------------|--------------------------|
| Campestigma_purpureum_TL94_hss1_exon1-6       | 0.113687271 | $\omega_1 = 0.215$ (100%)  |                          |
| Marsdenia_truncata_TL397_hss2_exon1-6         | 0.11205212  | $\omega_1 = 0.313$ (100%)  |                          |
| Gongronema_angolense_TL383_hss5_exon2-6       | 2.720448526 | $\omega_1 = 0.00$ (100%)   |                          |
| Gongronema_angolense_TL383_hss3_exon2-6       | 0.109838093 | $\omega_1 = 0.320$ (100%)  |                          |
| Marsdenia_flavescens_TLAsc126_hss2_exon2-6    | 1.121163131 | $\omega_1 = 0.0492$ (100%) |                          |
| Marsdenia_longipedicellata_TL262_hss2_exon1-6 | 0.114384527 | $\omega_1 = 0.228$ (100%)  |                          |
| Gongronema_latifolium_TL381_hss1_exon1-7      | 22.18972259 | $\omega_1 = 0.00$ (98%)    | $\omega_2 = 30.5$ (2.5%) |
| Jasminanthes_maingayi_PA85_hss1_exon1-7       | 0.050673177 | $\omega_1 = 0.446$ (99%)   | $\omega_2 = 336$ (0.87%) |
| Tassadia_propinqua_33_hss_exon3-7             | 0.12675591  | $\omega_1 = 0.288$ (100%)  |                          |
| Tassadia_berteroanum_PA34_hss_exon1-7         | 1.346262405 | $\omega_1 = 0.0364$ (100%) |                          |
| Peplonia_adnata_PA113_hss_exon1-7             | 0.122544575 | $\omega_1 = 0.00$ (87%)    | $\omega_2 = 3.28$ (13%)  |
| Diplolepis_geminiflora_36_hss_exon1-7         | 0           | $\omega_1 = 1.11$ (100%)   |                          |
| Calotropis_gigantea_hss                       | 0.655874536 | $\omega_1 = 0.104$ (100%)  |                          |
| Fockea_edulis_TL184_hss_exon1-7               | 0.602217032 | $\omega_1 = 0.103$ (100%)  |                          |
| Toxocarpus_villosus_TLS261_hss_exon1-7        | 0.49734864  | $\omega_1 = 0.118$ (100%)  |                          |
| Baijsea_viridiflora_TL622_hss_exon1-6         | 0.190067375 | $\omega_1 = 0.144$ (100%)  |                          |
| Baijsea_myrtifolia_TL638_hss_exon1-7          | 0.146829003 | $\omega_1 = 0.213$ (100%)  |                          |
| Oncinotis_glabrata_TL417_hss_exon1-7          | 0.420905361 | $\omega_1 = 0.0892$ (100%) |                          |
| Malouetiella_mildbraedii_TLA246_hss_exon1-7   | 0.702247342 | $\omega_1 = 0.0888$ (100%) |                          |

|                                              |             |                                 |                                  |
|----------------------------------------------|-------------|---------------------------------|----------------------------------|
| Kibatalia_macrophylla_TLA18_hss_exon1-7      | 0.749918872 | $\omega_1 = 0.0825$ (100%)      |                                  |
| Funtumia_elastica_TLA144_hss_exon1-7         | 12.3519515  | $\omega_1 = 0.00$ (100%)        | $\omega_2 = 30.3$ (0.37%)        |
| Holarrhena_curtisii_TLA17_hss_exon1-7        | 0.09859379  | $\omega_1 = 0.329$ (100%)       |                                  |
| Mascarenhasia_arborescens_TLA143_hss_exon1-7 | 0.442504448 | $\omega_1 = 0.135$ (100%)       |                                  |
| Galactophora_schomburgkiana_PA87_hss_exon1-7 | 0.273205678 | $\omega_1 = 0.0747$ (95%)       | $\omega_2 = 3.80$ (5.0%)         |
| Strophanthus_boivinii_TLA133_hss_exon1-7     | 0.25332579  | $\omega_1 = 0.0835$ (97%)       | $\omega_2 = 16.2$ (2.6%)         |
| Alafia_thouarsii_TL216_hss_exon1-7           | 26.38982323 | $\omega_1 = 0.00$ (99%)         | $\omega_2 = 209$ (0.66%)         |
| Alafia_barteri_52_hss_exon1-7                | 0.673468514 | $\omega_1 = 0.0940$ (100%)      |                                  |
| Isonema_smeathmannii_TLA142_hss_exon1-6      | 0.218600744 | $\omega_1 = 0.0954$ (99%)       | $\omega_2 = 183$ (1.5%)          |
| Echites_umbellatus_PA76_dhs2_exon1-7         | 2.715712433 | $\omega_1 = 0.00$ (100%)        |                                  |
| Echites_umbellatus_PA76_dhs1_exon1-7         | 0.788430026 | $\omega_1 = 1.00$ (100%)        |                                  |
| Echites_umbellatus_PA86_dhs_exon1-7          | 0.100708095 | $\omega_1 = 0.350$ (100%)       |                                  |
| Echites_umbellatus_3                         | 0.784091198 | $\omega_1 = 1.00$ (100%)        |                                  |
| Echites_umbellatus_4                         | 50          | $\omega_1 = 10000000000$ (100%) |                                  |
| Echites_umbellatus_PA74_dhs_exon1-7          | 0.784091198 | $\omega_1 = 1.00$ (100%)        |                                  |
| Echites_woodsonianus_2                       | 16.83442394 | $\omega_1 = 0.104$ (99%)        | $\omega_2 = 10000000000$ (0.77%) |
| Echites_turriger_TLA137_dhs_exon1-7          | 0.283309851 | $\omega_1 = 0.170$ (100%)       |                                  |
| Prestonia_portobellensis_51_dhs_exon1-7      | 0.823874586 | $\omega_1 = 0.0855$ (100%)      |                                  |
| Prestonia_coalita_3                          | 0.103959797 | $\omega_1 = 0.326$ (100%)       |                                  |
| Parsonsia_alboflavescens_PA90_dhs_exon1-7    | 48.55876297 | $\omega_1 = 0.00$ (100%)        |                                  |
| Macropharynx_spectabilis_TL210_dhs_exon1-7   | 19.4091351  | $\omega_1 = 0.00$ (99%)         | $\omega_2 = 26.8$ (1.3%)         |

|                                             |             |                            |                          |
|---------------------------------------------|-------------|----------------------------|--------------------------|
| Macropharynx_peltata_49_dhs_exon1-7         | 2.69970798  | $\omega_1 = 0.00$ (100%)   |                          |
| Rhodocalyx_rotundifolius_PA109b_dhs_exon1-7 | 0.424060421 | $\omega_1 = 0.102$ (100%)  |                          |
| Rhodocalyx_riedelii_TL205_dhs_exon1-7       | 0.170874199 | $\omega_1 = 0.178$ (100%)  |                          |
| Temnadenia_odorifera_TL213_dhs_exon1-7      | 0.255212889 | $\omega_1 = 0.184$ (100%)  |                          |
| Laubertia_boissieri_TL220_dhs_exon1-7       | 0.472200659 | $\omega_1 = 0.0960$ (100%) |                          |
| Secondatia_densiflora_PA62B_dhs_exon1-7     | 0.713529542 | $\omega_1 = 0.0684$ (100%) |                          |
| Odontadenia_perrottetii_PA60B_dhs_exon1-7   | 15.72232602 | $\omega_1 = 0.00$ (99%)    | $\omega_2 = 14.2$ (1.2%) |
| Stipecoma_peltigera_TLA134_dhs_exon1-7      | 0.595929879 | $\omega_1 = 0.102$ (100%)  |                          |
| Allomarkgrafia_brenesiana_PA98_dhs_exon1-7  | 0.475802512 | $\omega_1 = 0.0956$ (100%) |                          |
| Mesechites_trifidus_45_dhs_exon1-7          | 0.0838613   | $\omega_1 = 0.394$ (100%)  |                          |
| Mandevilla_boliviensis_TLA76_dhs_exon1-7    | 0.305358996 | $\omega_1 = 0.170$ (100%)  |                          |
| Forsteronia_guyanensis_TLA39_dhs_exon1-6    | 0.388022915 | $\omega_1 = 0.145$ (100%)  |                          |
| Pinochia_corymbosa_TL96_dhs_exon1-7         | 0.410243286 | $\omega_1 = 0.0984$ (100%) |                          |
| Elytropus_chilensis_TLA257_dhs_exon1-7      | 0.781957662 | $\omega_1 = 1.00$ (100%)   |                          |
| Elytropus_chilensis_TL208_dhs_exon1-7       | 2.700019743 | $\omega_1 = 0.00$ (100%)   |                          |
| Aganosma_schlechteriana_TLA24_dhs_exon1-7   | 0.107336412 | $\omega_1 = 0.399$ (100%)  |                          |
| Epigynum_auritum                            | 44.60835261 | $\omega_1 = 0.00$ (98%)    | $\omega_2 = 1690$ (2.0%) |
| Epigynum_cochinchinensis_TLA62_dhs_exon1-7  | 2.69903187  | $\omega_1 = 0.00$ (100%)   |                          |
| Ichnocarpus_frutescens_TL621_dhs_exon1-7    | 0.282808162 | $\omega_1 = 0.177$ (100%)  |                          |

|                                             |             |                                 |
|---------------------------------------------|-------------|---------------------------------|
| Epigynum_griffithianum_TLA195_dhs_exon1-7   | 0.864351658 | $\omega_1 = 0.0700$ (100%)      |
| Pottsia_laxiflora                           | 0.426405822 | $\omega_1 = 0.135$ (100%)       |
| Chonemorpha_fragrans_TLA37_dhs_exon1-7      | 17.34356765 | $\omega_1 = 0.0914$ (100%)      |
| Trachelospermum_asiatikum_PA66B_dhs_exon1-7 | 1.241245387 | $\omega_1 = 0.0436$ (100%)      |
| Trachelospermum_axillare_TLA84_dhs_exon1-7  | 0.090789346 | $\omega_1 = 0.377$ (100%)       |
| Amalocalyx_microlobus_TLA272_dhs_exon1-7    | 0.781957662 | $\omega_1 = 1.00$ (100%)        |
| Amalocalyx_microlobus                       | 2.709061973 | $\omega_1 = 0.00$ (100%)        |
| Apocynum_pictum_PA84_dhs_exon1-7            | 2.735992326 | $\omega_1 = 0.00$ (100%)        |
| Apocynum_venetum_PA82_dhs_exon1-7           | 0.781957662 | $\omega_1 = 1.00$ (100%)        |
| Apocynum_venetum_PA80_dhs_exon1-7           | 0           | $\omega_1 = 10000000000$ (100%) |
| Apocynum_cannabinum_44_dhs_exon1-7          | 0           | $\omega_1 = 10000000000$ (100%) |
| Apocynum_androsaemifolium                   | 0.534065778 | $\omega_1 = 0.117$ (100%)       |
| Apocynum_androsaemifolium_TLA35_dhs_exon1-7 | 2.700061694 | $\omega_1 = 0.00$ (100%)        |
| Streptochites_chinensis_54_dhs_exon1-7      | 0.398630591 | $\omega_1 = 0.108$ (100%)       |
| Eucorymbia_alba_PA104_dhs_exon1-7           | 0.554973889 | $\omega_1 = 0.110$ (100%)       |
| Amphineurion_marginatum_55_dhs_exon1-7      | 0.428891034 | $\omega_1 = 0.136$ (100%)       |
| Papuechites_aambe_TLA130_dhs_exon1-7        | 0.287529283 | $\omega_1 = 0.132$ (100%)       |
| Anodendron_oblongifolium_PA100_dhs_exon1-7  | 2.702998892 | $\omega_1 = 0.00$ (100%)        |
| Anodendron_affine_PA79_dhs_exon1-7          | 0.287684484 | $\omega_1 = 0.0871$ (100%)      |
| Anodendron_parviflorum_TLA135_dhs_exon1-7   | 0.385966099 | $\omega_1 = 0.146$ (100%)       |
| Vallaris_solanacea_TLA90_dhs_exon1-7        | 1.131126481 | $\omega_1 = 0.0493$ (100%)      |

|                                               |             |                                 |                          |
|-----------------------------------------------|-------------|---------------------------------|--------------------------|
| Beaumontia_murtonii_53_dhs_exon1-7            | 0.88339202  | $\omega_1 = 0.0689$ (100%)      |                          |
| Marsdenia_truncata_TL397_dhs_exon1-7          | 0.008907652 | $\omega_1 = 0.888$ (100%)       |                          |
| Gongronema_latifolium_TL381_dhs_exon1-7       | 0.026964686 | $\omega_1 = 0.709$ (100%)       |                          |
| Marsdenia_longipedicellata_TL262_dhs_exon1-7  | 2.721312489 | $\omega_1 = 0.00$ (100%)        |                          |
| Gongronema_angolense_TL383_dhs_exon1-7        | 0.880636494 | $\omega_1 = 1.00$ (100%)        |                          |
| Ruehssia_caatingae_PA111_dhs_exon1-7          | 0.519582066 | $\omega_1 = 0.118$ (100%)       |                          |
| Ruehssia_guaranitica_TLAsc227_dhs_exon1-7     | 34.22629598 | $\omega_1 = 0.00$ (100%)        | $\omega_2 = 291$ (0.31%) |
| Ruehssia_macrophylla_TL226_dhs_exon1-7        | 0.144405043 | $\omega_1 = 0.267$ (100%)       |                          |
| Ruehssia_laxiflora_TLAsc225_dhs_exon1-7       | 0.09696701  | $\omega_1 = 0.355$ (100%)       |                          |
| Jasminanthes_maingayi_PA85_dhs_exon1-7        | 0.072832882 | $\omega_1 = 0.357$ (100%)       |                          |
| Gymnema_sylvestre_TL615_dhs_exon1-7           | 0.172425308 | $\omega_1 = 0.234$ (100%)       |                          |
| Stigmatorhynchus_umbellifer_TL394_dhs_exon1-7 | 0.367829453 | $\omega_1 = 0.150$ (100%)       |                          |
| Sarcolobus_cambogensis_TL628_dhs_exon1-7      | 0.295588454 | $\omega_1 = 0.172$ (100%)       |                          |
| Campestigma_purpureum_TL94_dhs_exon1-7        | 0.719437444 | $\omega_1 = 0.0864$ (100%)      |                          |
| Lygisma_angustifolia_TL98_dhs_exon1-7         | 0.383984545 | $\omega_1 = 0.116$ (100%)       |                          |
| Anisopus_efulensis_TL386_dhs_exon1-7          | 2.700367775 | $\omega_1 = 0.00$ (100%)        |                          |
| Gongronema_taylorii_TL377_dhs_exon1-7         | 0.409141268 | $\omega_1 = 0.141$ (100%)       |                          |
| Marsdenia_glabra_TL99_dhs_exon1-7             | 0.14211424  | $\omega_1 = 0.268$ (100%)       |                          |
| Marsdenia_tinctoria_TL376_dhs_exon1-7         | 0           | $\omega_1 = 10000000000$ (100%) |                          |



|                                            |             |                            |                          |
|--------------------------------------------|-------------|----------------------------|--------------------------|
| Marsdenia_coronata_TLAsc118_dhs_exon1-7    | 2.722623215 | $\omega_1 = 0.00$ (100%)   |                          |
| Marsdenia_flavescens_TLAsc126_dhs_exon1-7  | 0.148501956 | $\omega_1 = 0.174$ (100%)  |                          |
| Dischidia_albida_PA67bB_dhs_exon1-7        | 0.232846735 | $\omega_1 = 0.198$ (100%)  |                          |
| Dischidia_cleistantha_TLAsc401_dhs_exon1-7 | 1.424616819 | $\omega_1 = 0.0358$ (100%) |                          |
| Hoya_yuennanensis_TL238_dhs_exon1-7        | 0.191491508 | $\omega_1 = 0.217$ (100%)  |                          |
| Tassadia_propinqua_33_dhs_exon1-7          | 0.387849155 | $\omega_1 = 0.0727$ (100%) |                          |
| Tassadia_berteroanum_PA34_dhs_exon1-7      | 0.377782955 | $\omega_1 = 0.147$ (100%)  |                          |
| Peplonia_adnata_PA113_dhs_exon1-7          | 0.305147997 | $\omega_1 = 0.132$ (100%)  |                          |
| Diplolepis_geminiflora_36_dhs_exon1-7      | 0.189303468 | $\omega_1 = 0.161$ (100%)  |                          |
| Asclepias_curassavica                      | 21.83054667 | $\omega_1 = 0.121$ (98%)   | $\omega_2 = 28.5$ (1.8%) |
| Asclepias_syriaca_2                        | 2.698933031 | $\omega_1 = 0.00$ (100%)   |                          |
| Calotropis_gigantea_dhs                    | 28.68374157 | $\omega_1 = 0.105$ (94%)   | $\omega_2 = 135$ (5.9%)  |
| Fockea_edulis_TL184_dhs_exon1-7            | 0.401539002 | $\omega_1 = 0.146$ (100%)  |                          |
| Toxocarpus_villosus_TLS261_dhs_exon1-7     | 0.4243468   | $\omega_1 = 0.108$ (100%)  |                          |
| Baijsea_viridiflora_TL622_dhs_exon1-7      | 1.091442874 | $\omega_1 = 0.0516$ (100%) |                          |
| Baijsea_myrtifolia_TL638_dhs_exon1-7       | 0.136283296 | $\omega_1 = 0.271$ (100%)  |                          |
| Oncinotis_glabrata_TL417_dhs_exon1-7       | 0.389451183 | $\omega_1 = 0.145$ (100%)  |                          |
| Finlaysonia_lanuginosa_TLP286_dhs_exon1-7  | 0.10167445  | $\omega_1 = 0.346$ (100%)  |                          |
| Zygostelma_benthamii_TL105_dhs_exon1-7     | 0.461960219 | $\omega_1 = 0.129$ (100%)  |                          |
| Finlaysonia_insularum_TL63_dhs1_exon1-7    | 2.699313146 | $\omega_1 = 0.00$ (100%)   |                          |

|                                              |             |                            |                          |
|----------------------------------------------|-------------|----------------------------|--------------------------|
| Finlaysonia_insularum_TL63_dhs2_exon1-7      | 2.700397149 | $\omega_1 = 0.00$ (100%)   |                          |
| Gymnanthera_oblonga_TLP274_dhs_exon1-6       | 0.68822909  | $\omega_1 = 0.364$ (100%)  |                          |
| Raphionacme_flanagani_P79_dhs_exon1-7        | 0.625172622 | $\omega_1 = 0.100$ (100%)  |                          |
| Petopentia_natalensis_TLP78_dhs_exon1-7      | 0.89594281  | $\omega_1 = 0.0382$ (100%) |                          |
| Rhabdadenia_madida_TL206_dhs_exon1-7         | 0.209047121 | $\omega_1 = 0.175$ (100%)  |                          |
| Malouetiella_mildbraedii_TLA246_dhs_exon1-7  | 0.526441727 | $\omega_1 = 0.117$ (100%)  |                          |
| Funtumia_elastica_TLA144_dhs2_exon1-7        | 0           | $\omega_1 = 1.44$ (100%)   |                          |
| Kibatalia_macrophylla_TLA18_dhs1_exon1-7     | 0.286292237 | $\omega_1 = 0.0867$ (100%) |                          |
| Kibatalia_macrophylla_TLA18_dhs2_exon1-7     | 0.051277215 | $\omega_1 = 0.526$ (100%)  |                          |
| Funtumia_elastica_TLA144_dhs1_exon1-7        | 0.162596036 | $\omega_1 = 0.242$ (100%)  |                          |
| Holarrhena_curtisii_TLA17_dhs_exon1-7        | 14.59035361 | $\omega_1 = 0.0575$ (100%) |                          |
| Holarrhena_pubescens_2                       | 2.735200665 | $\omega_1 = 0.00$ (100%)   |                          |
| Mascarenhasia_arborescens_TLA143_dhs_exon1-7 | 0.604686047 | $\omega_1 = 0.102$ (100%)  |                          |
| Galactophora_schomburgkiana_PA87_dhs_exon1-7 | 0.483417499 | $\omega_1 = 0.115$ (100%)  |                          |
| Pachypodium_baronii_47_dhs_exon1-7           | 0.276254583 | $\omega_1 = 0.157$ (100%)  |                          |
| Neobraccia_valenzuelana                      | 0.682735131 | $\omega_1 = 0.0947$ (100%) |                          |
| Nerium_oleander_TLA109_dhs_exon1-7           | 0.056723262 | $\omega_1 = 0.473$ (100%)  |                          |
| Adenium_obesum                               | 0.979049284 | $\omega_1 = 0.0587$ (100%) |                          |
| Alafia_barteri_52_dhs_exon1-7                | 0.213488085 | $\omega_1 = 0.152$ (100%)  |                          |
| Alafia_thouarsii_TL216_dhs_exon1-7           | 0.160916584 | $\omega_1 = 0.247$ (100%)  |                          |
| Isonema_smeathmannii_TLA142_dhs_exon1-7      | 18.64627925 | $\omega_1 = 0.0259$ (98%)  | $\omega_2 = 18.1$ (1.6%) |

|                                               |             |                                 |
|-----------------------------------------------|-------------|---------------------------------|
| Strophanthus_boivinii_TLA133_dhs3_exon1-7     | 0.098885753 | $\omega_1 = 0.355$ (100%)       |
| Strophanthus_boivinii_TLA133_dhs1_exon1-7     | 0.814574707 | $\omega_1 = 1.00$ (100%)        |
| Strophanthus_boivinii_TLA133_dhs2_exon1-7     | 0.460976736 | $\omega_1 = 0.132$ (100%)       |
| Strophanthus_preussii_TLA10_dhs_exon1-7       | 0.191738999 | $\omega_1 = 0.217$ (100%)       |
| Wrightia_lanceolata_TL103_dhs2_exon1-7        | 0           | $\omega_1 = 10000000000$ (100%) |
| Wrightia_arborea_TLA91_dhs2_exon1-7           | 0.524714774 | $\omega_1 = 0.00$ (100%)        |
| Wrightia_religiosa_TL104_dhs2_exon1-7         | 0.289063106 | $\omega_1 = 0.117$ (100%)       |
| Pleioceras_barteri_TLA244_dhs2_exon1-7        | 2.730072312 | $\omega_1 = 0.00$ (100%)        |
| Stephanostema_stenocarpum_TLA232_dhs2_exon1-7 | 0.523396243 | $\omega_1 = 0.141$ (100%)       |
| Wrightia_natalensis                           | 0.192710667 | $\omega_1 = 0.334$ (100%)       |
| Wrightia_arborea_TLA91_dhs1_exon1-7           | 0.536784421 | $\omega_1 = 0.116$ (100%)       |
| Wrightia_religiosa_TL104_dhs1_exon1-7         | 0.534857074 | $\omega_1 = 0.116$ (100%)       |
| Wrightia_lanceolata_TL103_dhs1_exon1-7        | 0.028891666 | $\omega_1 = 0.696$ (100%)       |
| Stephanostema_stenocarpum_TLA232_dhs1_exon1-7 | 0.514060949 | $\omega_1 = 0.116$ (100%)       |
| Pleioceras_barteri_TLA244_dhs1_exon1-7        | 0           | $\omega_1 = 10000000000$ (100%) |
| Rauvolfia_balansae_PA106_dhs_exon1-7          | 0.143670327 | $\omega_1 = 0.267$ (100%)       |
| Rauvolfia_tetraphylla                         | 0.243280105 | $\omega_1 = 0.139$ (100%)       |
| Rauvolfia_vomitoria_PA108_dhs_exon1-7         | 0.434286031 | $\omega_1 = 0.133$ (100%)       |
| Rauvolfia_serpentina                          | 0.176163629 | $\omega_1 = 0.167$ (100%)       |
| Rauvolfia_verticillata_PA91_dhs_exon1-7       | 0.463149762 | $\omega_1 = 0.0638$ (100%)      |

|                                               |             |                            |                           |
|-----------------------------------------------|-------------|----------------------------|---------------------------|
| Kamettia_chandeei                             | 14.5974206  | $\omega_1 = 0.0759$ (99%)  | $\omega_2 = 39.3$ (0.81%) |
| Catharanthus_ovalis                           | 0.791827594 | $\omega_1 = 1.00$ (100%)   |                           |
| Catharanthus_roseus                           | 0.793796612 | $\omega_1 = 1.00$ (100%)   |                           |
| Catharanthus_longifolius                      | 0.350445004 | $\omega_1 = 0.00$ (100%)   |                           |
| Vinca_minor                                   | 0.167475072 | $\omega_1 = 0.244$ (100%)  |                           |
| Vinca_major_43_dhs_exon1-7                    | 0.315890992 | $\omega_1 = 0.0827$ (100%) |                           |
| Ochrosia_poweri_PA89_dhs_exon1-7              | 0.092772352 | $\omega_1 = 0.365$ (100%)  |                           |
| Ochrosia_coccinea_PA88_dhs_exon1-7            | 0.364629562 | $\omega_1 = 0.151$ (100%)  |                           |
| Pycnobotrya_nitida_59_dhs_exon1-7             | 0.604849685 | $\omega_1 = 0.0909$ (100%) |                           |
| Diplorhynchus_condylocarpon_70_dhs_exon1-7    | 0.210510588 | $\omega_1 = 0.00246$ (93%) | $\omega_2 = 4.07$ (7.1%)  |
| Plectaneia_thouarsii                          | 1.684727401 | $\omega_1 = 0.0276$ (100%) |                           |
| Kopsia_rosea_69_dhs_exon1-7                   | 0.511961032 | $\omega_1 = 0.100$ (100%)  | $\omega_2 = 12.6$ (0.49%) |
| Tabernaemontana_bufalina_PA93_dhs_exon1-7     | 0.788840815 | $\omega_1 = 1.00$ (100%)   |                           |
| Tabernaemontana_bufalina_PA92_dhs_exon1-7     | 0.026272008 | $\omega_1 = 0.716$ (100%)  |                           |
| Tabernaemontana_elegans                       | 0.406021788 | $\omega_1 = 0.105$ (100%)  |                           |
| Tabernaemontana_peduncularis_PA95_dhs_exon1-7 | 0.094224378 | $\omega_1 = 0.363$ (100%)  |                           |
| Tabernaemontana_pandacahui_PA94_dhs_exon1-7   | 2.720698541 | $\omega_1 = 0.00$ (100%)   |                           |
| Craspidospermum_verticillatum_58_dhs_exon1-7  | 0.38253518  | $\omega_1 = 0.122$ (100%)  |                           |
| Hunteria_zeilanica_67c_dhs_exon1-7            | 1.513506405 | $\omega_1 = 0.0313$ (100%) |                           |
| Amsonia_hubrichtii_1                          | 0.785696852 | $\omega_1 = 1.00$ (100%)   |                           |
| Amsonia_hubrichtii_2                          | 0           | $\omega_1 = 1.45$ (100%)   |                           |
| Amsonia_orientalis_PA97_dhs_exon1-7           | 0           | $\omega_1 = 1.10$ (100%)   |                           |
| Himatanthus_obovatus_PA99_dhs_exon1-7         | 0.787970202 | $\omega_1 = 1.00$ (100%)   |                           |
| Himatanthus_bracteatus                        | 0.786233123 | $\omega_1 = 1.00$ (100%)   |                           |

|                                       |   |             |                                 |                           |
|---------------------------------------|---|-------------|---------------------------------|---------------------------|
| Plumeria_cubensis_48_dhs_exon1-7      |   | 0.186467903 | $\omega_1 = 0.188$ (100%)       |                           |
| Allamanda_schottii_46_dhs_exon1-7     |   | 0.467171689 | $\omega_1 = 0.101$ (100%)       | $\omega_2 = 42.1$ (0.41%) |
| Thevetia_peruviana_56_dhs_exon1-7     |   | 0.531926795 | $\omega_1 = 0.100$ (100%)       |                           |
| Haplophyton_crooksii                  |   | 8.669213708 | $\omega_1 = 0.00$ (97%)         | $\omega_2 = 2.85$ (2.7%)  |
| Gelsemium_sempervirens_32_dhs_exon1-7 |   | 0.930281604 | $\omega_1 = 0.00556$ (94%)      | $\omega_2 = 1.40$ (5.7%)  |
| root                                  |   | 0           | $\omega_1 = 0$                  |                           |
| 1                                     |   | 0           | $\omega_1 = 0$                  |                           |
| 2                                     |   | 0.256345726 | $\omega_1 = 0.115$ (99%)        | $\omega_2 = 28.9$ (1.4%)  |
| 3                                     |   | 14.22657998 | $\omega_1 = 0.0969$ (100%)      |                           |
| 4                                     |   | 1.992565036 | $\omega_1 = 0.00363$ (100%)     |                           |
| 5                                     |   | 0           | $\omega_1 = 10000000000$ (100%) |                           |
| 6                                     | A | 0.01496363  | $\omega_1 = 0.821$ (100%)       |                           |
| 7                                     |   | 0.046651572 | $\omega_1 = 0.395$ (100%)       |                           |
| 8                                     |   | 0.394800967 | $\omega_1 = 0.138$ (100%)       |                           |
| 9                                     |   | 0.191187825 | $\omega_1 = 0.134$ (100%)       |                           |
| 10                                    |   | 0.700412273 | $\omega_1 = 0.125$ (100%)       |                           |
| 11                                    | B | 0.172526429 | $\omega_1 = 0.235$ (100%)       |                           |
| 12                                    |   | 0.733136514 | $\omega_1 = 0.125$ (100%)       |                           |
| 13                                    |   | 0.795005809 | $\omega_1 = 1.00$ (100%)        |                           |
| 14                                    |   | 0.061413062 | $\omega_1 = 0.221$ (100%)       |                           |
| 15                                    | C | 0.12037927  | $\omega_1 = 0.249$ (98%)        | $\omega_2 = 19.1$ (2.3%)  |
| 16                                    |   | 1.066939268 | $\omega_1 = 0.0576$ (100%)      |                           |
| 17                                    |   | 1.267364291 | $\omega_1 = 0.0383$ (100%)      |                           |
| 18                                    |   | 1.587229847 | $\omega_1 = 0.0367$ (100%)      |                           |
| 19                                    |   | 2.457148449 | $\omega_1 = 0.00$ (100%)        |                           |
| 20                                    |   | 0.693325874 | $\omega_1 = 0.0906$ (100%)      |                           |
| 21                                    |   | 2.707099228 | $\omega_1 = 0.00$ (100%)        |                           |
| 26                                    |   | 2.713624442 | $\omega_1 = 0.00$ (100%)        |                           |
| 30                                    |   | 31.04985636 | $\omega_1 = 0.00$ (99%)         | $\omega_2 = 142$ (0.91%)  |
| 31                                    |   | 0.446373693 | $\omega_1 = 0.133$ (100%)       |                           |
| 32                                    |   | 0.192998589 | $\omega_1 = 0.212$ (100%)       |                           |

|    |   |             |                                 |                                  |
|----|---|-------------|---------------------------------|----------------------------------|
| 36 |   | 0.535210162 | $\omega_1 = 0.132$ (100%)       |                                  |
| 37 |   | 0.969595951 | $\omega_1 = 0.0594$ (100%)      |                                  |
| 41 |   | 2.706178456 | $\omega_1 = 0.00$ (100%)        |                                  |
| 42 |   | 0.185069594 | $\omega_1 = 0.249$ (100%)       |                                  |
| 43 |   | 0.293109361 | $\omega_1 = 0.209$ (100%)       |                                  |
| 44 |   | 0.128555392 | $\omega_1 = 0.296$ (100%)       |                                  |
| 47 |   | 0.53587278  | $\omega_1 = 0.120$ (100%)       |                                  |
| 52 |   | 0.004331817 | $\omega_1 = 0.967$ (100%)       |                                  |
| 53 |   | 0.786024446 | $\omega_1 = 1.00$ (100%)        |                                  |
| 57 |   | 2.698937574 | $\omega_1 = 0.00$ (100%)        |                                  |
| 58 |   | 1.538928943 | $\omega_1 = 0.0479$ (100%)      |                                  |
| 59 |   | 2.702330079 | $\omega_1 = 0.00$ (100%)        |                                  |
| 60 |   | 0.134562523 | $\omega_1 = 0.230$ (100%)       |                                  |
| 64 |   | 25.49018761 | $\omega_1 = 0.00$ (100%)        | $\omega_2 = 10000000000$ (0.42%) |
| 68 |   | 0.178743887 | $\omega_1 = 0.206$ (100%)       |                                  |
| 71 |   | 2.731651223 | $\omega_1 = 0.00$ (100%)        |                                  |
| 72 | E | 2.695372929 | $\omega_1 = 0.00$ (100%)        |                                  |
| 73 |   | 0           | $\omega_1 = 10000000000$ (100%) |                                  |
| 74 | D | 0.230408577 | $\omega_1 = 0.133$ (100%)       |                                  |
| 75 |   | 0           | $\omega_1 = 10000000000$ (100%) |                                  |
| 76 |   | 0           | $\omega_1 = 10000000000$ (100%) |                                  |
| 80 |   | 2.702941544 | $\omega_1 = 0.00$ (100%)        |                                  |
| 84 |   | 0.001234035 | $\omega_1 = 0.895$ (100%)       |                                  |
| 85 |   | 0           | $\omega_1 = 10000000000$ (100%) |                                  |
| 86 |   | 16.35510144 | $\omega_1 = 0.0752$ (100%)      |                                  |
| 87 |   | 0.805216214 | $\omega_1 = 1.00$ (100%)        |                                  |
| 88 |   | 0.409941694 | $\omega_1 = 0.139$ (100%)       |                                  |
| 89 |   | 2.707426633 | $\omega_1 = 0.00$ (100%)        |                                  |
| 90 |   | 0.794047732 | $\omega_1 = 1.00$ (100%)        |                                  |

|     |   |             |                                 |                                  |
|-----|---|-------------|---------------------------------|----------------------------------|
| 96  |   | 0.881340574 | $\omega_1 = 0.0685$ (100%)      |                                  |
| 97  |   | 0.272248835 | $\omega_1 = 0.180$ (100%)       |                                  |
| 101 |   | 0.081440037 | $\omega_1 = 0.272$ (99%)        | $\omega_2 = 543$ (0.68%)         |
| 104 |   | 0.920440187 | $\omega_1 = 0.0366$ (100%)      |                                  |
| 108 |   | 2.561733105 | $\omega_1 = 0.00$ (100%)        |                                  |
| 111 |   | 0.363534481 | $\omega_1 = 0.129$ (100%)       |                                  |
| 112 |   | 0.467666279 | $\omega_1 = 0.127$ (100%)       |                                  |
| 113 |   | 2.695881061 | $\omega_1 = 0.120$ (100%)       |                                  |
| 114 |   | 2.705269844 | $\omega_1 = 0.00$ (100%)        |                                  |
| 120 | L | 17.31878669 | $\omega_1 = 0.0972$ (100%)      |                                  |
| 121 |   | 0.310925251 | $\omega_1 = 0.0595$ (99%)       | $\omega_2 = 141$ (0.80%)         |
| 122 |   | 0.658699037 | $\omega_1 = 0.00824$ (95%)      | $\omega_2 = 2.23$ (4.9%)         |
| 123 |   | 1.213409762 | $\omega_1 = 0.0414$ (100%)      |                                  |
| 124 |   | 0.357819453 | $\omega_1 = 0.161$ (100%)       |                                  |
| 125 |   | 2.714161048 | $\omega_1 = 0.00$ (100%)        |                                  |
| 126 |   | 50          | $\omega_1 = 0.00$ (100%)        | $\omega_2 = 2810$ (0.32%)        |
| 127 |   | 2.712376565 | $\omega_1 = 0.106$ (100%)       |                                  |
| 128 |   | 0.504143192 | $\omega_1 = 0.118$ (100%)       |                                  |
| 129 | J | 23.70591721 | $\omega_1 = 0.603$ (100%)       |                                  |
| 130 |   | 0           | $\omega_1 = 0.727$ (100%)       |                                  |
| 131 |   | 0.275789734 | $\omega_1 = 0.179$ (100%)       |                                  |
| 132 |   | 0.887300818 | $\omega_1 = 10000000000$ (100%) |                                  |
| 133 |   | 2.720852498 | $\omega_1 = 0.00$ (100%)        |                                  |
| 134 |   | 0.873219837 | $\omega_1 = 1.00$ (100%)        |                                  |
| 135 |   | 2.765004537 | $\omega_1 = 0.00$ (100%)        |                                  |
| 136 |   | 0           | $\omega_1 = 10000000000$ (100%) |                                  |
| 137 |   | 29.02747021 | $\omega_1 = 0.00$ (99%)         | $\omega_2 = 254$ (0.74%)         |
| 143 |   | 0.024157018 | $\omega_1 = 0.740$ (100%)       |                                  |
| 144 |   | 2.705756398 | $\omega_1 = 0.00$ (100%)        |                                  |
| 145 |   | 24.20813544 | $\omega_1 = 0.00$ (100%)        | $\omega_2 = 10000000000$ (0.31%) |
| 150 |   | 0.433884715 | $\omega_1 = 0.134$ (100%)       |                                  |

|     |   |             |                                  |                            |
|-----|---|-------------|----------------------------------|----------------------------|
| 153 |   | 46.20373993 | $\omega_1 = 10000000000 (100\%)$ |                            |
| 156 |   | 0.846610998 | $\omega_1 = 0.00 (100\%)$        |                            |
| 157 |   | 0.841382336 | $\omega_1 = 1.00 (100\%)$        |                            |
| 158 |   | 0.091846259 | $\omega_1 = 0.372 (100\%)$       |                            |
| 159 |   | 0           | $\omega_1 = 0.967 (100\%)$       |                            |
| 163 |   | 0.721746737 | $\omega_1 = 0.0881 (100\%)$      |                            |
| 166 |   | 2.723168437 | $\omega_1 = 0.00 (100\%)$        |                            |
| 169 |   | 2.694988483 | $\omega_1 = 0.691 (100\%)$       |                            |
| 170 |   | 0.080707405 | $\omega_1 = 0.401 (100\%)$       |                            |
| 176 |   | 1.236039481 | $\omega_1 = 0.0437 (100\%)$      |                            |
| 179 |   | 2.696477331 | $\omega_1 = 0.00 (100\%)$        |                            |
| 180 |   | 2.706012089 | $\omega_1 = 0.00 (100\%)$        |                            |
| 181 |   | 1.135869764 | $\omega_1 = 0.0492 (100\%)$      |                            |
| 184 |   | 2.704981765 | $\omega_1 = 0.00 (100\%)$        |                            |
| 187 |   | 2.714229849 | $\omega_1 = 0.00 (100\%)$        |                            |
| 189 |   | 12.7988903  | $\omega_1 = 0.0934 (100\%)$      |                            |
| 192 |   | 0.803635955 | $\omega_1 = 1.00 (100\%)$        |                            |
| 194 |   | 0           | $\omega_1 = 10000000000 (100\%)$ |                            |
| 195 |   | 2.723878194 | $\omega_1 = 0.00 (100\%)$        |                            |
| 199 | I | 0.3396636   | $\omega_1 = 0.00 (95\%)$         | $\omega_2 = 3.31 (4.9\%)$  |
| 200 |   | 0.389003801 | $\omega_1 = 0.132 (100\%)$       |                            |
| 201 |   | 0.012656796 | $\omega_1 = 0.979 (100\%)$       | $\omega_2 = 2780 (0.35\%)$ |
| 202 |   | 0.156936172 | $\omega_1 = 0.246 (100\%)$       |                            |
| 210 |   | 0.420526786 | $\omega_1 = 0.138 (100\%)$       |                            |
| 211 |   | 0.088496885 | $\omega_1 = 0.363 (100\%)$       |                            |
| 215 | F | 30.84621644 | $\omega_1 = 0.00 (99\%)$         | $\omega_2 = 152 (1.5\%)$   |
| 216 |   | 0           | $\omega_1 = 0.800 (100\%)$       |                            |
| 217 |   | 13.9791336  | $\omega_1 = 0.0961 (100\%)$      |                            |
| 218 |   | 0.36600493  | $\omega_1 = 0.145 (100\%)$       |                            |
| 219 |   | 2.717456686 | $\omega_1 = 0.00 (100\%)$        |                            |
| 226 | B | 0.087426422 | $\omega_1 = 0.339 (100\%)$       |                            |
| 228 |   | 0.173294386 | $\omega_1 = 0.143 (98\%)$        | $\omega_2 = 12.9 (1.8\%)$  |
| 229 | K | 0.098198039 | $\omega_1 = 0.353 (99\%)$        | $\omega_2 = 61.4 (0.54\%)$ |



|     |   |             |                                 |                           |
|-----|---|-------------|---------------------------------|---------------------------|
| 233 |   | 0.29306355  | $\omega_1 = 0.176$ (100%)       |                           |
| 234 | H | 0.0934698   | $\omega_1 = 0.187$ (100%)       |                           |
| 235 |   | 2.708182091 | $\omega_1 = 0.00$ (100%)        |                           |
| 236 |   | 2.717879901 | $\omega_1 = 0.00$ (100%)        |                           |
| 237 |   | 2.743241408 | $\omega_1 = 0.00$ (100%)        |                           |
| 238 |   | 0.097132687 | $\omega_1 = 0.377$ (100%)       |                           |
| 239 |   | 2.706588615 | $\omega_1 = 0.00$ (100%)        |                           |
| 240 |   | 2.760597615 | $\omega_1 = 0.00$ (100%)        |                           |
| 241 |   | 0.115124673 | $\omega_1 = 0.324$ (100%)       |                           |
| 242 |   | 2.706078562 | $\omega_1 = 0.00$ (100%)        |                           |
| 243 |   | 0.822630551 | $\omega_1 = 0.0482$ (100%)      |                           |
| 244 |   | 0.061862696 | $\omega_1 = 0.391$ (100%)       |                           |
| 245 |   | 20.23516287 | $\omega_1 = 0.0371$ (100%)      |                           |
| 246 |   | 0.180450356 | $\omega_1 = 0.238$ (100%)       |                           |
| 247 |   | 0.383070895 | $\omega_1 = 0.145$ (100%)       |                           |
| 248 |   | 2.700239024 | $\omega_1 = 0.00$ (100%)        |                           |
| 249 |   | 0           | $\omega_1 = 10000000000$ (100%) |                           |
| 253 |   | 2.699699953 | $\omega_1 = 0.00$ (100%)        |                           |
| 254 |   | 0.783023384 | $\omega_1 = 0.941$ (99%)        | $\omega_2 = 5000$ (0.87%) |
| 260 |   | 0.088716662 | $\omega_1 = 0.388$ (100%)       |                           |
| 261 |   | 2.716166889 | $\omega_1 = 0.00$ (100%)        |                           |
| 265 |   | 0.215300585 | $\omega_1 = 0.209$ (100%)       |                           |
| 266 |   | 2.763893941 | $\omega_1 = 0.00$ (100%)        |                           |
| 267 |   | 2.70020589  | $\omega_1 = 0.00$ (100%)        |                           |
| 268 |   | 2.69912909  | $\omega_1 = 0.00$ (100%)        |                           |
| 269 |   | 0.157604781 | $\omega_1 = 0.252$ (100%)       |                           |
| 276 |   | 0.11490688  | $\omega_1 = 0.106$ (100%)       |                           |
| 278 |   | 2.702800893 | $\omega_1 = 0.00$ (100%)        |                           |
| 281 |   | 2.709293705 | $\omega_1 = 0.00$ (100%)        |                           |
| 282 |   | 0.129628321 | $\omega_1 = 0.282$ (100%)       |                           |
| 283 |   | 0.062805326 | $\omega_1 = 0.476$ (100%)       |                           |
| 284 |   | 1.46019584  | $\omega_1 = 0.0341$ (100%)      |                           |
| 290 |   | 0.06572342  | $\omega_1 = 0.461$ (100%)       |                           |

|     |             |                                 |                          |
|-----|-------------|---------------------------------|--------------------------|
| 293 | 0.621364762 | $\omega_1 = 0.100$ (100%)       |                          |
| 294 | 0.031241919 | $\omega_1 = 0.932$ (100%)       |                          |
| 295 | 2.703762038 | $\omega_1 = 0.00$ (100%)        |                          |
| 296 | 2.718189514 | $\omega_1 = 0.00$ (100%)        |                          |
| 297 | 0.799592389 | $\omega_1 = 0.0839$ (100%)      |                          |
| 298 | 2.700478545 | $\omega_1 = 0.00$ (100%)        |                          |
| 299 | 2.655761309 | $\omega_1 = 0.00$ (100%)        |                          |
| 300 | 0           | $\omega_1 = 1.01$ (100%)        |                          |
| 301 | 0.060545496 | $\omega_1 = 0.321$ (100%)       |                          |
| 302 | 2.714427169 | $\omega_1 = 0.00$ (100%)        |                          |
| 303 | 2.675157282 | $\omega_1 = 0.00$ (100%)        |                          |
| 311 | 2.713145004 | $\omega_1 = 0.00$ (100%)        |                          |
| 312 | 19.37479476 | $\omega_1 = 0.197$ (100%)       |                          |
| 315 | 1.216432974 | $\omega_1 = 0.0520$ (100%)      |                          |
| 318 | 0.412201959 | $\omega_1 = 0.117$ (100%)       |                          |
| 319 | 0           | $\omega_1 = 10000000000$ (100%) |                          |
| 320 | 2.736496482 | $\omega_1 = 0.00$ (100%)        |                          |
| 321 | 0.027474318 | $\omega_1 = 0.707$ (100%)       |                          |
| 326 | 2.714452146 | $\omega_1 = 0.00$ (100%)        |                          |
| 330 | 0.362066011 | $\omega_1 = 0.146$ (100%)       |                          |
| 331 | 1.231957685 | $\omega_1 = 0.0440$ (100%)      |                          |
| 335 | 2.70109811  | $\omega_1 = 0.00$ (100%)        |                          |
| 336 | 19.66296199 | $\omega_1 = 0.0614$ (99%)       | $\omega_2 = 366$ (0.67%) |
| 337 | 0.174402663 | $\omega_1 = 0.231$ (100%)       |                          |
| 341 | 0.529962955 | $\omega_1 = 0.112$ (100%)       |                          |
| 344 | 0.16194281  | $\omega_1 = 0.274$ (100%)       |                          |
| 345 | 0.653353388 | $\omega_1 = 0.0931$ (100%)      |                          |
| 346 | 0.63114084  | $\omega_1 = 0.120$ (100%)       |                          |
| 347 | 1.399081845 | $\omega_1 = 0.0347$ (100%)      |                          |
| 348 | 0.074546051 | $\omega_1 = 0.251$ (100%)       |                          |
| 349 | 1.493154161 | $\omega_1 = 0.0331$ (100%)      |                          |
| 350 | 26.75817335 | $\omega_1 = 0.0746$ (100%)      | $\omega_2 = 798$ (0.36%) |
| 351 | 0.47668514  | $\omega_1 = 0.118$ (100%)       |                          |

|     |             |                                 |                          |
|-----|-------------|---------------------------------|--------------------------|
| 352 | 0.199500725 | $\omega_1 = 0.179$ (100%)       |                          |
| 353 | 2.699880746 | $\omega_1 = 0.00$ (100%)        |                          |
| 354 | 0.878741344 | $\omega_1 = 1.00$ (100%)        |                          |
| 355 | 0.890939368 | $\omega_1 = 1.00$ (100%)        |                          |
| 356 | 2.7163264   | $\omega_1 = 0.00$ (100%)        |                          |
| 361 | 0.281674507 | $\omega_1 = 0.178$ (100%)       |                          |
| 362 | 0.886788652 | $\omega_1 = 1.00$ (100%)        |                          |
| 363 | 0.902378918 | $\omega_1 = 1.00$ (100%)        |                          |
| 368 | 2.69680295  | $\omega_1 = 0.00$ (100%)        |                          |
| 369 | 0           | $\omega_1 = 10000000000$ (100%) |                          |
| 373 | 2.699659807 | $\omega_1 = 0.00$ (100%)        |                          |
| 374 | 0.053127506 | $\omega_1 = 0.528$ (100%)       |                          |
| 375 | 0.086458189 | $\omega_1 = 0.392$ (100%)       |                          |
| 379 | 0.861714588 | $\omega_1 = 1.00$ (100%)        |                          |
| 382 | 0           | $\omega_1 = 10000000000$ (100%) |                          |
| 383 | 0.870986385 | $\omega_1 = 1.00$ (100%)        |                          |
| 384 | 0.170263435 | $\omega_1 = 0.119$ (100%)       |                          |
| 387 | 0.278700285 | $\omega_1 = 0.179$ (100%)       |                          |
| 390 | 0.170438092 | $\omega_1 = 0.238$ (100%)       |                          |
| 391 | 0.08772365  | $\omega_1 = 0.381$ (100%)       |                          |
| 395 | 14.38418574 | $\omega_1 = 0.00$ (99%)         | $\omega_2 = 15.0$ (1.0%) |
| 396 | 0.312375057 | $\omega_1 = 0.203$ (100%)       |                          |
| 397 | 2.723959963 | $\omega_1 = 0.00$ (100%)        |                          |
| 398 | 0.161607525 | $\omega_1 = 0.191$ (100%)       |                          |
| 403 | 0.929253526 | $\omega_1 = 0.0597$ (100%)      |                          |
| 404 | 0.42563369  | $\omega_1 = 0.102$ (100%)       |                          |
| 410 | 2.690552703 | $\omega_1 = 0.00$ (100%)        |                          |
| 411 | 0.175441925 | $\omega_1 = 0.216$ (100%)       |                          |
| 415 | 0.550586254 | $\omega_1 = 0.0927$ (100%)      |                          |
| 416 | 0.231314312 | $\omega_1 = 0.185$ (100%)       |                          |
| 417 | 2.718878874 | $\omega_1 = 0.00$ (100%)        |                          |
| 418 | 2.717605338 | $\omega_1 = 0.00$ (100%)        |                          |

|     |             |                                 |                          |
|-----|-------------|---------------------------------|--------------------------|
| 419 | 2.699242267 | $\omega_1 = 0.00$ (100%)        |                          |
| 422 | 0.289131641 | $\omega_1 = 0.175$ (100%)       |                          |
| 429 | 0.51553221  | $\omega_1 = 0.0797$ (100%)      |                          |
| 430 | 2.716190595 | $\omega_1 = 0.00$ (100%)        |                          |
| 431 | 2.728756498 | $\omega_1 = 0.00$ (100%)        |                          |
| 432 | 2.694095257 | $\omega_1 = 0.00$ (100%)        |                          |
| 433 | 0.793089244 | $\omega_1 = 1.00$ (100%)        |                          |
| 435 | 0.293636086 | $\omega_1 = 0.173$ (100%)       |                          |
| 438 | 2.706018401 | $\omega_1 = 0.00$ (100%)        |                          |
| 441 | 0.603799348 | $\omega_1 = 0.105$ (100%)       |                          |
| 445 | 2.739248061 | $\omega_1 = 0.00$ (100%)        |                          |
| 446 | 0.865846292 | $\omega_1 = 0.0779$ (100%)      |                          |
| 450 | 2.53253041  | $\omega_1 = 0.00$ (100%)        |                          |
| 453 | 0.676414947 | $\omega_1 = 0.103$ (100%)       |                          |
| 454 | 0.498489038 | $\omega_1 = 0.123$ (100%)       |                          |
| 458 | 2.715051369 | $\omega_1 = 0.00$ (100%)        |                          |
| 459 | 0.144313922 | $\omega_1 = 0.216$ (100%)       |                          |
| 460 | 0.152813587 | $\omega_1 = 0.249$ (100%)       |                          |
| 465 | 0.169981666 | $\omega_1 = 0.165$ (100%)       |                          |
| 466 | 28.48740621 | $\omega_1 = 0.00$ (100%)        | $\omega_2 = 660$ (0.31%) |
| 467 | 0.805895868 | $\omega_1 = 1.00$ (100%)        |                          |
| 468 | 2.699551598 | $\omega_1 = 0.00$ (100%)        |                          |
| 469 | 2.714695726 | $\omega_1 = 0.00$ (100%)        |                          |
| 476 | 0.25375446  | $\omega_1 = 0.00$ (91%)         | $\omega_2 = 2.41$ (9.0%) |
| 477 | 46.8168212  | $\omega_1 = 0.00$ (99%)         | $\omega_2 = 462$ (1.4%)  |
| 478 | 0.804230343 | $\omega_1 = 1.00$ (100%)        |                          |
| 482 | 0.255001358 | $\omega_1 = 0.192$ (100%)       |                          |
| 485 | 0           | $\omega_1 = 10000000000$ (100%) |                          |
| 486 | 0.165319261 | $\omega_1 = 0.209$ (100%)       |                          |
| 487 | 2.709265129 | $\omega_1 = 0.00$ (100%)        |                          |
| 488 | 2.717728661 | $\omega_1 = 0.00$ (100%)        |                          |
| 489 | 0.094599394 | $\omega_1 = 0.352$ (100%)       |                          |

|     |             |                                 |                          |
|-----|-------------|---------------------------------|--------------------------|
| 490 | 0.174272055 | $\omega_1 = 0.219$ (100%)       |                          |
| 491 | 2.717451085 | $\omega_1 = 0.00$ (100%)        |                          |
| 492 | 2.787038071 | $\omega_1 = 0.00$ (100%)        |                          |
| 493 | 0           | $\omega_1 = 0.00$ (98%)         | $\omega_2 = 1130$ (1.8%) |
| 494 | 14.01330898 | $\omega_1 = 0.0612$ (100%)      |                          |
| 495 | 0           | $\omega_1 = 1.00$ (100%)        |                          |
| 496 | 2.70453986  | $\omega_1 = 0.00$ (100%)        |                          |
| 497 | 0.536250333 | $\omega_1 = 0.115$ (100%)       |                          |
| 504 | 0.920849389 | $\omega_1 = 0.0623$ (100%)      |                          |
| 505 | 2.72714086  | $\omega_1 = 0.00$ (100%)        |                          |
| 509 | 0.421331947 | $\omega_1 = 0.106$ (100%)       |                          |
| 512 | 0.670008464 | $\omega_1 = 0.0997$ (100%)      |                          |
| 516 | 2.721808751 | $\omega_1 = 0.00$ (100%)        |                          |
| 520 | 0.424685114 | $\omega_1 = 0.124$ (100%)       |                          |
| 521 | 0.079807427 | $\omega_1 = 0.387$ (100%)       |                          |
| 522 | 0.312572394 | $\omega_1 = 0.169$ (100%)       |                          |
| 526 | 0.104527628 | $\omega_1 = 0.519$ (100%)       |                          |
| 529 | 0           | $\omega_1 = 10000000000$ (100%) |                          |
| 530 | 0.787431354 | $\omega_1 = 0.00$ (100%)        |                          |
| 533 | 0.45994012  | $\omega_1 = 0.134$ (100%)       |                          |
| 534 | 0.087806497 | $\omega_1 = 0.379$ (100%)       |                          |
| 538 | 0.548135717 | $\omega_1 = 0.00$ (100%)        |                          |
| 539 | 0.243231078 | $\omega_1 = 0.148$ (100%)       |                          |
| 540 | 1.633388729 | $\omega_1 = 0.0303$ (100%)      |                          |
| 541 | 0.105047961 | $\omega_1 = 0.339$ (100%)       |                          |

**Table S10:** aBSREL  $\omega$  rates and distributions over sites and RELAX general descriptive k for reduced dataset tree topology (Fig. 4). Node numbers are displayed in Fig. S8.

| Node #/sequence name (Fig. S8)              | Branch label (Figs. 3, 4) | k           | $\omega$ 1 rate distribution over sites (% sites) | $\omega$ 2 rate distribution over sites (% sites) |
|---------------------------------------------|---------------------------|-------------|---------------------------------------------------|---------------------------------------------------|
| Echites_umbellatus_PA74_hss_exon1-7         |                           | 3.333975395 | $\omega$ 1 = 0.00 (100%)                          |                                                   |
| Echites_umbellatus_PA86_hss_exon1-7         |                           | 1.060987288 | $\omega$ 1 = 1.00 (100%)                          |                                                   |
| Echites_umbellatus_PA76_hss2_contig1-7      |                           | 0           | $\omega$ 1 = 10000000000 (100%)                   |                                                   |
| Echites_umbellatus_PA76_hss1_contig1-7      |                           | 1.004109789 | $\omega$ 1 = 1.00 (100%)                          |                                                   |
| Echites_umbellatus_1                        |                           | 0           | $\omega$ 1 = 10000000000 (100%)                   |                                                   |
| Echites_umbellatus_2                        |                           | 0.775165835 | $\omega$ 1 = 0.0956 (100%)                        |                                                   |
| Echites_turriger_TLA137_hss_exon1-7         |                           | 1.272215828 | $\omega$ 1 = 0.0506 (100%)                        |                                                   |
| Prestonia_coalita_2                         |                           | 0.341399431 | $\omega$ 1 = 0.150 (100%)                         |                                                   |
| Prestonia_coalita_1                         |                           | 0.43043946  | $\omega$ 1 = 0.170 (100%)                         |                                                   |
| Prestonia_portobellensis_51_hss_exon1-7     |                           | 1.470196149 | $\omega$ 1 = 0.0403 (100%)                        |                                                   |
| Parsonsia_eucalyptophylla_1                 |                           | 3.349581733 | $\omega$ 1 = 0.00 (100%)                          |                                                   |
| Parsonsia_eucalyptophylla_A2                |                           | 0.102341052 | $\omega$ 1 = 0.340 (100%)                         |                                                   |
| Parsonsia_alboflavescens_PA90_hss_exon1-7   |                           | 3.323795747 | $\omega$ 1 = 0.00 (100%)                          |                                                   |
| Macropharynx_spectabilis_TL210_hss_exon1-7  |                           | 1.523095879 | $\omega$ 1 = 0.0391 (100%)                        |                                                   |
| Macropharynx_peltata_49_hss_exon1-7         |                           | 0           | $\omega$ 1 = 1.48 (100%)                          |                                                   |
| Rhodocalyx_rotundifolius_PA109b_hss_exon1-7 |                           | 10.92035644 | $\omega$ 1 = 0.0499 (100%)                        |                                                   |
| Rhodocalyx_riedelii_TL205_hss_exon1-7       |                           | 0.129864424 | $\omega$ 1 = 0.291 (100%)                         |                                                   |
| Temnadenia_odorifera_TL213_hss_exon1-7      |                           | 0.726686573 | $\omega$ 1 = 0.0788 (100%)                        |                                                   |
| Laubertia_boissieri_TL220_hss_exon1-7       |                           | 1.117087651 | $\omega$ 1 = 0.0471 (99%)                         | $\omega$ 2 = 21.1 (0.80%)                         |
| Stipecoma_peltigera_TLA134_hss_exon1-6      |                           | 0.5259512   | $\omega$ 1 = 0.0959 (100%)                        |                                                   |
| Secondatia_densiflora_PA62B_hss_exon1-7     |                           | 1.388174741 | $\omega$ 1 = 0.0290 (100%)                        |                                                   |
| Odontadenia_perrottetii_PA60B_hss_exon1-7   |                           | 15.84232114 | $\omega$ 1 = 0.00248 (99%)                        | $\omega$ 2 = 20.1 (0.71%)                         |
| Mandevilla_longiflora                       |                           | 0.322758062 | $\omega$ 1 = 0.169 (100%)                         |                                                   |
| Mandevilla_boliviensis_TLA76_hss_exon1-7    |                           | 0.174910014 | $\omega$ 1 = 0.210 (100%)                         |                                                   |
| Forsteronia_guyanensis_TLA39_hss_exon1-7    |                           | 0.922347757 | $\omega$ 1 = 0.0813 (100%)                        |                                                   |
| Mesechites_trifidus_45_hss_exon1-7          |                           | 0.559581358 | $\omega$ 1 = 0.0964 (100%)                        |                                                   |
| Allomarkgrafia_brenesiana_PA98_hss_exon1-7  |                           | 3.350740333 | $\omega$ 1 = 0.00 (100%)                          |                                                   |
| Pinochia_corymbosa_TL96_hss_exon1-7         |                           | 0.192124176 | $\omega$ 1 = 0.191 (100%)                         |                                                   |
| Elytropus_chilensis_TLA257_hss_exon1-7      |                           | 0.999808354 | $\omega$ 1 = 1.00 (100%)                          |                                                   |
| Elytropus_chilensis_TL208_hss_exon1-6       |                           | 0.999808354 | $\omega$ 1 = 1.00 (100%)                          |                                                   |

|                                             |             |                            |                          |
|---------------------------------------------|-------------|----------------------------|--------------------------|
| Epigynum_cochinchinensis_TLA62_hss_exon1-6  | 16.81246035 | $\omega_1 = 0.117$ (100%)  |                          |
| Ichnocarpus_frutescens_TL621_hss_exon1-6    | 0.453267731 | $\omega_1 = 0.0930$ (100%) |                          |
| Aganosma_schlechteriana_TLA24_hss_exon1-7   | 0.256086017 | $\omega_1 = 0.194$ (100%)  |                          |
| Epigynum_griffithianum_TLA195_hss_exon1-6   | 3.423617395 | $\omega_1 = 0.00$ (100%)   |                          |
| Amalocalyx_microlobus_TLA272_hss_exon1-6    | 0.580171703 | $\omega_1 = 0.121$ (100%)  |                          |
| Trachelospermum_axillare_TLA84_hss_exon2-7  | 3.337009822 | $\omega_1 = 0.00$ (100%)   |                          |
| Trachelospermum_asiaticum_PA66B_hss_exon1-7 | 0.097262055 | $\omega_1 = 0.356$ (100%)  |                          |
| Chonemorpha_fragrans_TLA37_hss_exon1-7      | 0.164654312 | $\omega_1 = 0.236$ (100%)  |                          |
| Amphineurion_marginatum_55_hss_exon1-7      | 1.017690301 | $\omega_1 = 0.0515$ (100%) |                          |
| Eucorymbia_alba_PA104_hss_exon1-6           | 0.206311605 | $\omega_1 = 0.210$ (100%)  |                          |
| Beaumontia_murtonii_53_hss_exon1-6          | 0.156490668 | $\omega_1 = 0.257$ (100%)  |                          |
| Vallaris_solanacea_TLA90_hss_exon1-7        | 0.508600272 | $\omega_1 = 0.134$ (100%)  |                          |
| Papuechites_aambe_TLA130_hss_exon1-7        | 0.286689344 | $\omega_1 = 0.160$ (100%)  |                          |
| Anodendron_oblongifolium_PA100_hss2_exon3-7 | 0.999808354 | $\omega_1 = 0.00$ (100%)   |                          |
| Anodendron_affine_PA79_hss1_exon1-7         | 0.999808354 | $\omega_1 = 0.758$ (100%)  |                          |
| Anodendron_affine_PA79_hss2_exon1-7         | 0.405138149 | $\omega_1 = 0.0871$ (100%) |                          |
| Anodendron_oblongifolium_PA100_hss1_exon1-6 | 0           | $\omega_1 = 0.143$ (100%)  |                          |
| Anodendron_parviflorum_TLA135_hss_exon1-7   | 0.229176533 | $\omega_1 = 1.00$ (100%)   |                          |
| Streptoechites_chinensis_54_hss_exon1-6     | 0.18942696  | $\omega_1 = 0.212$ (100%)  |                          |
| Rhabdadenia_madida_TL206_hss_exon1-7        | 0.460546075 | $\omega_1 = 0.130$ (100%)  |                          |
| Rhabdadenia_biflora_1                       | 0.255485721 | $\omega_1 = 0.133$ (98%)   | $\omega_2 = 5000$ (1.6%) |
| Gymnanthera_oblonga_TLP274_hss_exon2-6      | 0.095717443 | $\omega_1 = 0.0863$ (100%) |                          |
| Finlaysonia_lanuginosa_TLP286_hss_exon1-7   | 0.171123625 | $\omega_1 = 0.129$ (100%)  |                          |
| Finlaysonia_insularum_TL63_hss_exon1-6      | 36.24913479 | $\omega_1 = 0.0694$ (100%) |                          |
| Raphionacme_flanaganii_P79_hss_exon1-6      | 0.311436914 | $\omega_1 = 0.202$ (100%)  |                          |
| Petopentia_natalensis_TLP78_hss_exon1-7     | 14.36209009 | $\omega_1 = 0.0876$ (100%) |                          |
| Gongronema_angolense_TL383_hss2_exon1-6     | 0.095843422 | $\omega_1 = 0.361$ (100%)  |                          |
| Gongronema_latifolium_TL381_hss2_exon1-6    | 0.457585475 | $\omega_1 = 0.144$ (100%)  |                          |
| Marsdenia_truncata_TL397_hss1_exon1-7       | 0.579281144 | $\omega_1 = 0.122$ (100%)  |                          |
| Gongronema_taylorii_TL377_hss_exon1-6       | 0.825240718 | $\omega_1 = 0.0897$ (100%) |                          |
| Gymnema_sylvestre_TL615_hss_exon1-6         | 0.312278633 | $\omega_1 = 0.174$ (100%)  |                          |
| Ruehssia_laxiflora_TLAsc225_hss_exon1-6     | 0.15954997  | $\omega_1 = 0.284$ (100%)  |                          |
| Ruehssia_macrophylla_TL226_hss2_exon1-7     | 0.153443795 | $\omega_1 = 0.254$ (100%)  |                          |
| Ruehssia_guaranitica_TLAsc227_hss_exon1-7   | 0.098906043 | $\omega_1 = 0.349$ (100%)  |                          |

|                                                |             |                            |                                  |
|------------------------------------------------|-------------|----------------------------|----------------------------------|
| Ruehssia_caatingae_PA111_hss2_exon1-6          | 0.469689676 | $\omega_1 = 0.141$ (100%)  |                                  |
| Stigmatorhynchus_umbellifer_TL394_hss1_exon1-6 | 0.030655849 | $\omega_1 = 0.00$ (100%)   |                                  |
| Gongronema_angolense_TL383_hss1_exon1-6        | 50          | $\omega_1 = 0.00$ (99%)    | $\omega_2 = 5000$ (0.63%)        |
| Jasminanthes_maingayi_PA85_hss2_exon1-6        | 0.300950083 | $\omega_1 = 0.176$ (100%)  |                                  |
| Marsdenia_longipedicellata_TL262_hss1_exon1-7  | 0.806967951 | $\omega_1 = 0.0635$ (100%) |                                  |
| Dischidia_albida_PA67bB_hss_exon1-6            | 0           | $\omega_1 = 1.03$ (100%)   |                                  |
| Dischidia_cleistantha_TLAsc401_hss_exon1-7     | 0.009331785 | $\omega_1 = 0.625$ (100%)  | $\omega_2 = 183$ (0.46%)         |
| Hoya_yuennanensis_TL238_hss_exon1-6            | 0.034322515 | $\omega_1 = 0.714$ (100%)  |                                  |
| Marsdenia_flavescens_TLAsc126_hss1_exon1-7     | 0.026901855 | $\omega_1 = 0.714$ (100%)  |                                  |
| Marsdenia_coronata_TLAsc118_hss_exon1-7        | 0.024430191 | $\omega_1 = 0.726$ (100%)  |                                  |
| Marsdenia_tinctoria_TL376_hss_exon1-7          | 0.079647499 | $\omega_1 = 0.353$ (100%)  |                                  |
| Marsdenia_glabra_TL99_hss_exon1-7              | 0.151622597 | $\omega_1 = 0.338$ (99%)   | $\omega_2 = 10000000000$ (0.65%) |
| Campestigma_purpureum_TL94_hss2_exon1-6        | 0.263795927 | $\omega_1 = 0.189$ (100%)  |                                  |
| Sarcolobus_cambogensis_TL628_hss2_exon1-6      | 0.716099803 | $\omega_1 = 0.101$ (100%)  |                                  |
| Lygisma_angustifolia_TL98_hss_exon1-7          | 0.689598267 | $\omega_1 = 0.108$ (100%)  |                                  |
| Jasminanthes_maingayi_PA85_hss3_exon1-6        | 0.095146817 | $\omega_1 = 0.355$ (100%)  |                                  |
| Anisopus_efulensis_TL386_hss_exon1-7           | 0.025298619 | $\omega_1 = 0.203$ (100%)  |                                  |
| Marsdenia_truncata_TL397_hss2_exon1-6          | 0.114507863 | $\omega_1 = 0.248$ (100%)  |                                  |
| Ruehssia_caatingae_PA111_hss1_exon1-6          | 30.00744563 | $\omega_1 = 0.00$ (98%)    | $\omega_2 = 99.8$ (1.7%)         |
| Ruehssia_macrophylla_TL226_hss1_exon1-6        | 0           | $\omega_1 = 0.894$ (100%)  |                                  |
| Campestigma_purpureum_TL94_hss1_exon1-6        | 0.122639168 | $\omega_1 = 0.210$ (100%)  |                                  |
| Sarcolobus_cambogensis_TL628_hss1_exon1-7      | 0.205523251 | $\omega_1 = 0.241$ (100%)  |                                  |
| Stigmatorhynchus_umbellifer_TL394_hss2_exon1-6 | 0.999044934 | $\omega_1 = 1.00$ (100%)   |                                  |
| Gongronema_angolense_TL383_hss4_exon1-6        | 0.097149177 | $\omega_1 = 1.00$ (100%)   |                                  |
| Gongronema_angolense_TL383_hss5_exon2-6        | 3.367549835 | $\omega_1 = 0.00$ (100%)   |                                  |
| Gongronema_angolense_TL383_hss3_exon2-6        | 0.091359062 | $\omega_1 = 0.375$ (100%)  |                                  |
| Gongronema_latifolium_TL381_hss1_exon1-7       | 0.12093841  | $\omega_1 = 0.00$ (97%)    | $\omega_2 = 17.6$ (3.5%)         |
| Marsdenia_longipedicellata_TL262_hss2_exon1-6  | 0.155264834 | $\omega_1 = 0.193$ (100%)  |                                  |
| Marsdenia_flavescens_TLAsc126_hss2_exon2-6     | 1.306548533 | $\omega_1 = 0.0499$ (100%) |                                  |
| Jasminanthes_maingayi_PA85_hss1_exon1-7        | 0           | $\omega_1 = 0.126$ (95%)   | $\omega_2 = 38.0$ (4.7%)         |
| Tassadia_berteroanum_PA34_hss_exon1-7          | 1.566313881 | $\omega_1 = 0.0364$ (100%) |                                  |
| Tassadia_propinqua_33_hss_exon3-7              | 0.128523393 | $\omega_1 = 0.288$ (100%)  |                                  |
| Peplonia_adnata_PA113_hss_exon1-7              | 0.126349805 | $\omega_1 = 0.00$ (87%)    | $\omega_2 = 3.30$ (13%)          |



|                                               |             |                                 |                           |
|-----------------------------------------------|-------------|---------------------------------|---------------------------|
| Diplolepis_geminiflora_36_hss_exon1-7         | 0           | $\omega_1 = 1.08$ (100%)        |                           |
| Calotropis_gigantea_hss                       | 0.772243798 | $\omega_1 = 0.104$ (100%)       |                           |
| Fockea_edulis_TL184_hss_exon1-7               | 0.705255144 | $\omega_1 = 0.104$ (100%)       |                           |
| Toxocarpus_villosus_TLS261_hss_exon1-7        | 0.66259472  | $\omega_1 = 0.114$ (100%)       |                           |
| Baissea_viridiflora_TL622_hss_exon1-6         | 0.209182194 | $\omega_1 = 0.144$ (100%)       |                           |
| Baissea_myrtifolia_TL638_hss_exon1-7          | 0.146954973 | $\omega_1 = 0.213$ (100%)       |                           |
| Oncinotis_glabrata_TL417_hss_exon1-7          | 0.50090867  | $\omega_1 = 0.0890$ (100%)      |                           |
| Malouetiella_mildbraedii_TLA246_hss_exon1-7   | 34.77913906 | $\omega_1 = 0.0889$ (100%)      |                           |
| Kibatalia_macrophylla_TLA18_hss_exon1-7       | 0.890168965 | $\omega_1 = 0.0825$ (100%)      |                           |
| Funtumia_elastica_TLA144_hss_exon1-7          | 15.16182911 | $\omega_1 = 0.00$ (100%)        | $\omega_2 = 30.3$ (0.37%) |
| Holarrhena_curtisii_TLA17_hss_exon1-7         | 0.099355267 | $\omega_1 = 0.329$ (100%)       |                           |
| Mascarenhasia_arborescens_TLA143_hss_exon1-7  | 0.415925164 | $\omega_1 = 0.139$ (100%)       |                           |
| Galactophora_schomburgkiana_PA87_hss_exon1-7  | 0.28476245  | $\omega_1 = 0.0774$ (95%)       | $\omega_2 = 4.32$ (4.7%)  |
| Alafia_barteri_52_hss_exon1-7                 | 0.812403084 | $\omega_1 = 0.0922$ (100%)      |                           |
| Alafia_thouarsii_TL216_hss_exon1-7            | 30.6692659  | $\omega_1 = 0.00$ (99%)         | $\omega_2 = 210$ (0.65%)  |
| Isonema_smeathmannii_TLA142_hss_exon1-6       | 0.249577476 | $\omega_1 = 0.0867$ (98%)       | $\omega_2 = 205$ (1.5%)   |
| Strophanthus_boivinii_TLA133_hss_exon1-7      | 0.270127209 | $\omega_1 = 0.0750$ (97%)       | $\omega_2 = 15.6$ (2.7%)  |
| Wrightia_arborea_TLA91_dhs2_exon1-7           | 0.61882512  | $\omega_1 = 0.00$ (100%)        |                           |
| Wrightia_lanceolata_TL103_dhs2_exon1-7        | 0           | $\omega_1 = 10000000000$ (100%) |                           |
| Stephanostema_stenocarpum_TLA232_dhs2_exon1-7 | 0.62349277  | $\omega_1 = 0.139$ (100%)       |                           |
| Wrightia_religiosa_TL104_dhs2_exon1-7         | 0.472156868 | $\omega_1 = 0.0892$ (100%)      |                           |
| Pleioceras_barteri_TLA244_dhs2_exon1-7        | 3.379202189 | $\omega_1 = 0.00$ (100%)        |                           |
| Wrightia_natalensis                           | 0.236288284 | $\omega_1 = 0.323$ (100%)       |                           |
| Ruehssia_macrophylla_TL226_dhs_exon1-7        | 0.147883828 | $\omega_1 = 0.268$ (100%)       |                           |
| Ruehssia_caatingae_PA111_dhs_exon1-7          | 0.612519503 | $\omega_1 = 0.118$ (100%)       |                           |
| Ruehssia_guaranitica_TLAAsc227_dhs_exon1-7    | 35.32054358 | $\omega_1 = 0.00$ (100%)        | $\omega_2 = 292$ (0.31%)  |
| Ruehssia_laxiflora_TLAAsc225_dhs_exon1-7      | 0.097648688 | $\omega_1 = 0.355$ (100%)       |                           |
| Gongronema_latifolium_TL381_dhs_exon1-7       | 0.026838455 | $\omega_1 = 0.709$ (100%)       |                           |
| Marsdenia_truncata_TL397_dhs_exon1-7          | 0.008827926 | $\omega_1 = 0.889$ (100%)       |                           |
| Marsdenia_longipedicellata_TL262_dhs_exon1-7  | 3.3674883   | $\omega_1 = 0.00$ (100%)        |                           |
| Gongronema_angolense_TL383_dhs_exon1-7        | 0.998282387 | $\omega_1 = 1.00$ (100%)        |                           |
| Jasminanthes_maingayi_PA85_dhs_exon1-7        | 0.072985835 | $\omega_1 = 0.357$ (100%)       |                           |
| Gymnema_sylvestre_TL615_dhs_exon1-7           | 0.179180828 | $\omega_1 = 0.234$ (100%)       |                           |

|                                                      |             |                                 |                          |
|------------------------------------------------------|-------------|---------------------------------|--------------------------|
| <i>Stigmatorhynchus_umbellifer_TL394_dhs_exon1-7</i> | 0.428296191 | $\omega_1 = 0.151$ (100%)       |                          |
| <i>Campestigma_purpureum_TL94_dhs_exon1-7</i>        | 0.852417728 | $\omega_1 = 0.0864$ (100%)      |                          |
| <i>Sarcolobus_cambogensis_TL628_dhs_exon1-7</i>      | 0.336668039 | $\omega_1 = 0.172$ (100%)       |                          |
| <i>Lygisma_angustifolia_TL98_dhs_exon1-7</i>         | 0.448161203 | $\omega_1 = 0.116$ (100%)       |                          |
| <i>Anisopus_efulensis_TL386_dhs_exon1-7</i>          | 3.334937811 | $\omega_1 = 0.143$ (100%)       |                          |
| <i>Gongronema_taylorii_TL377_dhs_exon1-7</i>         | 0.478198732 | $\omega_1 = 0.141$ (100%)       |                          |
| <i>Marsdenia_flavescens_TLAsc126_dhs_exon1-7</i>     | 0.15258709  | $\omega_1 = 0.174$ (100%)       |                          |
| <i>Marsdenia_coronata_TLAsc118_dhs_exon1-7</i>       | 3.368268077 | $\omega_1 = 0.00$ (100%)        |                          |
| <i>Marsdenia_tinctoria_TL376_dhs_exon1-7</i>         | 0           | $\omega_1 = 10000000000$ (100%) |                          |
| <i>Marsdenia_glabra_TL99_dhs_exon1-7</i>             | 0.145284826 | $\omega_1 = 0.268$ (100%)       |                          |
| <i>Dischidia_cleistantha_TLAsc401_dhs_exon1-7</i>    | 1.647143761 | $\omega_1 = 0.0358$ (100%)      |                          |
| <i>Dischidia_albida_PA67bB_dhs_exon1-7</i>           | 0.253962528 | $\omega_1 = 0.198$ (100%)       |                          |
| <i>Hoya_yuennanensis_TL238_dhs_exon1-7</i>           | 0.201458186 | $\omega_1 = 0.217$ (100%)       |                          |
| <i>Tassadia_berteroanum_PA34_dhs_exon1-7</i>         | 0.43980076  | $\omega_1 = 0.147$ (100%)       |                          |
| <i>Tassadia_propinqua_33_dhs_exon1-7</i>             | 0.452350463 | $\omega_1 = 0.0727$ (100%)      |                          |
| <i>Peplonia_adnata_PA113_dhs_exon1-7</i>             | 0.349827321 | $\omega_1 = 0.132$ (100%)       |                          |
| <i>Diplolepis_geminiflora_36_dhs_exon1-7</i>         | 0.198707056 | $\omega_1 = 0.162$ (100%)       |                          |
| <i>Asclepias_syriaca_2</i>                           | 3.336981729 | $\omega_1 = 0.00$ (100%)        |                          |
| <i>Asclepias_curassavica</i>                         | 0.08213162  | $\omega_1 = 0.0918$ (98%)       | $\omega_2 = 25.5$ (2.1%) |
| <i>Calotropis_gigantea_dhs</i>                       | 29.37215614 | $\omega_1 = 0.109$ (94%)        | $\omega_2 = 142$ (5.9%)  |
| <i>Fockea_edulis_TL184_dhs_exon1-7</i>               | 0.463903036 | $\omega_1 = 0.145$ (100%)       |                          |
| <i>Toxocarpus_villosus_TLS261_dhs_exon1-7</i>        | 0.552724149 | $\omega_1 = 0.0963$ (100%)      |                          |
| <i>Baiassea_myrtifolia_TL638_dhs_exon1-7</i>         | 0.13627688  | $\omega_1 = 0.274$ (100%)       |                          |
| <i>Baiassea_viridiflora_TL622_dhs_exon1-7</i>        | 1.300310461 | $\omega_1 = 0.0509$ (100%)      |                          |
| <i>Oncinotis_glabrata_TL417_dhs_exon1-7</i>          | 0.447444987 | $\omega_1 = 0.147$ (100%)       |                          |
| <i>Finlaysonia_lanuginosa_TLP286_dhs_exon1-7</i>     | 0.102623718 | $\omega_1 = 0.346$ (100%)       |                          |
| <i>Zygostelma_benthamii_TL105_dhs_exon1-7</i>        | 0.54263873  | $\omega_1 = 0.129$ (100%)       |                          |
| <i>Finlaysonia_insularum_TL63_dhs1_exon1-7</i>       | 3.334738816 | $\omega_1 = 0.00$ (100%)        |                          |
| <i>Finlaysonia_insularum_TL63_dhs2_exon1-7</i>       | 3.336966681 | $\omega_1 = 0.00$ (100%)        |                          |
| <i>Gymnanthera_oblonga_TLP274_dhs_exon1-6</i>        | 0.8442705   | $\omega_1 = 0.365$ (100%)       |                          |
| <i>Raphionacme_flanagani_P79_dhs_exon1-7</i>         | 0.74032973  | $\omega_1 = 0.100$ (100%)       |                          |
| <i>Petopentia_natalensis_TLP78_dhs_exon1-7</i>       | 1.047877458 | $\omega_1 = 0.0391$ (100%)      |                          |

|                                             |             |                                 |                           |
|---------------------------------------------|-------------|---------------------------------|---------------------------|
| Epigynum_auritum                            | 45.6874383  | $\omega_1 = 0.00$ (98%)         | $\omega_2 = 1690$ (2.1%)  |
| Aganosma_schlechteriana_TLA24_dhs_exon1-7   | 0.106268829 | $\omega_1 = 0.400$ (100%)       |                           |
| Epigynum_cochinchinensis_TLA62_dhs_exon1-7  | 3.336903426 | $\omega_1 = 0.00$ (100%)        |                           |
| Ichnocarpus_frutescens_TL621_dhs_exon1-7    | 0.317954228 | $\omega_1 = 0.177$ (100%)       |                           |
| Epigynum_griffithianum_TLA195_dhs_exon1-7   | 1.021318531 | $\omega_1 = 0.0700$ (100%)      |                           |
| Pottsia_laxiflora                           | 0.499821237 | $\omega_1 = 0.134$ (100%)       |                           |
| Chonemorpha_fragrans_TLA37_dhs_exon1-7      | 19.02699534 | $\omega_1 = 0.0915$ (100%)      |                           |
| Trachelospermum_axillare_TLA84_dhs_exon1-7  | 0.091340643 | $\omega_1 = 0.377$ (100%)       |                           |
| Trachelospermum_asiaticum_PA66B_dhs_exon1-7 | 1.449592971 | $\omega_1 = 0.0436$ (100%)      |                           |
| Amalocalyx_microlobus_TLA272_dhs_exon1-7    | 1.002573964 | $\omega_1 = 1.00$ (100%)        |                           |
| Amalocalyx_microlobus                       | 3.35001091  | $\omega_1 = 0.00$ (100%)        |                           |
| Apocynum_pictum_PA84_dhs_exon1-7            | 3.388124822 | $\omega_1 = 0.00$ (100%)        |                           |
| Apocynum_venetum_PA82_dhs_exon1-7           | 0.998282387 | $\omega_1 = 1.00$ (100%)        |                           |
| Apocynum_venetum_PA80_dhs_exon1-7           | 0           | $\omega_1 = 10000000000$ (100%) |                           |
| Apocynum_cannabinum_44_dhs_exon1-7          | 0           | $\omega_1 = 10000000000$ (100%) |                           |
| Apocynum_androsaemifolium                   | 0.629891087 | $\omega_1 = 0.117$ (100%)       |                           |
| Apocynum_androsaemifolium_TLA35_dhs_exon1-7 | 3.337938966 | $\omega_1 = 0.00$ (100%)        |                           |
| Streptoechites_chinensis_54_dhs_exon1-7     | 0.458986458 | $\omega_1 = 0.108$ (100%)       |                           |
| Eucorymbia_alba_PA104_dhs_exon1-7           | 0.654194257 | $\omega_1 = 0.111$ (100%)       |                           |
| Amphineurion_marginatum_55_dhs_exon1-7      | 0.503280628 | $\omega_1 = 0.136$ (100%)       |                           |
| Papuechites_aambe_TLA130_dhs_exon1-7        | 0.323461894 | $\omega_1 = 0.132$ (100%)       |                           |
| Anodendron_oblongifolium_PA100_dhs_exon1-7  | 3.339703029 | $\omega_1 = 1.00$ (100%)        |                           |
| Anodendron_affine_PA79_dhs_exon1-7          | 0.326120102 | $\omega_1 = 0.00$ (100%)        |                           |
| Anodendron_parviflorum_TLA135_dhs_exon1-7   | 0.469551394 | $\omega_1 = 10000000000$ (100%) |                           |
| Vallaris_solanacea_TLA90_dhs_exon1-7        | 1.340229533 | $\omega_1 = 0.0488$ (100%)      |                           |
| Beaumontia_murtonii_53_dhs_exon1-7          | 1.028704038 | $\omega_1 = 0.0700$ (100%)      |                           |
| Echites_umbellatus_PA76_dhs1_exon1-7        | 1.075689909 | $\omega_1 = 1.00$ (100%)        |                           |
| Echites_umbellatus_PA76_dhs2_exon1-7        | 3.359364075 | $\omega_1 = 0.00$ (100%)        |                           |
| Echites_umbellatus_PA86_dhs_exon1-7         | 0.10160641  | $\omega_1 = 0.350$ (100%)       |                           |
| Echites_umbellatus_4                        | 50          | $\omega_1 = 0.0540$ (99%)       | $\omega_2 = 5000$ (0.87%) |
| Echites_umbellatus_3                        | 1.02824629  | $\omega_1 = 1.00$ (100%)        |                           |
| Echites_umbellatus_PA74_dhs_exon1-7         | 1.010588824 | $\omega_1 = 1.00$ (100%)        |                           |
| Echites_turriger_TLA137_dhs_exon1-7         | 0.206812258 | $\omega_1 = 0.207$ (100%)       |                           |

|                                              |             |                            |                                  |
|----------------------------------------------|-------------|----------------------------|----------------------------------|
| Echites_woodsonianus_2                       | 17.95260929 | $\omega_1 = 0.111$ (99%)   | $\omega_2 = 10000000000$ (0.77%) |
| Prestonia_portobellensis_51_dhs_exon1-7      | 0.96603662  | $\omega_1 = 0.0855$ (100%) |                                  |
| Prestonia_coalita_3                          | 0.103847871 | $\omega_1 = 0.327$ (100%)  |                                  |
| Parsonsia_alboflavescens_PA90_dhs_exon1-7    | 48.55876297 | $\omega_1 = 0.00$ (100%)   |                                  |
| Macropharynx_spectabilis_TL210_dhs_exon1-7   | 21.46336819 | $\omega_1 = 0.00$ (99%)    | $\omega_2 = 27.9$ (1.2%)         |
| Macropharynx_peltata_49_dhs_exon1-7          | 3.334027358 | $\omega_1 = 0.00$ (100%)   |                                  |
| Rhodocalyx_rotundifolius_PA109b_dhs_exon1-7  | 0.497762688 | $\omega_1 = 0.102$ (100%)  |                                  |
| Rhodocalyx_riedelii_TL205_dhs_exon1-7        | 0.177470267 | $\omega_1 = 0.178$ (100%)  |                                  |
| Temnadenia_odorifera_TL213_dhs_exon1-7       | 0.284490594 | $\omega_1 = 0.184$ (100%)  |                                  |
| Laubertia_boissieri_TL220_dhs_exon1-7        | 0.557337312 | $\omega_1 = 0.0961$ (100%) |                                  |
| Pinochia_corymbosa_TL96_dhs_exon1-7          | 0.581854414 | $\omega_1 = 0.100$ (100%)  |                                  |
| Secondatia_densiflora_PA62B_dhs_exon1-7      | 0.803988071 | $\omega_1 = 0.0724$ (100%) |                                  |
| Odontadenia_perrottetii_PA60B_dhs_exon1-7    | 17.12241033 | $\omega_1 = 0.00$ (99%)    | $\omega_2 = 14.6$ (1.2%)         |
| Stipecoma_peltigera_TLA134_dhs_exon1-7       | 0.721453325 | $\omega_1 = 0.0999$ (100%) |                                  |
| Elytropus_chilensis_TLA257_dhs_exon1-7       | 1.002573964 | $\omega_1 = 1.00$ (100%)   |                                  |
| Elytropus_chilensis_TL208_dhs_exon1-7        | 3.338393954 | $\omega_1 = 0.00$ (100%)   |                                  |
| Mesechites_trifidus_45_dhs_exon1-7           | 0.073609302 | $\omega_1 = 0.433$ (100%)  |                                  |
| Allomarkgrafia_brenesiana_PA98_dhs_exon1-7   | 0.661528799 | $\omega_1 = 0.0761$ (100%) |                                  |
| Forsteronia_guyanensis_TLA39_dhs_exon1-6     | 0.380945486 | $\omega_1 = 0.157$ (100%)  |                                  |
| Mandevilla_boliviensis_TLA76_dhs_exon1-7     | 0.360826315 | $\omega_1 = 0.165$ (100%)  |                                  |
| Rhabdadenia_madida_TL206_dhs_exon1-7         | 0.223829049 | $\omega_1 = 0.173$ (100%)  |                                  |
| Kibatalia_macrophylla_TLA18_dhs1_exon1-7     | 0.323380619 | $\omega_1 = 0.0868$ (100%) |                                  |
| Funtumia_elastica_TLA144_dhs2_exon1-7        | 0           | $\omega_1 = 1.44$ (100%)   |                                  |
| Malouetiella_mildbraedii_TLA246_dhs_exon1-7  | 0.611702635 | $\omega_1 = 0.118$ (100%)  |                                  |
| Funtumia_elastica_TLA144_dhs1_exon1-7        | 0.254567379 | $\omega_1 = 0.194$ (100%)  |                                  |
| Kibatalia_macrophylla_TLA18_dhs2_exon1-7     | 0.057997267 | $\omega_1 = 0.489$ (100%)  |                                  |
| Holarrhena_pubescens_2                       | 3.38677139  | $\omega_1 = 0.00$ (100%)   |                                  |
| Holarrhena_curtisii_TLA17_dhs_exon1-7        | 17.13655578 | $\omega_1 = 0.0579$ (100%) |                                  |
| Mascarenhasia_arborescens_TLA143_dhs_exon1-7 | 0.662826016 | $\omega_1 = 0.110$ (100%)  |                                  |
| Pachypodium_baronii_47_dhs_exon1-7           | 0.445036417 | $\omega_1 = 0.135$ (100%)  |                                  |
| Neobracea_velenzuelana                       | 1.31805063  | $\omega_1 = 0.0484$ (100%) |                                  |
| Galactophora_schomburgkiana_PA87_dhs_exon1-7 | 0.542260754 | $\omega_1 = 0.120$ (100%)  |                                  |
| Nerium_oleander_TLA109_dhs_exon1-7           | 0.053610783 | $\omega_1 = 0.489$ (100%)  |                                  |

|                                               |             |                                 |                           |
|-----------------------------------------------|-------------|---------------------------------|---------------------------|
| Adenium_obesum                                | 1.157507948 | $\omega_1 = 0.0588$ (100%)      |                           |
| Strophanthus_boivinii_TLA133_dhs1_exon1-7     | 1.033965941 | $\omega_1 = 1.00$ (100%)        |                           |
| Strophanthus_boivinii_TLA133_dhs3_exon1-7     | 0.099808973 | $\omega_1 = 0.355$ (100%)       |                           |
| Strophanthus_boivinii_TLA133_dhs2_exon1-7     | 0.546476896 | $\omega_1 = 0.131$ (100%)       |                           |
| Strophanthus_preussii_TLA10_dhs_exon1-7       | 0.221951977 | $\omega_1 = 0.206$ (100%)       |                           |
| Alafia_thouarsii_TL216_dhs_exon1-7            | 0.137607422 | $\omega_1 = 0.279$ (100%)       |                           |
| Alafia_barteri_52_dhs_exon1-7                 | 0.294063414 | $\omega_1 = 0.137$ (100%)       |                           |
| Isonema_smeathmannii_TLA142_dhs_exon1-7       | 0.23372624  | $\omega_1 = 0.00549$ (98%)      | $\omega_2 = 14.6$ (2.0%)  |
| Wrightia_religiosa_TL104_dhs1_exon1-7         | 0.631421032 | $\omega_1 = 0.116$ (100%)       |                           |
| Wrightia_arborea_TLA91_dhs1_exon1-7           | 0.633521428 | $\omega_1 = 0.116$ (100%)       |                           |
| Wrightia_lanceolata_TL103_dhs1_exon1-7        | 0.028791317 | $\omega_1 = 0.697$ (100%)       |                           |
| Stephanostema_stenocarpum_TLA232_dhs1_exon1-7 | 0.609103699 | $\omega_1 = 0.116$ (100%)       |                           |
| Pleioceras_barteri_TLA244_dhs1_exon1-7        | 0           | $\omega_1 = 10000000000$ (100%) |                           |
| Rauvolfia_tetraphylla                         | 0.267360099 | $\omega_1 = 0.139$ (100%)       |                           |
| Rauvolfia_balansae_PA106_dhs_exon1-7          | 0.147177786 | $\omega_1 = 0.267$ (100%)       |                           |
| Rauvolfia_vomitoria_PA108_dhs_exon1-7         | 0.509525251 | $\omega_1 = 0.133$ (100%)       |                           |
| Rauvolfia_serpentina                          | 0.182212257 | $\omega_1 = 0.168$ (100%)       |                           |
| Rauvolfia_verticillata_PA91_dhs_exon1-7       | 0.544369269 | $\omega_1 = 0.0638$ (100%)      |                           |
| Kamettia_chandeei                             | 15.20596061 | $\omega_1 = 0.0759$ (99%)       | $\omega_2 = 39.2$ (0.79%) |
| Catharanthus_ovalis                           | 1.001808541 | $\omega_1 = 1.00$ (100%)        |                           |
| Catharanthus_roseus                           | 0.999808354 | $\omega_1 = 1.00$ (100%)        |                           |
| Catharanthus_longifolius                      | 0.396301399 | $\omega_1 = 0.00$ (100%)        |                           |
| Vinca_minor                                   | 0.1736246   | $\omega_1 = 0.244$ (100%)       |                           |
| Vinca_major_43_dhs_exon1-7                    | 0.361664845 | $\omega_1 = 0.0827$ (100%)      |                           |
| Ochrosia_poweri_PA89_dhs_exon1-7              | 0.092951483 | $\omega_1 = 0.365$ (100%)       |                           |
| Ochrosia_coccinea_PA88_dhs_exon1-7            | 0.425120144 | $\omega_1 = 0.151$ (100%)       |                           |
| Pycnobotrya_nitida_59_dhs_exon1-7             | 0.717960078 | $\omega_1 = 0.0909$ (100%)      |                           |
| Plectaneia_thouarsii                          | 1.918548171 | $\omega_1 = 0.0276$ (100%)      |                           |
| Diplorhynchus_condylocarpon_70_dhs_exon1-7    | 0.222131712 | $\omega_1 = 0.00$ (93%)         | $\omega_2 = 4.01$ (7.3%)  |
| Kopsia_rosea_69_dhs_exon1-7                   | 0.599644462 | $\omega_1 = 0.100$ (100%)       | $\omega_2 = 13.0$ (0.47%) |
| Tabernaemontana_bufalina_PA92_dhs_exon1-7     | 0.026226525 | $\omega_1 = 0.716$ (100%)       |                           |
| Tabernaemontana_bufalina_PA93_dhs_exon1-7     | 1.001809781 | $\omega_1 = 1.00$ (100%)        |                           |
| Tabernaemontana_elegans                       | 0.475464977 | $\omega_1 = 0.105$ (100%)       |                           |
| Tabernaemontana_pandacaqui_PA94_dhs_exon1-7   | 3.363621336 | $\omega_1 = 0.00$ (100%)        |                           |

|                                               |   |             |                            |                           |
|-----------------------------------------------|---|-------------|----------------------------|---------------------------|
| Tabernaemontana_peduncularis_PA95_dhs_exon1-7 |   | 0.094906951 | $\omega_1 = 0.363$ (100%)  |                           |
| Amsonia_hubrichtii_2                          |   | 0           | $\omega_1 = 1.46$ (100%)   |                           |
| Amsonia_hubrichtii_1                          |   | 1.009209103 | $\omega_1 = 1.00$ (100%)   |                           |
| Amsonia_orientalis_PA97_dhs_exon1-7           |   | 0           | $\omega_1 = 1.10$ (100%)   |                           |
| Hunteria_zeylanica_67c_dhs_exon1-7            |   | 1.732431151 | $\omega_1 = 0.0322$ (100%) |                           |
| Craspidospermum_verticillatum_58_dhs_exon1-7  |   | 0.448120107 | $\omega_1 = 0.121$ (100%)  |                           |
| Himatanthus_bracteatus                        |   | 1.149262922 | $\omega_1 = 1.00$ (100%)   |                           |
| Himatanthus_obovatus_PA99_dhs_exon1-7         |   | 1.149262922 | $\omega_1 = 1.00$ (100%)   |                           |
| Plumeria_cubensis_48_dhs_exon1-7              |   | 0.194918084 | $\omega_1 = 0.189$ (100%)  |                           |
| Allamanda_schottii_46_dhs_exon1-7             |   | 0.541530589 | $\omega_1 = 0.101$ (100%)  | $\omega_2 = 41.4$ (0.41%) |
| Thevetia_peruviana_56_dhs_exon1-7             |   | 0.632566776 | $\omega_1 = 0.101$ (100%)  |                           |
| Haplophyton_crooksii                          |   | 1.920159503 | $\omega_1 = 0.00$ (97%)    | $\omega_2 = 2.88$ (2.6%)  |
| Gelsemium_sempervirens_32_dhs_exon1-7         |   | 1.104423486 | $\omega_1 = 0.0104$ (95%)  | $\omega_2 = 1.60$ (4.7%)  |
| root                                          |   | 0           | $\omega_1 = 0$             |                           |
| 1                                             |   | 0           | $\omega_1 = 0$             |                           |
| 2                                             |   | 0.26811171  | $\omega_1 = 0.113$ (99%)   | $\omega_2 = 28.0$ (1.5%)  |
| 3                                             |   | 16.5354877  | $\omega_1 = 0.0968$ (100%) |                           |
| 4                                             |   | 2.219431619 | $\omega_1 = 0.00$ (100%)   |                           |
| 5                                             |   | 0           | $\omega_1 = 35.6$ (100%)   |                           |
| 6                                             |   | 0           | $\omega_1 = 2.04$ (100%)   |                           |
| 7                                             | A | 0.010603799 | $\omega_1 = 0.826$ (100%)  |                           |
| 8                                             |   | 0.462448582 | $\omega_1 = 0.131$ (100%)  |                           |
| 9                                             |   | 0.209344944 | $\omega_1 = 0.129$ (100%)  |                           |
| 10                                            |   | 0.877755792 | $\omega_1 = 0.117$ (100%)  |                           |
| 11                                            | B | 0.408378276 | $\omega_1 = 0.168$ (100%)  |                           |
| 12                                            |   | 1.935439934 | $\omega_1 = 0.00$ (100%)   |                           |
| 13                                            |   | 0.998282387 | $\omega_1 = 1.00$ (100%)   |                           |
| 14                                            |   | 0.075613853 | $\omega_1 = 0.158$ (100%)  |                           |
| 15                                            | C | 0.118646063 | $\omega_1 = 0.261$ (98%)   | $\omega_2 = 19.0$ (2.3%)  |
| 16                                            |   | 1.25476622  | $\omega_1 = 0.0573$ (100%) |                           |
| 17                                            |   | 1.490929545 | $\omega_1 = 0.0382$ (100%) |                           |

|    |   |             |                                 |                                  |
|----|---|-------------|---------------------------------|----------------------------------|
| 18 |   | 1.804826961 | $\omega_1 = 0.0367$ (100%)      |                                  |
| 19 |   | 2.977342561 | $\omega_1 = 0.00$ (100%)        |                                  |
| 20 |   | 0.818960701 | $\omega_1 = 0.0907$ (100%)      |                                  |
| 21 |   | 3.347321783 | $\omega_1 = 0.00$ (100%)        |                                  |
| 26 |   | 3.352762036 | $\omega_1 = 0.00$ (100%)        |                                  |
| 30 |   | 31.80967374 | $\omega_1 = 0.00$ (99%)         | $\omega_2 = 142$ (0.91%)         |
| 31 |   | 0.522125274 | $\omega_1 = 0.133$ (100%)       |                                  |
| 32 |   | 0.202203922 | $\omega_1 = 0.212$ (100%)       |                                  |
| 36 |   | 0.613866767 | $\omega_1 = 0.133$ (100%)       |                                  |
| 37 |   | 1.146507432 | $\omega_1 = 0.0596$ (100%)      |                                  |
| 41 |   | 3.347714096 | $\omega_1 = 0.00$ (100%)        |                                  |
| 42 |   | 0.194579702 | $\omega_1 = 0.250$ (100%)       |                                  |
| 43 |   | 0.304739311 | $\omega_1 = 0.208$ (100%)       |                                  |
| 44 |   | 0.633742162 | $\omega_1 = 0.120$ (100%)       |                                  |
| 47 |   | 0.130654664 | $\omega_1 = 0.296$ (100%)       |                                  |
| 52 |   | 0.002898517 | $\omega_1 = 0.988$ (100%)       |                                  |
| 53 |   | 0           | $\omega_1 = 10000000000$ (100%) |                                  |
| 57 |   | 3.336618148 | $\omega_1 = 0.00$ (100%)        |                                  |
| 58 |   | 1.848504502 | $\omega_1 = 0.0437$ (100%)      |                                  |
| 59 |   | 0.998282387 | $\omega_1 = 1.00$ (100%)        |                                  |
| 60 |   | 50          | $\omega_1 = 0.00$ (100%)        | $\omega_2 = 10000000000$ (0.41%) |
| 64 |   | 0.150891659 | $\omega_1 = 0.214$ (100%)       |                                  |
| 68 |   | 0.185678897 | $\omega_1 = 0.205$ (100%)       |                                  |
| 71 |   | 3.375033565 | $\omega_1 = 0.00$ (100%)        |                                  |
| 72 | E | 3.333348104 | $\omega_1 = 0.00$ (100%)        |                                  |
| 73 |   | 0           | $\omega_1 = 10000000000$ (100%) |                                  |
| 74 |   | 0.006072081 | $\omega_1 = 0.911$ (100%)       |                                  |
| 75 |   | 0           | $\omega_1 = 10000000000$ (100%) |                                  |
| 76 |   | 17.33293904 | $\omega_1 = 0.0744$ (100%)      |                                  |
| 77 |   | 3.34349407  | $\omega_1 = 0.00$ (100%)        |                                  |
| 78 |   | 0.355951351 | $\omega_1 = 0.166$ (100%)       |                                  |
| 79 |   | 3.348977709 | $\omega_1 = 0.00$ (100%)        |                                  |
| 80 |   | 0.999808354 | $\omega_1 = 1.00$ (100%)        |                                  |

|     |   |             |                                 |                           |
|-----|---|-------------|---------------------------------|---------------------------|
| 86  |   | 1.053980029 | $\omega_1 = 0.0676$ (100%)      |                           |
| 87  |   | 0.302421028 | $\omega_1 = 0.181$ (100%)       |                           |
| 91  |   | 0.082740202 | $\omega_1 = 0.273$ (99%)        | $\omega_2 = 670$ (0.66%)  |
| 94  |   | 1.092417568 | $\omega_1 = 0.0366$ (100%)      |                           |
| 98  | D | 0.182009164 | $\omega_1 = 0.154$ (100%)       |                           |
| 99  |   | 0           | $\omega_1 = 10000000000$ (100%) |                           |
| 100 |   | 0           | $\omega_1 = 10000000000$ (100%) |                           |
| 104 |   | 3.342340851 | $\omega_1 = 0.00$ (100%)        |                           |
| 108 |   | 1.735209336 | $\omega_1 = 0.0264$ (100%)      |                           |
| 111 |   | 0.371698164 | $\omega_1 = 0.143$ (100%)       |                           |
| 112 |   | 0.151125208 | $\omega_1 = 0.263$ (100%)       |                           |
| 113 |   | 3.350183252 | $\omega_1 = 0.126$ (100%)       |                           |
| 114 |   | 3.332234969 | $\omega_1 = 0.00$ (100%)        |                           |
| 120 | L | 3.591722092 | $\omega_1 = 0.00$ (100%)        |                           |
| 121 |   | 0.329575763 | $\omega_1 = 0.0590$ (99%)       | $\omega_2 = 145$ (0.79%)  |
| 122 |   | 0.6886241   | $\omega_1 = 0.0132$ (95%)       | $\omega_2 = 2.27$ (4.7%)  |
| 123 |   | 1.350367761 | $\omega_1 = 0.0433$ (100%)      |                           |
| 124 |   | 0.496661199 | $\omega_1 = 0.152$ (100%)       |                           |
| 125 |   | 0.311252584 | $\omega_1 = 0.158$ (100%)       |                           |
| 126 |   | 3.355414708 | $\omega_1 = 0.00$ (100%)        |                           |
| 127 |   | 50          | $\omega_1 = 0.00$ (100%)        | $\omega_2 = 2950$ (0.41%) |
| 128 |   | 3.345814456 | $\omega_1 = 0.00$ (100%)        |                           |
| 129 |   | 0.004229264 | $\omega_1 = 0.359$ (100%)       |                           |
| 130 |   | 0.598195905 | $\omega_1 = 0.117$ (100%)       |                           |
| 131 | J | 25.05826724 | $\omega_1 = 0.600$ (100%)       |                           |
| 132 |   | 0.021353792 | $\omega_1 = 0.726$ (100%)       |                           |
| 133 |   | 0.29795872  | $\omega_1 = 0.179$ (100%)       |                           |
| 134 |   | 0.998282387 | $\omega_1 = 10000000000$ (100%) |                           |
| 135 |   | 3.364339001 | $\omega_1 = 0.00$ (100%)        |                           |
| 136 |   | 0           | $\omega_1 = 1.00$ (100%)        |                           |
| 137 |   | 0.023002465 | $\omega_1 = 0.740$ (100%)       |                           |
| 138 |   | 3.344106572 | $\omega_1 = 0.00$ (100%)        |                           |



|     |   |             |                                 |                                  |
|-----|---|-------------|---------------------------------|----------------------------------|
| 139 |   | 27.83308997 | $\omega_1 = 0.00$ (100%)        | $\omega_2 = 10000000000$ (0.31%) |
| 145 |   | 3.434715775 | $\omega_1 = 0.00$ (100%)        |                                  |
| 146 |   | 0           | $\omega_1 = 10000000000$ (100%) |                                  |
| 147 |   | 31.43247178 | $\omega_1 = 0.00$ (99%)         | $\omega_2 = 250$ (0.74%)         |
| 152 |   | 0.505232912 | $\omega_1 = 0.134$ (100%)       |                                  |
| 155 |   | 49.59788209 | $\omega_1 = 10000000000$ (100%) |                                  |
| 158 |   | 0.23695942  | $\omega_1 = 0.00$ (100%)        |                                  |
| 159 |   | 1.006893287 | $\omega_1 = 1.00$ (100%)        |                                  |
| 160 |   | 0.092342727 | $\omega_1 = 0.372$ (100%)       |                                  |
| 161 |   | 0           | $\omega_1 = 0.968$ (100%)       |                                  |
| 165 |   | 0.853461199 | $\omega_1 = 0.0882$ (100%)      |                                  |
| 168 |   | 3.367491689 | $\omega_1 = 0.00$ (100%)        |                                  |
| 171 |   | 0.112405282 | $\omega_1 = 0.692$ (100%)       |                                  |
| 172 |   | 0.019905828 | $\omega_1 = 0.402$ (100%)       |                                  |
| 179 |   | 1.422202587 | $\omega_1 = 0.0447$ (100%)      |                                  |
| 182 |   | 3.337130391 | $\omega_1 = 0.00$ (100%)        |                                  |
| 183 |   | 3.341336097 | $\omega_1 = 0.00$ (100%)        |                                  |
| 184 |   | 3.346633246 | $\omega_1 = 0.00$ (100%)        |                                  |
| 187 |   | 1.448171468 | $\omega_1 = 0.0463$ (100%)      |                                  |
| 190 |   | 1.030061972 | $\omega_1 = 0.0691$ (100%)      |                                  |
| 193 |   | 1.002573964 | $\omega_1 = 1.00$ (100%)        |                                  |
| 194 |   | 0.269322968 | $\omega_1 = 0.144$ (100%)       |                                  |
| 199 | I | 0.375219868 | $\omega_1 = 0.00$ (95%)         | $\omega_2 = 3.29$ (5.0%)         |
| 200 |   | 0.460131157 | $\omega_1 = 0.133$ (100%)       |                                  |
| 201 |   | 0.011993156 | $\omega_1 = 0.990$ (100%)       | $\omega_2 = 2790$ (0.35%)        |
| 202 |   | 0.160774773 | $\omega_1 = 0.246$ (100%)       |                                  |
| 210 |   | 0.304709644 | $\omega_1 = 0.143$ (100%)       |                                  |
| 211 |   | 0.088458648 | $\omega_1 = 0.375$ (100%)       |                                  |
| 215 | G | 0.050935898 | $\omega_1 = 0.580$ (100%)       |                                  |
| 216 | F | 32.50620624 | $\omega_1 = 0.00$ (99%)         | $\omega_2 = 198$ (1.2%)          |
| 217 |   | 0.005274499 | $\omega_1 = 0.581$ (100%)       |                                  |
| 218 |   | 0.915544575 | $\omega_1 = 0.0928$ (100%)      |                                  |
| 219 |   | 0.453706443 | $\omega_1 = 0.145$ (100%)       |                                  |

|     |   |             |                                 |                           |
|-----|---|-------------|---------------------------------|---------------------------|
| 220 |   | 3.355614723 | $\omega_1 = 0.00$ (100%)        |                           |
| 227 |   | 0.065033782 | $\omega_1 = 0.423$ (100%)       |                           |
| 228 |   | 0.17988491  | $\omega_1 = 0.138$ (98%)        | $\omega_2 = 12.2$ (1.9%)  |
| 229 | K | 0.100296179 | $\omega_1 = 0.363$ (99%)        | $\omega_2 = 62.5$ (0.52%) |
| 234 |   | 0.247987194 | $\omega_1 = 0.129$ (100%)       |                           |
| 235 |   | 34.42620881 | $\omega_1 = 0.00$ (100%)        | $\omega_2 = 631$ (0.32%)  |
| 236 |   | 0.999808354 | $\omega_1 = 1.00$ (100%)        |                           |
| 237 |   | 3.363496323 | $\omega_1 = 0.00$ (100%)        |                           |
| 240 |   | 0.999808354 | $\omega_1 = 1.00$ (100%)        |                           |
| 245 | H | 0.119850293 | $\omega_1 = 0.151$ (100%)       |                           |
| 246 |   | 3.358719011 | $\omega_1 = 0.00$ (100%)        |                           |
| 247 |   | 3.389900248 | $\omega_1 = 0.00$ (100%)        |                           |
| 248 |   | 3.338260294 | $\omega_1 = 0.00$ (100%)        |                           |
| 249 |   | 0.214567634 | $\omega_1 = 0.209$ (100%)       |                           |
| 250 |   | 0.386617792 | $\omega_1 = 0.172$ (100%)       |                           |
| 251 |   | 0.578354431 | $\omega_1 = 0.123$ (100%)       |                           |
| 252 |   | 3.36560223  | $\omega_1 = 0.00$ (100%)        |                           |
| 253 |   | 48.85788251 | $\omega_1 = 0.0171$ (100%)      |                           |
| 254 |   | 0.062737309 | $\omega_1 = 0.329$ (100%)       |                           |
| 255 |   | 1.737518635 | $\omega_1 = 0.0327$ (100%)      |                           |
| 256 |   | 30.10681522 | $\omega_1 = 0.0789$ (100%)      | $\omega_2 = 766$ (0.36%)  |
| 257 |   | 0.563948894 | $\omega_1 = 0.118$ (100%)       |                           |
| 258 |   | 0.212245236 | $\omega_1 = 0.178$ (100%)       |                           |
| 259 |   | 3.332369102 | $\omega_1 = 0.00$ (100%)        |                           |
| 260 |   | 0.316798907 | $\omega_1 = 0.178$ (100%)       |                           |
| 261 |   | 0.998282387 | $\omega_1 = 1.00$ (100%)        |                           |
| 262 |   | 1.001337824 | $\omega_1 = 1.00$ (100%)        |                           |
| 267 |   | 0.998282387 | $\omega_1 = 1.00$ (100%)        |                           |
| 268 |   | 0.998282387 | $\omega_1 = 1.00$ (100%)        |                           |
| 269 |   | 3.357775954 | $\omega_1 = 0.00$ (100%)        |                           |
| 274 |   | 3.327451879 | $\omega_1 = 0.00$ (100%)        |                           |
| 275 |   | 0           | $\omega_1 = 10000000000$ (100%) |                           |
| 279 |   | 3.334766272 | $\omega_1 = 0.00$ (100%)        |                           |

|     |             |                                 |                           |
|-----|-------------|---------------------------------|---------------------------|
| 280 | 0.998282387 | $\omega_1 = 1.00$ (100%)        |                           |
| 281 | 0.053237403 | $\omega_1 = 0.528$ (100%)       |                           |
| 282 | 0.08693414  | $\omega_1 = 0.393$ (100%)       |                           |
| 288 | 0           | $\omega_1 = 10000000000$ (100%) |                           |
| 289 | 0.998282387 | $\omega_1 = 1.00$ (100%)        |                           |
| 290 | 0.313225949 | $\omega_1 = 0.179$ (100%)       |                           |
| 293 | 0.177221579 | $\omega_1 = 0.119$ (100%)       |                           |
| 296 | 0.177316749 | $\omega_1 = 0.238$ (100%)       |                           |
| 297 | 0.08818641  | $\omega_1 = 0.381$ (100%)       |                           |
| 301 | 16.54707353 | $\omega_1 = 0.00$ (99%)         | $\omega_2 = 15.4$ (0.98%) |
| 302 | 0.357817288 | $\omega_1 = 0.203$ (100%)       |                           |
| 303 | 3.364926605 | $\omega_1 = 0.00$ (100%)        |                           |
| 304 | 0.165766871 | $\omega_1 = 0.191$ (100%)       |                           |
| 309 | 1.084631184 | $\omega_1 = 0.0597$ (100%)      |                           |
| 310 | 0.499036663 | $\omega_1 = 0.102$ (100%)       |                           |
| 316 | 0.199608303 | $\omega_1 = 0.225$ (100%)       |                           |
| 317 | 0.182419588 | $\omega_1 = 0.216$ (100%)       |                           |
| 321 | 0.743450056 | $\omega_1 = 0.0799$ (100%)      |                           |
| 322 | 0.279352528 | $\omega_1 = 0.175$ (100%)       |                           |
| 323 | 3.363784177 | $\omega_1 = 0.00$ (100%)        |                           |
| 324 | 3.360110653 | $\omega_1 = 0.00$ (100%)        |                           |
| 325 | 3.336294207 | $\omega_1 = 0.00$ (100%)        |                           |
| 328 | 0.327704248 | $\omega_1 = 0.175$ (100%)       |                           |
| 334 | 3.364496761 | $\omega_1 = 0.00$ (100%)        |                           |
| 335 | 0.021703289 | $\omega_1 = 0.963$ (100%)       |                           |
| 336 | 3.337507752 | $\omega_1 = 0.00$ (100%)        |                           |
| 337 | 3.355117264 | $\omega_1 = 0.00$ (100%)        |                           |
| 338 | 0.943792168 | $\omega_1 = 0.0842$ (100%)      |                           |
| 339 | 3.338768563 | $\omega_1 = 0.00$ (100%)        |                           |
| 340 | 3.278259375 | $\omega_1 = 0.00$ (100%)        |                           |
| 341 | 0           | $\omega_1 = 1.01$ (100%)        |                           |
| 342 | 0.060978392 | $\omega_1 = 0.320$ (100%)       |                           |

|     |             |                                 |                          |
|-----|-------------|---------------------------------|--------------------------|
| 343 | 3.357609259 | $\omega_1 = 0.00$ (100%)        |                          |
| 344 | 3.304643283 | $\omega_1 = 0.00$ (100%)        |                          |
| 352 | 3.353977958 | $\omega_1 = 0.00$ (100%)        |                          |
| 353 | 20.46226556 | $\omega_1 = 0.197$ (100%)       |                          |
| 356 | 1.420085335 | $\omega_1 = 0.0521$ (100%)      |                          |
| 359 | 0.485790787 | $\omega_1 = 0.117$ (100%)       |                          |
| 360 | 0           | $\omega_1 = 10000000000$ (100%) |                          |
| 361 | 3.387480897 | $\omega_1 = 0.00$ (100%)        |                          |
| 362 | 0.027333776 | $\omega_1 = 0.707$ (100%)       |                          |
| 367 | 3.358367285 | $\omega_1 = 0.00$ (100%)        |                          |
| 371 | 0.384795301 | $\omega_1 = 0.153$ (100%)       |                          |
| 372 | 1.467791418 | $\omega_1 = 0.0430$ (100%)      |                          |
| 376 | 3.339434541 | $\omega_1 = 0.00$ (100%)        |                          |
| 377 | 21.20621256 | $\omega_1 = 0.0613$ (99%)       | $\omega_2 = 358$ (0.69%) |
| 378 | 0.171410029 | $\omega_1 = 0.237$ (100%)       |                          |
| 382 | 0.629857681 | $\omega_1 = 0.112$ (100%)       |                          |
| 385 | 1.536624753 | $\omega_1 = 0.0401$ (100%)      |                          |
| 386 | 0.175057455 | $\omega_1 = 0.00$ (100%)        |                          |
| 387 | 1.14849123  | $\omega_1 = 0.0488$ (100%)      |                          |
| 388 | 0.063036918 | $\omega_1 = 0.388$ (100%)       |                          |
| 389 | 22.93256959 | $\omega_1 = 0.103$ (100%)       |                          |
| 390 | 3.36056655  | $\omega_1 = 0.00$ (100%)        |                          |
| 391 | 0.423585293 | $\omega_1 = 0.152$ (100%)       |                          |
| 392 | 3.338609961 | $\omega_1 = 0.00$ (100%)        |                          |
| 393 | 0           | $\omega_1 = 10000000000$ (100%) |                          |
| 397 | 3.338330894 | $\omega_1 = 0.00$ (100%)        |                          |
| 398 | 1.010588824 | $\omega_1 = 10000000000$ (100%) |                          |
| 404 | 0.087972754 | $\omega_1 = 0.383$ (100%)       |                          |
| 405 | 3.361553388 | $\omega_1 = 0.00$ (100%)        |                          |
| 409 | 0.232603186 | $\omega_1 = 0.208$ (100%)       |                          |
| 410 | 3.421100069 | $\omega_1 = 0.00$ (100%)        |                          |
| 411 | 3.335779983 | $\omega_1 = 0.00$ (100%)        |                          |

|     |             |                                 |                          |
|-----|-------------|---------------------------------|--------------------------|
| 412 | 3.33834429  | $\omega_1 = 0.00$ (100%)        |                          |
| 413 | 0.162532468 | $\omega_1 = 0.252$ (100%)       |                          |
| 421 | 3.339350745 | $\omega_1 = 0.00$ (100%)        |                          |
| 422 | 0           | $\omega_1 = 10000000000$ (100%) |                          |
| 423 | 0.457942234 | $\omega_1 = 0.00$ (100%)        |                          |
| 424 | 3.350380727 | $\omega_1 = 0.00$ (100%)        |                          |
| 428 | 0.071926757 | $\omega_1 = 0.432$ (100%)       |                          |
| 431 | 0.173227189 | $\omega_1 = 0.234$ (100%)       |                          |
| 432 | 0.013495715 | $\omega_1 = 0.964$ (100%)       |                          |
| 433 | 1.298302389 | $\omega_1 = 0.0506$ (100%)      |                          |
| 439 | 0.513549003 | $\omega_1 = 0.0911$ (100%)      |                          |
| 440 | 3.354299689 | $\omega_1 = 0.00$ (100%)        |                          |
| 441 | 3.384900912 | $\omega_1 = 0.00$ (100%)        |                          |
| 442 | 0.999044934 | $\omega_1 = 1.00$ (100%)        |                          |
| 443 | 3.333439538 | $\omega_1 = 0.00$ (100%)        |                          |
| 444 | 0.998282387 | $\omega_1 = 1.00$ (100%)        |                          |
| 445 | 0.353580792 | $\omega_1 = 0.167$ (100%)       |                          |
| 451 | 0.653045581 | $\omega_1 = 0.113$ (100%)       |                          |
| 455 | 3.411741435 | $\omega_1 = 0.00$ (100%)        |                          |
| 456 | 0.0107735   | $\omega_1 = 0.935$ (100%)       |                          |
| 460 | 3.09296643  | $\omega_1 = 0.00$ (100%)        |                          |
| 463 | 3.345088353 | $\omega_1 = 0.00$ (100%)        |                          |
| 464 | 3.357386942 | $\omega_1 = 0.00$ (100%)        |                          |
| 465 | 0.133652963 | $\omega_1 = 0.232$ (100%)       |                          |
| 466 | 0.155627966 | $\omega_1 = 0.250$ (100%)       |                          |
| 471 | 0.827489595 | $\omega_1 = 0.0979$ (100%)      |                          |
| 472 | 0.571208102 | $\omega_1 = 0.124$ (100%)       |                          |
| 476 | 0.272184204 | $\omega_1 = 0.00$ (91%)         | $\omega_2 = 2.42$ (8.9%) |
| 477 | 50          | $\omega_1 = 0.00$ (99%)         | $\omega_2 = 725$ (1.3%)  |
| 478 | 1.007194478 | $\omega_1 = 1.00$ (100%)        |                          |
| 482 | 0.2663649   | $\omega_1 = 0.192$ (100%)       |                          |
| 485 | 0           | $\omega_1 = 10000000000$ (100%) |                          |

|     |             |                                 |                         |
|-----|-------------|---------------------------------|-------------------------|
| 486 | 0.16813912  | $\omega_1 = 0.210$ (100%)       |                         |
| 487 | 3.350486791 | $\omega_1 = 0.00$ (100%)        |                         |
| 488 | 3.362584161 | $\omega_1 = 0.00$ (100%)        |                         |
| 489 | 0.094850645 | $\omega_1 = 0.351$ (100%)       |                         |
| 490 | 0.179828724 | $\omega_1 = 0.220$ (100%)       |                         |
| 491 | 3.3551024   | $\omega_1 = 0.00$ (100%)        |                         |
| 492 | 50          | $\omega_1 = 0.00$ (100%)        |                         |
| 493 | 0           | $\omega_1 = 0.00$ (98%)         | $\omega_2 = 624$ (2.0%) |
| 494 | 15.69072744 | $\omega_1 = 0.0605$ (100%)      |                         |
| 495 | 0           | $\omega_1 = 1.00$ (100%)        |                         |
| 496 | 3.342014482 | $\omega_1 = 0.00$ (100%)        |                         |
| 497 | 0.632679551 | $\omega_1 = 0.115$ (100%)       |                         |
| 504 | 1.094657992 | $\omega_1 = 0.0623$ (100%)      |                         |
| 505 | 3.371466293 | $\omega_1 = 0.00$ (100%)        |                         |
| 509 | 0.493657022 | $\omega_1 = 0.106$ (100%)       |                         |
| 512 | 0.794190147 | $\omega_1 = 0.0998$ (100%)      |                         |
| 516 | 3.362684042 | $\omega_1 = 0.00$ (100%)        |                         |
| 520 | 0.497318825 | $\omega_1 = 0.124$ (100%)       |                         |
| 521 | 0.080118996 | $\omega_1 = 0.386$ (100%)       |                         |
| 522 | 0.357559884 | $\omega_1 = 0.169$ (100%)       |                         |
| 526 | 0.105577002 | $\omega_1 = 0.519$ (100%)       |                         |
| 529 | 0           | $\omega_1 = 10000000000$ (100%) |                         |
| 530 | 3.331692292 | $\omega_1 = 0.00$ (100%)        |                         |
| 531 | 0.515860738 | $\omega_1 = 0.141$ (100%)       |                         |
| 532 | 0.088418365 | $\omega_1 = 0.379$ (100%)       |                         |
| 538 | 0.650051685 | $\omega_1 = 0.00$ (100%)        |                         |
| 539 | 0.263439045 | $\omega_1 = 0.146$ (100%)       |                         |
| 540 | 1.866731288 | $\omega_1 = 0.0305$ (100%)      |                         |
| 541 | 0.105986066 | $\omega_1 = 0.339$ (100%)       |                         |

**Table S11:** Model selection using AICc with RELAX, comparing the null and alternative models for designated reference and test branches (see Table 2 for details of the comparisons). The fit of the general descriptive model is also reported. The optimal  $\omega_1$ ,  $\omega_2$ ,  $\omega_3$  rates and percentage of sites assigned to each rate class are reported for each model. See Figs. 3, 4, and S3 for reduced and full dataset topologies.

**Table S11.1: V269I**

| Tree Topology   | Model               | logL     | # parameters | AICc    | Branch set   | $\omega_1$    | $\omega_2$    | $\omega_3$    |
|-----------------|---------------------|----------|--------------|---------|--------------|---------------|---------------|---------------|
| Reduced dataset | General descriptive | -33649.9 | 1113         | 69550.8 | shared       | 0.0 (72.61%)  | 0.14 (26.03%) | 1.21 (1.37%)  |
|                 | RELAX alternative   | -34093.5 | 572          | 69337.6 | reference    | 0.0 (80.81%)  | 0.89 (18.43%) | 22.07 (0.75%) |
|                 |                     |          |              |         | test         | 0.0 (80.81%)  | 0.87 (18.43%) | 37.52 (0.75%) |
|                 | RELAX null          | -34092.3 | 571          | 69335.7 | reference    | 0.0 (80.47%)  | 0.84 (18.67%) | 22.03 (0.86%) |
| test            |                     |          |              |         | 0.0 (80.47%) | 0.84 (18.67%) | 22.03 (0.86%) |               |

**Table S11.2: D273N**

| Tree                         | Model               | logL     | # parameters | AICc    | Branch set    | $\omega_1$    | $\omega_2$    | $\omega_3$    |
|------------------------------|---------------------|----------|--------------|---------|---------------|---------------|---------------|---------------|
| Full dataset topology<br>(1) | General descriptive | -33786.0 | 1113         | 69823   | shared        | 0.0 (4.77%)   | 0.0 (86.88%)  | 1.08 (8.34%)  |
|                              | RELAX alternative   | -34110.5 | 572          | 69371.6 | reference     | 0.09 (77.97%) | 0.23 (20.75%) | 11.50 (1.29%) |
|                              |                     |          |              |         | test          | 0.12 (77.97%) | 0.28 (20.75%) | 8.31 (1.29%)  |
|                              | RELAX null          | -34112.0 | 571          | 69372.4 | reference     | 0.09 (77.27%) | 0.26 (21.20%) | 8.72 (1.53%)  |
| test                         |                     |          |              |         | 0.09 (77.27%) | 0.26 (21.20%) | 8.72 (1.53%)  |               |
| Full dataset topology<br>(2) | General descriptive | -33664.7 | 1113         | 69580.3 | shared        | 0.0 (72.29%)  | 0.14 (26.31%) | 1.21 (1.39%)  |
|                              | RELAX alternative   | -34106.7 | 572          | 69363.9 | reference     | 0.0 (32.98%)  | 0.0 (58.52%)  | 2.64 (8.50%)  |
|                              |                     |          |              |         | test          | 0.0 (32.98%)  | 0.0 (58.52%)  | 3.21 (8.50%)  |
|                              | RELAX null          | -34111.9 | 571          | 69372.3 | reference     | 0.06 (65.58%) | 0.26 (32.97%) | 8.98 (1.45%)  |
| test                         |                     |          |              |         | 0.06 (65.58%) | 0.26 (32.97%) | 8.98 (1.45%)  |               |
| Reduced dataset (1)          | General descriptive | -33651.3 | 1113         | 69553.5 | shared        | 0.0 (72.83%)  | 0.12 (25.82%) | 1.24 (1.35%)  |
|                              | RELAX alternative   | -34091.3 | 572          | 69333.2 | reference     | 0.08 (66.94%) | 0.2 (31.9%)   | 12.68 (1.15%) |
|                              |                     |          |              |         | test          | 0.12 (66.94%) | 0.25 (31.9%)  | 8.79 (1.15%)  |
|                              | RELAX null          | -34093.1 | 571          | 69347.5 | reference     | 0.1 (69.7%)   | 0.22 (28.95%) | 9.52 (1.36%)  |
| test                         |                     |          |              |         | 0.1 (69.7%)   | 0.22 (28.95%) | 9.52 (1.36%)  |               |
| Reduced dataset (2)          | General descriptive | -33651.3 | 1113         | 69563.2 | shared        | 0.0 (73.19%)  | 0.15 (25.56%) | 1.24 (1.25%)  |
|                              | RELAX alternative   | -34091.5 | 572          | 69333.6 | reference     | 0.08 (68.82%) | 0.2 (30.05%)  | 12.9 (1.13%)  |
|                              |                     |          |              |         | test          | 0.12 (68.82%) | 0.26 (30.05%) | 8.92 (1.13%)  |
|                              | RELAX null          | -34093.5 | 571          | 69341.2 | reference     | 0.1 (70.23%)  | 0.21 (28.42%) | 9.56 (1.35%)  |
| test                         |                     |          |              |         | 0.1 (70.23%)  | 0.21 (28.42%) | 9.56 (1.35%)  |               |

**Table S11.3: HSS-like IXXXN and IXXXD vs. VXXXD**

| Tree                  | Model               | logL                | # parameters | AICc    | Branch set | $\omega_1$    | $\omega_2$    | $\omega_3$     |
|-----------------------|---------------------|---------------------|--------------|---------|------------|---------------|---------------|----------------|
| Full dataset topology | General descriptive | -33665.0            | 1113         | 69580.9 | shared     | 0.0 (71.99%)  | 0.13 (26.62%) | 1.22 (1.39%)   |
|                       | RELAX alternative   | -34110.3            | 572          | 69371.1 | reference  | 0.03 (81.21%) | 0.71 (18.61%) | 47.79 (0.18%)  |
|                       |                     |                     |              |         | test       | 0.06 (81.21%) | 0.76 (18.61%) | 20.87 (0.18%)  |
|                       | RELAX null          | -34111.1            | 571          | 69370.8 | reference  | 0.0 (79.86%)  | 0.81 (19.97%) | 40.63 (0.17%)  |
|                       |                     |                     |              |         | test       | 0.0 (79.86%)  | 0.81 (19.97%) | 40.63 (0.17%)  |
|                       | Reduced dataset     | General descriptive | -31999.6     | 1113    | 66251.1    | shared        | 0.0 (74.93%)  | 0.09 (23.84%)  |
| RELAX alternative     |                     | -32425.4            | 572          | 66001.5 | reference  | 0.0 (83.99%)  | 1.0 (15.92%)  | 57.19 (0.09%)  |
|                       |                     |                     |              |         | test       | 0.0 (83.99%)  | 1.0 (15.92%)  | 428.54 (0.09%) |
| RELAX null            |                     | -32428.0            | 571          | 66004.8 | reference  | 0.01 (84.31%) | 0.96 (15.62%) | 107.35 (0.08%) |
|                       |                     |                     |              |         | test       | 0.01 (84.31%) | 0.96 (15.62%) | 107.35 (0.08%) |

**Table S11.4: HSS-like vs. DHS-like**

| Tree                  | Model               | logL                | # parameters | AICc    | Branch set | $\omega_1$    | $\omega_2$    | $\omega_3$    |
|-----------------------|---------------------|---------------------|--------------|---------|------------|---------------|---------------|---------------|
| Full dataset topology | General descriptive | -33663.6            | 1113         | 69578.3 | shared     | 0.0 (72.13%)  | 0.16 (26.48%) | 1.18 (1.4%)   |
|                       | RELAX alternative   | -34112.8            | 572          | 69376.2 | reference  | 0.0 (83.48%)  | 1.0 (16.44%)  | 32.34 (0.08%) |
|                       |                     |                     |              |         | test       | 0.0 (83.48%)  | 1.0 (16.44%)  | 94.77 (0.08%) |
|                       | RELAX null          | -34108.5            | 571          | 69378.3 | reference  | 0.01 (83.48%) | 0.91 (16.46%) | 43.81 (0.11%) |
|                       |                     |                     |              |         | test       | 0.01 (83.48%) | 0.91 (16.46%) | 43.81 (0.11%) |
|                       | Reduced dataset     | General descriptive | -33658.6     | 1113    | 69568.2    | shared        | 0.0 (72.83%)  | 0.23 (26.11%) |
| RELAX alternative     |                     | -34098.1            | 572          | 69346.7 | reference  | 0.0 (83.53%)  | 1.0 (16.39%)  | 32.05 (0.08%) |
|                       |                     |                     |              |         | test       | 0.0 (83.53%)  | 1.0 (16.39%)  | 92.32 (0.08%) |
| RELAX null            |                     | -34099.5            | 571          | 69347.5 | reference  | 0.01 (82.93%) | 0.92 (16.99%) | 67.36 (0.08%) |
|                       |                     |                     |              |         | test       | 0.01 (82.93%) | 0.92 (16.99%) | 67.36 (0.08%) |



**Table S12:** Model selection with AICc with MEME, and inferred  $\omega$  for *a priori* test branches (lettered branches A-G, as well as the *hss*-like *Amphineurion marginatum*, *Isonema smeathmannii*, *Marsdenia tinctoria*, and *Strophanthus boivinii* branches (Figs. 3, 4, S3) and the background branches (i.e. remainder of tree) under the optimal model.

| Tree                  | Model           | AICc     | LogL      | parameters | $\omega$ background branches | $\omega$ test branches |
|-----------------------|-----------------|----------|-----------|------------|------------------------------|------------------------|
| Full dataset topology | Nucleotide GTR  | 71309.49 | -35098.68 | 555        | --                           | --                     |
|                       | Global MG94xREV | 66307.48 | -32587.45 | 563        | 0.142                        | 0.262                  |
| Reduced dataset       | Nucleotide GTR  | 71291.44 | -35089.66 | 555        | --                           | --                     |
|                       | Global MG94xREV | 66282.23 | -32574.83 | 563        | 0.143                        | 0.279                  |
